1 **Distribution of ACE2, CD147, cyclophilins, CD26 and other SARS-CoV-2 associated molecules in**  
2 **human tissues and immune cells in health and disease**

3 **Short title:** SARS-CoV-2 associated molecules in health and disease

4 Radzikowska U.<sup>1,2,3\*</sup>, Ding M.<sup>1,2,4\*</sup>, Tan G.<sup>1,5</sup>, Zhakparov D.<sup>1</sup>, Peng Y.<sup>1,2,6</sup>, Wawrzyniak P.<sup>1,2,7</sup>, Wang  
5 M.<sup>1,2,8</sup>, Li S.<sup>1,9</sup>, Morita H.<sup>1,10</sup>, Altunbulakli C.<sup>1,2</sup>, Reiger M.<sup>11</sup>, Neumann AU.<sup>11,12,13</sup>, Lunjani N.<sup>1,2</sup>, Traidl-  
6 Hoffmann C.<sup>2,11</sup>, Nadeau K.<sup>14</sup>, O'Mahony L.<sup>1,15</sup>, Akdis CA.<sup>1,2</sup>, Sokolowska M.<sup>1,2#</sup>

7  
8 **\*equal contribution**

9 **Affiliations**

10 <sup>1</sup> Swiss Institute of Allergy and Asthma Research (SIAF), University of Zurich, Davos, Switzerland

11 <sup>2</sup> Christine Kühne – Center for Research and Education (CK-CARE), Davos, Switzerland

12 <sup>3</sup> Department of Regenerative Medicine and Immune Regulation, Medical University of Bialystok,  
13 Bialystok, Poland

14 <sup>4</sup> Department of Allergology, Zhongnan Hospital of Wuhan University, Wuhan, China

15 <sup>5</sup> Functional Genomic Centre Zurich, ETH Zurich/University of Zurich, Zurich, Switzerland

16 <sup>6</sup> Otorhinolaryngology Hospital, The First Affiliated Hospital, Sun Yat-sen University, Guangzhou,  
17 China

18 <sup>7</sup> Division of Clinical Chemistry and Biochemistry, University Children`s Hospital Zurich, Zurich,  
19 Switzerland; Children`s Research Center, University Children`s Hospital Zurich, Zurich, Switzerland

20 <sup>8</sup> Department of Otolaryngology, Head and Neck Surgery, Beijing TongRen Hospital, Capital Medical  
21 University and the Beijing Key Laboratory of Nasal Diseases, Beijing Institute of Otolaryngology,  
22 Beijing, China

23 <sup>9</sup> Department of Cancer Immunology, Institute for Cancer Research, Oslo University Hospital, Oslo,  
24 Norway

25 <sup>10</sup> Department of Allergy and Clinical Immunology, National Research Institute for Child Health and  
26 Development, Tokyo, Japan

27 <sup>11</sup> Chair and Institute of Environmental Medicine, UNIKA-T, Technical University of Munich and  
28 Helmholtz Zentrum Munchen, Augsburg, Germany

29 <sup>12</sup> Institute of Computational Biology (ICB), Helmholtz Zentrum Munchen, Munich, Germany

30 <sup>13</sup> Institute of Experimental Medicine (IEM), Czech Academy of Sciences, Prague, Czech Republic

31 <sup>14</sup> Sean N Parker Centre for Allergy and Asthma Research at Stanford University, Department of  
32 Medicine, Stanford University School of Medicine, Stanford, USA

33 <sup>15</sup> Department of Medicine and School of Microbiology, APC Microbiome Ireland, National University  
34 of Ireland, Cork, Ireland

35 **# corresponding author:**

36

37 Milena Sokolowska MD, PhD

38 Head Immune Metabolism

39 Swiss Institute of Allergy and Asthma Research (SIAF)

40 University of Zurich

41 Herman-Burchard-Strasse 9

42 CH-7265 Davos-Wolfgang

43 Tel: +41 (0) 81 410 08 44

44 Email: [milena.sokolowska@siaf.uzh.ch](mailto:milena.sokolowska@siaf.uzh.ch)

45 [https://www.siaf.uzh.ch/immune\\_metabolism.html](https://www.siaf.uzh.ch/immune_metabolism.html)

46

47

48 **Abstract**

49 **Background.** Morbidity and mortality from COVID-19 caused by novel coronavirus SARS-CoV-2 is  
50 accelerating worldwide and novel clinical presentations of COVID-19 are often reported. The range  
51 of human cells and tissues targeted by SARS-CoV-2, its potential receptors and associated regulating  
52 factors are still largely unknown. The aim of our study was to analyze the expression of known and  
53 potential SARS-CoV-2 receptors and related molecules in the extensive collection of primary human  
54 cells and tissues from healthy subjects of different age and from patients with risk factors and known  
55 comorbidities of COVID-19.

56  
57 **Methods.** We performed RNA sequencing and explored available RNA-Seq databases to study gene  
58 expression and co-expression of ACE2, CD147 (*BSG*), CD26 (*DPP4*) and their direct and indirect  
59 molecular partners in primary human bronchial epithelial cells, bronchial and skin biopsies,  
60 bronchoalveolar lavage fluid, whole blood, peripheral blood mononuclear cells (PBMCs), monocytes,  
61 neutrophils, DCs, NK cells, ILC1, ILC2, ILC3, CD4<sup>+</sup> and CD8<sup>+</sup> T cells, B cells and plasmablasts. We  
62 analyzed the material from healthy children and adults, and from adults in relation to their disease  
63 or COVID-19 risk factor status.

64  
65 **Results.** *ACE2* and *TMPRSS2* were coexpressed at the epithelial sites of the lung and skin, whereas  
66 CD147 (*BSG*), cyclophilins (*PPIA* and *PPIB*), CD26 (*DPP4*) and related molecules were expressed in  
67 both, epithelium and in immune cells. We also observed a distinct age-related expression profile of  
68 these genes in the PBMCs and T cells from healthy children and adults. Asthma, COPD, hypertension,  
69 smoking, obesity, and male gender status generally led to the higher expression of ACE2- and CD147-  
70 related genes in the bronchial biopsy, BAL or blood. Additionally, CD147-related genes correlated  
71 positively with age and BMI. Interestingly, we also observed higher expression of ACE2- and CD147-  
72 related genes in the lesional skin of patients with atopic dermatitis.

73  
74 **Conclusions.** Our data suggest different receptor repertoire potentially involved in the SARS-CoV-2  
75 infection at the epithelial barriers and in the immune cells. Altered expression of these receptors  
76 related with age, gender, obesity and smoking, as well as with the disease status might contribute to  
77 COVID-19 morbidity and severity patterns.

78  
79 **Keywords:** COVID-19, SARS receptor, obesity, hypertension, asthma, COPD, comorbidity

80 **Word counts:** 5 396

81

## 82 Introduction

83 A novel coronavirus SARS-CoV-2 leading to COVID-19 was identified for the first time in  
84 December 2019 and as of today has infected already more than 4.3 million and killed more than 290  
85 000 people worldwide (as of 13<sup>th</sup> of May 2020) <sup>1</sup>. SARS-CoV-2 virus has very high genome sequence  
86 similarity to two other human coronaviruses SARS-CoV and MERS-CoV <sup>2</sup>. Therefore, it is highly  
87 possible that SARS-CoV-2 uses similar approaches to cell entry and replication in various cells and  
88 tissues. In fact, it is already known that SARS-CoV-2 uses the same receptor ACE2 to enter the cells  
89 via its structural spike glycoprotein (S), yet with much higher affinity, which might translate to the  
90 massive SARS-CoV-2 spread as compared to SARS-CoV <sup>3</sup>. Host transmembrane protease serine 2  
91 (TMPRSS2; encoded by *TMPRSS2*) cleaves spike protein into two subunits, which is a necessary step  
92 for the virus fusion to cellular membranes and entry the cell <sup>3</sup>. Recent structural studies revealed that  
93 this process can be potentially inhibited by BOAT1 (S6A19; encoded by *SLC6A19*), an amino acid  
94 transporter, presence of which may block the access of TMPRSS2 to the cleavage site on ACE2 <sup>4</sup> (Table  
95 S1).

96 The expression of ACE2 (encoded by *ACE2*) is very ubiquitous in the lung, heart, kidney and  
97 intestine, but it is rarely expressed in immune cells <sup>5,6</sup>. However, immune cells can be potentially  
98 infected by SARS-CoV-2, as in case of MERS-CoV and SARS-CoV <sup>7,8</sup>. Thus, it is highly possible that there  
99 are other receptors for virus entry in different cell types. Indeed, similarly with what has been shown  
100 in SARS-CoV, another receptor - CD147, called also basigin (encoded by *BSG*), has been recently  
101 shown to act as a receptor for SARS-CoV-2 in T cell lines and in cell lines of epithelial origin <sup>9,10</sup>.  
102 Interestingly, the same receptor is a putative receptor not only for SARS-CoV, but also for HIV-1 and  
103 measles, as well as is a receptor for malaria entry to erythrocytes <sup>11-14</sup>. An anti-CD147 antibody that  
104 blocks infection with SARS-CoV-2 *in vitro* and its humanized drug (meplazumab) has been already  
105 used in a clinical trial in patients with COVID-19 pneumonia. Meplazumab seemed to facilitate viral  
106 clearance, return to normal levels of lymphocyte count and decrease in CRP <sup>9,15</sup>. The percentage of  
107 improvement in patients with severe and critical COVID-19 presentations seemed higher in weekly  
108 meplazumab treatment compared to patients on the conventional treatment <sup>15</sup>.

109 CD147 is a transmembrane receptor interacting with several extracellular and intracellular  
110 partners forming a transmembrane supramolecular complex <sup>16</sup>. A group of extracellular molecules  
111 can bind and activate CD147 are cyclophilins A and B (encoded by *PPIA* and *PPIB*), acute phase protein  
112 S100A9, E-selectin (encoded by *SELE*) and platelet glycoprotein VI (encoded by *GP6*) <sup>17-20</sup>.  
113 Additionally, CD147 has three Asn glycosylation sites, to which high mannose-type and complex-type

114 glycans might bind <sup>21</sup>. Spike protein of SARS-CoV-2 is highly glycosylated <sup>22</sup>, which increases the  
115 chance of binding to the cells. It is possible that the virus can only attach to the cell surface and induce  
116 different cellular programs, leading to cell overactivation, exhaustion and death, especially in the  
117 severe phase of the disease, where cytokine storm and lymphopenia is commonly reported <sup>23</sup>.

118 Cyclophilins A and B have been shown to interact with non-structural protein 1 (nsp1) of  
119 SARS-CoV intracellularly <sup>24,25</sup>. They can be incorporated to the viral capsid and released, which further  
120 enables virus binding to CD147 and subsequent infection of CD147-expressing cells. Cyclophilins play  
121 a critical role in the replication process of HIV-1, HCV and many other viruses <sup>12,26</sup>. Cyclosporine A, a  
122 strong immunosuppressive agent acts mainly via binding to cellular cyclophilins. In the same  
123 mechanism, cyclosporine A suppresses replication of various coronaviruses <sup>27</sup>. Thus, cyclophilins  
124 were identified as targets for pan-coronavirus inhibitors <sup>28</sup>. Nevertheless, it is still not known if  
125 cyclophilins can interact with SARS-CoV-2.

126 Intracellular and transmembrane partners of CD147 are equally important in the infection  
127 process of HIV, measles and SARS-CoV. It has been shown that truncation of cytoplasmic tail of CD147  
128 prevents HIV infection <sup>29</sup>. Therefore, it is possible that these molecules can take part and regulate  
129 the process of SARS-CoV-2 entry through CD147 in a comparable way as TMPRSS2 and SLC6A19 for  
130 ACE2. Main transmembrane partners of CD147 with direct binding sites to CD147 are  
131 monocarboxylate transporters 1-4 (MCT1-MCT4; encoded by: *SLC16A1*, *SLC16A7*, *SLC16A8*,  
132 *SLC16A3*), main glucose transporter, GLUT-1 (encoded by *SLC2A1*) and CD44 (encoded by *CD44*), an  
133 important receptor for hyaluronan-main component of extracellular matrix <sup>30-32</sup>. CD147 also interacts  
134 intracellularly with integrins  $\alpha 3\beta 1$  and  $\alpha 6\beta 1$  (encoded by *ITGA3*, *ITGA6*, *ITGB1*) indirectly via CD98  
135 (*SLC7A5*), CD43 (*SPN*), MCT4 and galectin-3 (*LGALS3*) <sup>33-36</sup>. In addition, CD147 suppresses two  
136 important protein complexes by direct interaction: NOD2 (*NOD2*), an important innate immunity  
137 component and gamma-secretase complex, responsible for cleavage of beta-amyloid precursor from  
138 plasma membranes, encoded by *PSEN1*, *NCSTN*, *APH1A*, *APH1B*, *PSENEN* <sup>37,38</sup>. Due to the interactions  
139 with so many molecules, CD147 plays a crucial role in energy metabolism of the cell, motility,  
140 recruitment and activation, although the final outcome of its stimulation depends on the cell type  
141 and co-expression of the other molecules. However, the co-expression of these molecules in different  
142 cell types and across various human tissues is not known.

143 Importantly, in T cells CD147 suppresses T-cell receptor-dependent activation mainly by  
144 inhibition of nuclear factor of activated T-cells (NFATs) <sup>39,40</sup>. The NFAT family consists of five proteins:  
145 NF-ATc1 (encoded by *NFATC1*), NF-ATc2 (encoded by *NFATC2*), NF-ATc3 (encoded by *NFATC3*), NF-

146 ATc4 (encoded by *NFATC4*) and NF-AT5 (encoded by *NFAT5*)<sup>41,42</sup>. NFAT complex is a major  
147 transcriptional regulator in naive T cells and differentiated effector T cells, dependent on  
148 calcium/PLC $\gamma$ /calmodulin/calcineurin signaling<sup>41,42</sup>. It is also crucial in regulation of T cell anergy and  
149 in differentiation and function of T regulatory (Treg) cells<sup>42</sup>. CD147 has been reported as a marker of  
150 human Treg cells with highly suppressive activity<sup>43</sup>. NFAT signaling is also important in other cell  
151 types such as DCs, mast cells and B cells<sup>41</sup>. Since cyclophilins are regulators of NFAT activation, the  
152 extracellular binding of the virus through cyclophilin-CD147 complex, as well as intracellular  
153 interactions of cyclophilins with the virus proteins might be important in COVID-19 development.

154 CD26 (encoded by *DPP4*), has emerged recently as a potential receptor for SARS-CoV-2, due  
155 to the fact that it is a main cellular entry for MERS-CoV<sup>44,45</sup>. Recent structural studies predict that  
156 SARS-CoV-2 spike protein directly interact with CD26 on the host cells<sup>22</sup>. CD26 is a cell surface  
157 glycoprotein involved in T-cell receptor-mediated T-cell activation and proliferation. It is highly  
158 expressed in CD4 and CD8 T cells, and in lower quantities also in NK cells and DCs. As an additional  
159 function, it acts as a serine exopeptidase, cleaving peptides of various chemokines, growth factors  
160 and peptide hormones. Interestingly, it is also involved in extracellular matrix cleavage. It has been  
161 shown in human cells that several polymorphisms in CD26 gene reduce entry of MERS into the host  
162 cells<sup>46</sup>. It remains to be functionally determined if this protein can be a functional receptor for SARS-  
163 CoV-2.

164 The aim of our study was to analyze the gene expression of ACE2, CD147, cyclophilins, CD26  
165 and other SARS-CoV-2-related molecules in the broad range of primary human innate and adaptive  
166 immune cells and tissues, based on our own next generation sequencing data and public databases  
167 from different human cell types and across the diseases which are known to predispose to COVID-  
168 19.

169  
170

## 171 **Material and Methods**

172

### 173 **Study subjects, samples and study description**

174 We analyzed gene expression of SARS-CoV-2 receptors and related molecules' (Table S1) in a  
175 broad range of tissues and immune cells from the human RNA-seq databases generated by our *ex*  
176 *vivo* and *in vitro* approaches in the Swiss Institute of Asthma and Allergy Research (SIAF), by our  
177 collaborators or from the Gene Expression Omnibus (<http://www.ncbi.nlm.nih.gov/>). Baseline gene  
178 expression was evaluated *in vitro* in air liquid interface (ALI) - differentiated human primary bronchial  
179 epithelial cells (HBECs) (n=10). Direct *ex vivo* analyses of non-diseased human tissues included  
180 bronchial biopsies (n=5), bronchoalveolar lavage (BAL) cells (n=5) and skin biopsies (n=6). The other  
181 *ex vivo* investigated samples included whole blood (n=5), neutrophils (n=4), classical monocytes  
182 (n=4), plasmacytoid dendritic cells (pDCs) (n=4), innate lymphoid cells (ILC) 1, 2 and 3 (n=6 for each),  
183 natural killer cells (NK) (n=4), naïve CD4<sup>+</sup> T cells (n=4), terminal effector CD4<sup>+</sup> T cells (n=2), naïve  
184 CD8<sup>+</sup> T cells (n=4), effector memory CD8<sup>+</sup> T cells (n=4), naïve B cells (n=4) and plasmablasts (n=4) (for  
185 sorting markers please see Table S2) .

186 We further investigated different expression patterns of ACE-2-, CD147- and CD26- related  
187 genes in the context of potential COVID-19 risk factors, namely age, gender, smoking status, diagnosis  
188 of asthma, chronic obstructive pulmonary disease (COPD), hypertension, obesity, atopic dermatitis  
189 (AD) (Table S3). Briefly, we performed in-depth curated analysis of HBECs (Control = 5, Asthma = 6,  
190 COPD =5 ), bronchial biopsies (Control = 16, Asthma = 22, COPD = 3, Non-obese = 20, Obese = 21,  
191 Normotension = 32, Hypertension = 9, Non-smoker = 19, Smoker = 21, Female = 14, Male = 27), BAL  
192 fluid (Control = 16, Asthma = 22, COPD = 2, Non-obese = 19 Obese = 21, Normotension = 31,  
193 Hypertension = 9, Non-smoker = 19, Smoker = 20, Female = 14, Male = 26), whole blood (Control =  
194 17, Asthma = 21, COPD = 3, Non-obese = 20, Obese = 21, Normotension = 32, Hypertension = 9, Non-  
195 smoker = 19, Smoker = 21, Female = 14, Male = 27). In addition, we analyzed gene expression in  
196 PBMCs from infants and young children at age of 5-17 or 12-36 months (n=21 and 14, respectively),  
197 older children and adolescents at age of 4-16 years (n=16) and adults at age of 16-67 years (n=19),  
198 naïve CD4<sup>+</sup> T cells from children at age 12 months (n=18) and adults at age 20-35 years (n=4) and skin  
199 biopsies (control: n=6, atopic dermatitis: non lesional sites n=11, lesional sites n=11). All studies were  
200 accompanied by the relevant ethical permissions, given by the appropriate Institutional Review  
201 Board. Each control and diseased subject gave informed consent. Total RNA from evaluated cells and  
202 tissues was extracted and transcriptome was analyzed with use of RNA-seq approaches.

203 **Data processing**

204           Signatures of ACE2-, CD147- and CD26-related genes were curated from GSEA and MSigDB  
205 Database (Broad Institute, Massachusetts Institute of Technology, and Regents of the University of  
206 California) and from literature. Full sets of analyzed genes are described in the Table S1. Genes of  
207 interest were extracted from all data sets. RNA-seq data were processed with inhouse workflow  
208 available at <https://github.com/uzh/ezRun>. Significance threshold for differentially expressed genes  
209 was set to  $p < 0.05$  and was calculated for the entire gene lists in each project. All calculations  
210 between different conditions were done using the edgeR R package <sup>47</sup>. Spearman correlation  
211 coefficient was calculated using Hmisc R package, with the threshold for significance set to  $\alpha = 0.05$ .  
212 Correlation plots were done using Python's Seaborn library. Coexpression heatmaps as well as  
213 correlation heatmaps were done using the corrplot R package

214           Detailed description of each study is included in the Supplementary Methods and the Table  
215 S3.

216

217



218 **Results**

219

220 **ACE2 and related molecules are exclusively expressed at the barrier sites, whereas CD147,**  
221 **cyclophilins, CD26 and their interaction partners are ubiquitously expressed in immune cells and**  
222 **in epithelium**

223 First, we analyzed the baseline expression and co-expression of ACE2-, CD147- and CD26-  
224 related genes in several immune cell types from control, non-diseased adult individuals. In  
225 agreement with other recent reports, we observed the expression of *ACE2* mainly in epithelial  
226 tissues, such as human bronchial epithelial cells and bronchial and skin biopsies (Figure 1A and S1)  
227 <sup>6,48</sup>. *ACE2* was more abundant in the lung, when compared with the skin barrier sides. In bronchial  
228 biopsies *ACE2* was co-expressed with *TMPRSS2* (Figure S2). Also, in the skin *TMPRSS2* was very  
229 prominent, while we did not find *SLC6A19* in any of the analyzed cells and tissues (Figure 1B and S1).

230 None of the analyzed immune cells expressed *ACE2* (Figure 1A), *TMPRSS2* (Figure 1B) or  
231 *SLC6A19* (Figures S1-3), either in the local lung environment (BAL cells) or in the blood.

232 In contrast to *ACE2*, we observed a prominent expression of CD147 (*BSG*) in epithelial and  
233 innate and adaptive immune cells in the lung (BAL), in the skin and in circulation (whole blood,  
234 neutrophils, classical monocytes, pDCs, *ex vivo* sorted ILC, NK, naïve CD4<sup>+</sup> T cells, terminal effector  
235 CD4<sup>+</sup> T cells, naïve CD8<sup>+</sup> T cells, effector memory CD8<sup>+</sup> T cells, naïve B cells and plasmablasts) (Figure  
236 1C, Figures S1-S3). Interestingly, *ACE2* and CD147 (*BSG*) are not co-expressed in bronchial biopsy  
237 (Figure S2). High expression of CD147 (*BSG*) in primary human bronchial epithelial cells suggests that  
238 these cells having more than one receptor for SARS-CoV-2 entry could be infected in various  
239 conditions. Granulocytes and macrophages are the main source of CD147 (*BSG*) expression <sup>49</sup>, which  
240 may explain high CD147 (*BSG*) expression in the whole blood and BAL observed in our data. Presence  
241 of CD147 (*BSG*) on innate and adaptive memory immune cells may indicate the importance of this  
242 receptor in systemic inflammatory response and development of immunological memory.

243 Since it is not clear yet how exactly the process of infection via CD147 (*BSG*) takes place in  
244 case of SARS-CoV-2, we examined the presence and co-expression of extracellular partners of CD147  
245 (*BSG*), which are implicated in the infection with other viruses using CD147 (*BSG*) for cell entry,  
246 including SARS-CoV, HIV-1, measles and others <sup>11-13</sup>. All investigated cell populations showed high  
247 expression of cyclophilin A and B (*PPIA* and *PPIB*) (Figure 1D and E, Figure S1). Interestingly,  
248 cyclophilin A was highly expressed in all ILC. In addition, cyclophilin B was highly expressed in pDCs,  
249 ILC and plasmablasts. *S100A9* was highly expressed not only in bronchial epithelium, but also in the

250 whole blood, neutrophils, classical monocytes and, surprisingly, in naïve B cells (Figure 1F and Figure  
251 S1).

252 Next, we examined transmembrane and intracellular partners of CD147 (*BSG*), because its  
253 cytoplasmic tail, bound to many transmembrane partners, is essential in the entry of other viruses  
254 <sup>29</sup>. We observed that monocarboxylate transporters, such as *SLC16A7* (MCT2) and *SLC2A1* (GLUT1)  
255 are highly expressed not only at the barrier sites, but also in ILC (MCT2), pDCs, NK cells, T cells and B  
256 cells (MCT2, GLUT1) (Figure 1G and H). *CD44* is highly expressed in majority of cells, with the  
257 exceptionally high expression in BAL, classical monocytes, naïve CD4<sup>+</sup> T cells, terminal effector CD4<sup>+</sup>  
258 T cells, naïve CD8<sup>+</sup> T cells and effector memory CD8<sup>+</sup> T cells (Figure 1I). *ITGB1* (Integrin  $\beta$ -1) and other  
259 integrins are highly expressed in airway epithelial cells, but also other cells expressed them (Figure  
260 1J and Figure S1). NF-ATc1-3 (*NFATC1*, *NFATC2*, *NFATC3*) were expressed predominantly in CD4<sup>+</sup> and  
261 CD8<sup>+</sup> T and naïve B cells, whereas expression of *NFAT4* and *NFAT5* was higher in the lung and skin  
262 (Figure 1K and Figure S1).

263 Finally, we looked at the expression of CD26 (*DPP4*). Notably, it was expressed highly in all  
264 ILC, and in naïve CD4<sup>+</sup> and CD8<sup>+</sup> T cells, as well as in pDCs and effector memory CD8<sup>+</sup> T cells (Figure  
265 1L and Figure S1).

266

### 267 **Distinct expression profiles of ACE2-, CD147-, and CD26-related genes in PBMCs and T cells of** 268 **children, adolescents and adults**

269 Clinical evidence from COVID-19 patients worldwide clearly demonstrate an association  
270 between disease severity and morbidity with age <sup>1</sup>. In China, less than 1% of the SARS-CoV-2 positive  
271 cases were in children younger than 10 years of age <sup>50,51</sup>. Therefore, we analyzed expression patterns  
272 of ACE2-, CD147-, and CD26-related genes in peripheral blood mononuclear cells (PBMCs) from  
273 infants, young children, adolescents and adults. While these comparisons can be limited due to the  
274 different distribution of immune subsets in the blood of children and adults <sup>52</sup> and different ethnicity  
275 of children (African American from South Africa and Tanzania) compared to adolescents and adults  
276 (Caucasians), we observed that there are different patterns of expression for the majority of analyzed  
277 genes (Figure 2A). We observed that CD147 (*BSG*) was highly expressed in PBMCs of children,  
278 whereas its expression was lower in adolescents and in adults. Similarly, to CD147 (*BSG*), cyclophilins  
279 B (*PP1B*), *S100A9*, *SLC3A2* (CD98), *SLC16A1* (MCT1), *NFATC4* were less expressed in adults. On the  
280 other hand, *SLC16A3* (MCT4), *SLC16A7* (MCT2), *NFATC2*, *NFAT5*, *NFATC1*, *NFATC3*, integrins (*ITGB1*)

281 were expressed on higher level in adults. Older children and adolescents showed intermediary gene  
282 expression between children and adults.

283 Next, we compared ACE2-, CD147- and CD26-related gene expression profile in the purified  
284 naïve CD4<sup>+</sup> T cells between young children and adults (Figure 2B). Low expression of ACE2-related  
285 genes was observed in both children and adults. Several CD147-related genes showed higher  
286 expression in adults, including *CD44*, certain MCTs, *SLC3A2* (CD98), *SLC2A1* (GLUT1), *NFATC1* and  
287 *NFATC3*. Also, CD26 (*DPP4*) was expressed at a higher level in adults. In contrast, other CD147-related  
288 genes were expressed at lower levels in adults, such as cyclophilins A and B (*PPIA* and *PPIB*), *S100A9*,  
289 *SLC7A5* (CD98), *LGALS3*, integrins (*ITGA6*, *ITGA3*) and *NFATC2*.

290

### 291 **Asthma, COPD, hypertension, smoking, obesity and gender show different expression profiles of** 292 **ACE2-, CD147-, and CD26-related genes**

293 We analyzed expression of ACE2-, CD147- and CD26-related genes from different cells and  
294 tissues in various comorbidities and risk factors, which have been shown, or are suspected to  
295 predispose to SARS-CoV-2 infection and/or COVID-19 progression. Upper and lower airways are the  
296 initial entry of SARS-CoV-2, thus we first analyzed gene expression in the HBECs and the bronchial  
297 biopsies from patients with asthma or COPD as compared to the non-diseased controls. In our  
298 cohorts, we did not see any significant difference in *ACE2* expression in HBECs or bronchial biopsy  
299 between control, asthma and COPD patients (Figure 3A and B). However, in bronchial biopsies *ACE2*  
300 expression was higher in smokers (Figure 3B). In HBECs, we observed higher expression of *TMPRSS2*  
301 in asthma (Figure 3A), raising the possibility that in asthmatic airways the cleavage of spike protein  
302 of SARS-CoV-2 might be more efficient. We also observed a trend of increased expression of CD147  
303 (*BSG*) in HBECs (Figure 3A) and in bronchial biopsies (Figure 3B) from COPD patients. Additionally,  
304 glucose transporter GLUT1 (*SLC2A1*), integrin  $\alpha$ -3 (*ITGA3*) and galectin-3 (*LGALS3*) were higher  
305 expressed in HBECs, whereas *SLC7A5* (CD98), integrins  $\alpha$ -3 (*ITGA3*) and  $\alpha$ -6 (*ITGA6*) were higher  
306 expressed in the bronchial biopsies of COPD patients. *CD44* and *APOD* were higher expressed in  
307 asthma (Figure 3A, B and Figures S4, S5). In bronchial biopsies, ACE2-, CD147- and CD26-related genes  
308 showed similar cluster of co-expression in control and asthma (Figure S2 and S6). Interestingly, *ACE2*  
309 co-expressed with *PPIB* and *NME1* in asthma, which was not found in controls (Figure S6). Taken  
310 together, airway epithelium in asthma and COPD showed a gene signature that potentially can  
311 facilitate SARS-CoV-2 entry and enhance internalization after receptor binding.

312 Next, we analyzed BAL and whole blood gene expression in patients with asthma and controls  
313 (Figure 3 C, D and Figure S7, S8). Unfortunately, we have access to the limited number of BAL samples  
314 from COPD patients. In BAL, which reflects local lung immune microenvironment, and in blood,  
315 reflecting systemic immune responses, CD147 (*BSG*) was expressed equally high in asthma patients  
316 and in controls (Figure 3C, Figure S7). In blood, patients with asthma had also higher expression of  
317 integrin *ITGA6* and *NFATC2*, as compared to controls (Figure 3D). There was a greater abundance in  
318 the cluster of co-expressed genes in asthma in BAL and especially in blood (Figure S9, S10). In asthma  
319 patients, *BSG* (CD147) showed co-expression with *SLC7A5* (CD98) in blood, *DPP4* (CD26) also co-  
320 expressed with *CD44* and *ITGA6* (Figure S10).

321 Next, we analyzed the ACE2-, CD147- and CD26- related gene expression in our controls,  
322 asthma and COPD patients according to the additional clinical features, which have been reported as  
323 a risk factor comorbidity for COVID-19, such as hypertension, smoking, gender and obesity<sup>23,53</sup>. We  
324 did not see any major differences in the gene expression in the bronchial biopsies based on these  
325 features, except higher *ACE2* expression in smokers (Figure 3B, Figure S5). However, we noted several  
326 important differences in the BAL and in the whole blood (Figure 3 C, D and Figure S7, S8). Subjects  
327 with hypertension had increased expression of cyclophilin A in both the BAL and blood, as well as  
328 upregulated expression of MCT4 (*SLC16A3*), *APH1A* and *PSENE1* in the BAL and MCT2 (*SLC16A7*) in  
329 the blood (Figure 3 C, D and Figure S7, S8). In case of smoking, expression of *S100A9* and *CD44* was  
330 elevated in both BAL (Figure 3C, Figure S7) and blood (Figure 3D, Figure S8). Obesity was an important  
331 factor leading to the significant changes in the BAL and blood. We observed that MCT4 (*SLC16A3*),  
332 integrin *ITGA3*, *NFATC1* and *PSENE1* were more expressed in the BAL of obese individuals (Figure 3C,  
333 Figure S7), whereas CD147 (*BSG*), *PPIA*, *LGALS3* and *NOD2* were more expressed in their blood (Figure  
334 3D). Finally, regarding gender in our cohort, MCT2 (*SLC16A7*), CD98 (*SLC7A5*), *NFATC2* were higher  
335 expressed in the BAL of male subjects (Figure 3C, Figure S7).

336

### 337 **Expression of CD147-related genes correlates with BMI and age in the BAL and blood**

338 Since obesity and age were important variables, we additionally correlated these two  
339 variables with the expression of ACE2-, CD147- and CD26-related genes in the bronchial biopsy, BAL  
340 and blood of our adult non-diseased and diseased cohorts. We did not find any significant  
341 correlations between BMI and age and the receptor-related gene expression in the bronchial  
342 biopsies. However, we noted that the expression of *SLC16A3* (MCT4), *ITGA3*, *LGALS3* in BAL positively  
343 correlated with BMI (Figure 4A-C) and the expression of *CD44* positively correlated with the age of

344 the subjects (Figure 4D). Interestingly, whole blood expression of CD147 (*BSG*), *PPIA*, *S100A9*, *CD44*  
345 and *LGALS3* correlated positively with the BMI, whereas *SLC16A3* positively correlated with age  
346 (Figure 4 E-J). In summary, these findings suggest that higher BMI and older age lead to higher  
347 expression of CD147-related genes on immune cells, but not on the barrier cells, which potentially  
348 can influence the development and the course of COVID-19.

349

### 350 **Eczema lesional skin in patients with atopic dermatitis present unique ACE2- and CD147-related** 351 **gene expression profile**

352 As we found a high expression of ACE2-, CD147- and CD26-related genes in the skin biopsies  
353 of healthy subjects, and since COVID-19-related skin lesions have been recently reported<sup>54</sup>, we also  
354 analyzed the biopsies of healthy and atopic dermatitis (AD) skin. Interestingly, in the lesional skin as  
355 compared to non-lesional skin of the same subjects, many CD147-related genes showed higher  
356 expression, including cyclophilins (*PPIA* and *PPIB*), *S100A9*, *CD44*, MCTs, *SLC7A5* (CD98) and integrins  
357 (Figure 5).

358

359

360

361

## 362 Discussion

363 COVID-19 pandemic is developing at such a pace that extraordinary actions are being initiated to  
364 learn quickly about its biology, transmission and potential means of prevention and treatment. In  
365 this spirit, we first performed an extensive literature and database search and curated a list of proven  
366 and potential receptors for SARS-CoV-2 and interaction partners, whose expression in different  
367 tissues and cells might be involved in the course of immunological response in COVID-19 (Figure 6)  
368 <sup>55</sup>. Next, we analyzed these genes in the broad spectrum of cell types and tissues in healthy controls  
369 to evaluate the level of their expression and their co-expression profiles, as well as evaluated their  
370 expression in healthy children, adolescents and adults. While interesting associations were observed  
371 to be age-dependent, these findings must be further explored and repeated due to the possibility of  
372 batch-specific systematic variations in the gene expression values between in-house and public  
373 datasets. Despite our efforts in applying identical data analysis workflow for the datasets produced  
374 by our group and those available in public repositories, different sequencing facilities and experiment  
375 protocols can lead to altered gene expression values, especially for genes with extreme gene length  
376 and G/C content. Finally, we analyzed gene expression in adults with known and potential COVID-19  
377 comorbidities and risk factors such as COPD, asthma, hypertension, obesity, smoking, male gender  
378 and AD. These conditions can be directly compared, as they were performed internally in the context  
379 of same project.

380 ACE2 is a receptor for SARS-CoV-2 <sup>3</sup>, whereas TMPRSS2 is a transmembrane host protease,  
381 which cleaves the viral spike protein thus facilitating virus fusion to the cellular membranes process  
382 (S) <sup>3,56</sup>. SLC6A19, physiologically a neutral amino acid transporter, potentially can block the access of  
383 TMPRSS2 to ACE2 and subsequently reduce active infection <sup>4,6</sup>. Our results, in agreement with recent  
384 reports <sup>6,57,58</sup>, indicate that airway epithelium has high ACE2 and TMPRSS2 co-expression, and no  
385 expression of protective SLC6A19 and thus might be highly susceptible for SARS-CoV-2 infection. In  
386 addition, it has been shown recently that ACE2 is highly expressed in naso- and oropharynx, which  
387 are the sites of active SARS-CoV-2 replication and a main source of infectious particles <sup>6,57,58</sup>.  
388 Interestingly, we observed high expression of ACE2 and TMPRSS2 in bronchial airway epithelium: in  
389 HBECs ALI cultures *in vitro*, as well as *in vivo* in humans in bronchial biopsies, indicating that they can  
390 be as important in initiation and progression of COVID-19, as recently shown for type II pneumocytes  
391 <sup>58</sup>. We have not observed the expression of SLC6A19 in any of the analyzed cells and tissues, yet it is  
392 known to be expressed in intestine <sup>59</sup>. Interestingly, in contrast to Leung and colleagues <sup>60</sup>, we have  
393 not seen higher expression of ACE2 in HBECs or bronchial biopsy of patients with COPD, but our

394 sample size was very limited, and potentially a bronchial biopsy site was different, which might be  
395 the reason of this inconsistency. However, consistently with this report <sup>61</sup>, we observed higher  
396 expression of ACE2 in the bronchial biopsy of current smokers, which might indicate that current  
397 smoking status, might be a stronger factor of increased ACE2 expression in airway epithelium than  
398 COPD per se. On the other hand, ACE2 and the angiotensin II type 2 receptor (AT2) were reported to  
399 protect from severe acute lung injury in mice <sup>62</sup>, therefore an importance of ACE2 in SARS-CoV-2  
400 infection and COVID-19 progression should be further explored. In addition, in HBECs of patients with  
401 asthma, we observed higher expression of TMPRSS2, which increases the possibility of SARS-CoV-2  
402 cleavage in asthmatic bronchi. Even though initially asthma was not reported to be a significant  
403 comorbidity for COVID-19, more observations from Europe and the US seem to show otherwise <sup>63</sup>. It  
404 might be related to the heterogeneity of asthma endotypes type 2 asthma (allergic) and non- type 2  
405 (non-allergic). Allergen exposure, allergic sensitization and high IgE lead to lower ACE2 expression in  
406 the nasal and bronchial epithelium of asthma patients <sup>64</sup>. Thus, it is possible that ACE2 expression in  
407 the airways of allergic patients, even if slightly protective in terms of infection with SARS-CoV-2,  
408 might also predispose to faster progression of COVID-19 to more severe forms, especially in case of  
409 higher TMPRSS2 expression.

410 We found that immune cells do not express ACE2, TMPRSS2 or SLC6A19, which has also been  
411 observed by others <sup>2,5</sup>. Importantly though, we found that CD147 and its extracellular agonists and  
412 transmembrane partners are highly expressed in innate and adaptive immune cells in the lungs and  
413 in the periphery, suggesting that they should be further investigated in SARS-CoV-2 spread and  
414 COVID-19 pathology <sup>9</sup>. Here, we report high expression of CD147 in both, epithelial tissues and innate  
415 and adaptive immune cells. Potentially, epithelial cells, macrophages, monocytes, ILCs, NK cells, T  
416 cells and B cells can be infected in the lungs or can carry SARS-CoV-2 from infected epithelial cells via  
417 CD147 and participate in the local and systemic spread of the virus, and in exaggerated immune  
418 response <sup>65</sup>.

419 We found here that CD147 is slightly higher expressed in the HBECs and bronchial biopsy of  
420 COPD patients, as well as it is higher expressed in the blood of obese individuals. Obesity is one of  
421 the main comorbidities reported in patients with severe COVID-19 <sup>63</sup>, and since CD147 expression in  
422 the whole blood correlates positively with BMI in our cohort, it certainly needs further attention in  
423 relation to COVID-19. Importantly, CD147 expression is upregulated by high glucose concentrations  
424 <sup>66</sup>, which might reflect its correlation with obesity, and potentially also with diabetes, another very  
425 important COVID-19 comorbidity. Additionally, extracellular ligands and transmembrane partners of

426 CD147 participate in the progress of other viral infections <sup>12</sup> in variety of mechanisms. Viruses  
427 integrate cyclophilin A and cyclophilin B in their virions and further can bind and either infect cells  
428 via 147 or activate CD147 signaling <sup>11-13</sup>. We found that expression of both cyclophilins (*PPIA* and  
429 *PPIB*) is increased in subjects with hypertension and obesity and *PPIA* correlated positively with BMI  
430 in the whole blood, which is confirmed in other studies <sup>67</sup>. In addition, nsp1 protein of SARS-CoV binds  
431 to CD147 via cyclophilins and reduces interferon responses <sup>25</sup> in infected cells. It also inhibits NF-ATs  
432 translocation activation in T cells, leading to suppression of immune responses <sup>25,68</sup>. Both  
433 mechanisms might be more potent in obese patients, especially with hypertension, due to higher  
434 expression of both cyclophilins on the periphery. Also, the other extracellular ligand of CD147-  
435 S100A9 correlated positively with BMI. CD147 transmembrane partners such as *LGALS3*, *MCT4*  
436 (*SLC16A3*), *MCT2* (*SLC16A7*), *ITGA3* and *NFATC1* were elevated in the blood or BAL of obese or  
437 hypertensive individuals, as well as the expression of *LGALS3*, *S100A9* and *CD44* correlated positively  
438 with BMI. Importantly in individuals who are current smokers *S100A9* and *CD44* are elevated in the  
439 BAL and in the blood. MCTs regulate the transport of lactate, pyruvate and ketone bodies across the  
440 cell membrane <sup>69</sup>. Galectin-3 (*LGALS3*) via CD147 signaling is responsible for disrupting cell-cell  
441 contact at the epithelial barriers <sup>70</sup>. *CD44* in acute inflammation triggered by hyaluronic acid lead to  
442 the cell activation and release of many proinflammatory cytokines whereas in the longer terms  
443 induce lung fibrosis <sup>71,72</sup>. Interestingly, it has been shown that patients who recovered from SARS-  
444 CoV have spike protein- specific memory cytotoxic T cells, which express *CD44* <sup>73</sup>. Thus, our results  
445 suggest a possible role of CD147 and its extracellular and intracellular ligands in COVID-19  
446 pathogenesis via regulation of cell metabolism, motility and activation, especially in patients with  
447 comorbidities. A clinical trial with anti-CD147 in COVID-19 patients seems to confirm its pleiotropic  
448 role in SARS-CoV-2 infection, but it requires further research to investigate the involved mechanisms  
449 and molecules.

450 Finally, expression of ACE2/TMPRSS2, CD147- and CD26- related genes in the skin biopsies  
451 highlights the potential roles of these molecules in various viral diseases. Recent studies reported  
452 that many COVID-19 cases developed nonpruritic, erythematous rashes, urticaria or varicella-like  
453 lesions <sup>54,74</sup>, but so far it is not known if they are a place of viral replication or just a local reaction to  
454 systemic infection. Similarly, not much is yet known about the potential connections between AD  
455 and the course of COVID-19 <sup>75</sup>. Yet, severe and untreated AD is a known risk factor for disseminated  
456 viral skin disease <sup>76</sup>. Therefore, our observations indicating higher expression of cyclophilins, *CD44*,



457 S100A9, integrins, MCTs and other CD147-related genes require further studies about their role in  
458 the course of SARS-CoV-2 infection in healthy subjects and in AD patients.

459 CD26 (*DPP4*) is another receptor important in coronavirus infection, described in MERS-CoV,  
460 potentially recognizing SARS-CoV-2 <sup>21,77</sup>. Similar to CD147, CD26 was expressed in all investigated cell  
461 types, except B cells. ILCs showed highest expression of DPP4 from all analyzed cells, which is in  
462 agreement with recent findings <sup>78</sup>. However, not much is known about the variable expression of  
463 CD26 among ILC1, ILC2 and ILC3. Potentially, a high level of CD26 on the surface of ILCs in the lung  
464 may be another mechanism of systemic spread of the virus.

465 The differential profile of ACE2-, CD147- and CD26-related gene expression in healthy subjects  
466 of different ages need to be interpreted with caution due to the distinct origins of these populations,  
467 as well as potential experimental bias (even if we performed normalization strategies, similar  
468 bioinformatic pipelines and cautious assessment of raw data quality, prior to analysis). Nevertheless,  
469 our observations are largely in agreement with other recent findings correlating gene expression in  
470 the whole blood and PBMCs with age <sup>79</sup>. Having this in mind, it is intriguing to observe that expression  
471 of NOD2, some MCTs, integrins and NFATs seemed to increase with age, whereas the expression of  
472 genes coding  $\gamma$ -secretase complex is decreasing with age in PBMCs. CD44 and MCT4 also correlated  
473 with age in BAL and blood, respectively. Moreover, some of the differences between children and  
474 adults, such as higher expression of CD26, CD44, GLUT1 (*SLC2A1*) and specific NFATs in adults were  
475 also observed in naïve purified CD4<sup>+</sup> T cells. This requires further investigation, but differences in  
476 expression pattern may be related to the striking differences in the morbidity of SARS-CoV-2  
477 between children and adults <sup>80</sup>.

478

479

480

481

482

483 **References**

484

- 485 1. Zhang JJ, Dong X, Cao YY, et al. Clinical characteristics of 140 patients infected with SARS-  
486 CoV-2 in Wuhan, China. *Allergy*. 2020.
- 487 2. Wu A, Peng Y, Huang B, et al. Genome Composition and Divergence of the Novel  
488 Coronavirus (2019-nCoV) Originating in China. *Cell Host Microbe*. 2020;27(3):325-328.
- 489 3. Hoffmann M, Kleine-Weber H, Schroeder S, et al. SARS-CoV-2 Cell Entry Depends on ACE2  
490 and TMPRSS2 and Is Blocked by a Clinically Proven Protease Inhibitor. *Cell*. 2020;181(2):271-  
491 280 e278.
- 492 4. Yan R, Zhang Y, Li Y, Xia L, Zhou Q. Structure of dimeric full-length human ACE2 in complex  
493 with B<sup>0</sup>AT1. *bioRxiv preprint*. 2020:2020.2002.2017.951848.
- 494 5. Ziegler C, Allon S, Nyquist S, et al. SARS-CoV-2 Receptor ACE2 is an Interferon-Stimulated  
495 Gene in Human Airway Epithelial Cells and Is Enriched in Specific Cell Subsets Across Tissues.  
496 *SSRN Electronic Journal*. 2020.
- 497 6. Wu C, Zheng, M. Single-cell RNA expression profiling shows that ACE2, the putative receptor  
498 for COVID-2019, has significant expression in nasal and mouth tissue and is co-expressed  
499 with TMPRSS2 and not co-expressed with SLC6A19 in the tissues. *PREPRINT (Version 1)*  
500 *available at Research Square*. 12 March 2020.
- 501 7. Chu H, Zhou J, Wong BH, et al. Middle East Respiratory Syndrome Coronavirus Efficiently  
502 Infects Human Primary T Lymphocytes and Activates the Extrinsic and Intrinsic Apoptosis  
503 Pathways. *J Infect Dis*. 2016;213(6):904-914.
- 504 8. Gu J, Gong E, Zhang B, et al. Multiple organ infection and the pathogenesis of SARS. *J Exp*  
505 *Med*. 2005;202(3):415-424.
- 506 9. Wang K, Chen W, Zhou Y-S, et al. SARS-CoV-2 invades host cells via a novel route: CD147-  
507 spike protein. *bioRxiv*. 2020:2020.2003.2014.988345.
- 508 10. Wang X, Xu W, Hu G, et al. SARS-CoV-2 infects T lymphocytes through its spike protein-  
509 mediated membrane fusion. *Cell Mol Immunol*. 2020.
- 510 11. Chen Z, Mi L, Xu J, et al. Function of HAb18G/CD147 in invasion of host cells by severe acute  
511 respiratory syndrome coronavirus. *J Infect Dis*. 2005;191(5):755-760.
- 512 12. Pushkarsky T, Zybarth G, Dubrovsky L, et al. CD147 facilitates HIV-1 infection by interacting  
513 with virus-associated cyclophilin A. *Proc Natl Acad Sci U S A*. 2001;98(11):6360-6365.
- 514 13. Watanabe A, Yoneda M, Ikeda F, Terao-Muto Y, Sato H, Kai C. CD147/EMMPRIN acts as a  
515 functional entry receptor for measles virus on epithelial cells. *J Virol*. 2010;84(9):4183-4193.
- 516 14. Zhang MY, Zhang Y, Wu XD, et al. Disrupting CD147-RAP2 interaction abrogates erythrocyte  
517 invasion by Plasmodium falciparum. *Blood*. 2018;131(10):1111-1121.
- 518 15. Bian H, Zheng Z-H, Wei D, et al. Meplazumab treats COVID-19 pneumonia: an open-labelled,  
519 concurrent controlled add-on clinical trial. *medRxiv*. 2020:2020.2003.2021.20040691.
- 520 16. Muramatsu T. Basigin (CD147), a multifunctional transmembrane glycoprotein with various  
521 binding partners. *J Biochem*. 2016;159(5):481-490.
- 522 17. Yurchenko V, Constant S, Eisenmesser E, Bukrinsky M. Cyclophilin-CD147 interactions: a new  
523 target for anti-inflammatory therapeutics. *Clin Exp Immunol*. 2010;160(3):305-317.
- 524 18. Hibino T, Sakaguchi M, Miyamoto S, et al. S100A9 is a novel ligand of EMMPRIN that  
525 promotes melanoma metastasis. *Cancer Res*. 2013;73(1):172-183.
- 526 19. Kato N, Yuzawa Y, Kosugi T, et al. The E-selectin ligand basigin/CD147 is responsible for  
527 neutrophil recruitment in renal ischemia/reperfusion. *J Am Soc Nephrol*. 2009;20(7):1565-  
528 1576.

- 529 20. Seizer P, Borst O, Langer HF, et al. EMMPRIN (CD147) is a novel receptor for platelet GPVI  
530 and mediates platelet rolling via GPVI-EMMPRIN interaction. *Thromb Haemost.*  
531 2009;101(4):682-686.
- 532 21. Huang W, Luo WJ, Zhu P, et al. Modulation of CD147-induced matrix metalloproteinase  
533 activity: role of CD147 N-glycosylation. *Biochem J.* 2013;449(2):437-448.
- 534 22. Vankadari N, Wilce JA. Emerging WuHan (COVID-19) coronavirus: glycan shield and  
535 structure prediction of spike glycoprotein and its interaction with human CD26. *Emerg*  
536 *Microbes Infect.* 2020;9(1):601-604.
- 537 23. Goyal P, Choi JJ, Pinheiro LC, et al. Clinical Characteristics of Covid-19 in New York City. *N*  
538 *Engl J Med.* 2020.
- 539 24. Wathelet MG, Orr M, Frieman MB, Baric RS. Severe acute respiratory syndrome coronavirus  
540 evades antiviral signaling: role of nsp1 and rational design of an attenuated strain. *J Virol.*  
541 2007;81(21):11620-11633.
- 542 25. Tanaka Y, Sato Y, Sasaki T. Suppression of coronavirus replication by cyclophilin inhibitors.  
543 *Viruses.* 2013;5(5):1250-1260.
- 544 26. Zhao K, Li J, He W, et al. Cyclophilin B facilitates the replication of Orf virus. *Virology*.  
545 2017;14(1):114.
- 546 27. de Wilde AH, Zevenhoven-Dobbe JC, van der Meer Y, et al. Cyclosporin A inhibits the  
547 replication of diverse coronaviruses. *J Gen Virol.* 2011;92(Pt 11):2542-2548.
- 548 28. Pfefferle S, Schopf J, Kogl M, et al. The SARS-coronavirus-host interactome: identification of  
549 cyclophilins as target for pan-coronavirus inhibitors. *PLoS Pathog.* 2011;7(10):e1002331.
- 550 29. Pushkarsky T, Yurchenko V, Laborico A, Bukrinsky M. CD147 stimulates HIV-1 infection in a  
551 signal-independent fashion. *Biochem Biophys Res Commun.* 2007;363(3):495-499.
- 552 30. Kirk P, Wilson MC, Heddle C, Brown MH, Barclay AN, Halestrap AP. CD147 is tightly  
553 associated with lactate transporters MCT1 and MCT4 and facilitates their cell surface  
554 expression. *EMBO J.* 2000;19(15):3896-3904.
- 555 31. Ait-Ali N, Fridlich R, Millet-Puel G, et al. Rod-derived cone viability factor promotes cone  
556 survival by stimulating aerobic glycolysis. *Cell.* 2015;161(4):817-832.
- 557 32. Slomiany MG, Grass GD, Robertson AD, et al. Hyaluronan, CD44, and emmprin regulate  
558 lactate efflux and membrane localization of monocarboxylate transporters in human breast  
559 carcinoma cells. *Cancer Res.* 2009;69(4):1293-1301.
- 560 33. Berditchevski F, Chang S, Bodorova J, Hemler ME. Generation of monoclonal antibodies to  
561 integrin-associated proteins. Evidence that alpha3beta1 complexes with  
562 EMMPRIN/basigin/OX47/M6. *J Biol Chem.* 1997;272(46):29174-29180.
- 563 34. Xu D, Hemler ME. Metabolic activation-related CD147-CD98 complex. *Mol Cell Proteomics.*  
564 2005;4(8):1061-1071.
- 565 35. Khunkaewla P, Schiller HB, Paster W, et al. LFA-1-mediated leukocyte adhesion regulated by  
566 interaction of CD43 with LFA-1 and CD147. *Mol Immunol.* 2008;45(6):1703-1711.
- 567 36. Priglinger CS, Szober CM, Priglinger SG, et al. Galectin-3 induces clustering of CD147 and  
568 integrin-beta1 transmembrane glycoprotein receptors on the RPE cell surface. *PLoS One.*  
569 2013;8(7):e70011.
- 570 37. Till A, Rosenstiel P, Brautigam K, et al. A role for membrane-bound CD147 in NOD2-  
571 mediated recognition of bacterial cytoinvasion. *J Cell Sci.* 2008;121(Pt 4):487-495.
- 572 38. Zhou S, Zhou H, Walian PJ, Jap BK. CD147 is a regulatory subunit of the gamma-secretase  
573 complex in Alzheimer's disease amyloid beta-peptide production. *Proc Natl Acad Sci U S A.*  
574 2005;102(21):7499-7504.

- 575 39. Yao H, Teng Y, Sun Q, et al. Important functional roles of basigin in thymocyte development  
576 and T cell activation. *Int J Biol Sci.* 2013;10(1):43-52.
- 577 40. Ruiz S, Castro-Castro A, Bustelo XR. CD147 inhibits the nuclear factor of activated T-cells by  
578 impairing Vav1 and Rac1 downstream signaling. *J Biol Chem.* 2008;283(9):5554-5566.
- 579 41. Muller MR, Rao A. NFAT, immunity and cancer: a transcription factor comes of age. *Nat Rev*  
580 *Immunol.* 2010;10(9):645-656.
- 581 42. Macian F. NFAT proteins: key regulators of T-cell development and function. *Nat Rev*  
582 *Immunol.* 2005;5(6):472-484.
- 583 43. Solstad T, Bains SJ, Landskron J, et al. CD147 (Basigin/Emmprin) identifies  
584 FoxP3+CD45RO+CTLA4+-activated human regulatory T cells. *Blood.* 2011;118(19):5141-  
585 5151.
- 586 44. Kim J, Yang YL, Jeong Y, Jang YS. Middle East Respiratory Syndrome-Coronavirus Infection  
587 into Established hDPP4-Transgenic Mice Accelerates Lung Damage Via Activation of the Pro-  
588 Inflammatory Response and Pulmonary Fibrosis. *J Microbiol Biotechnol.* 2020;30(3):427-438.
- 589 45. van Doremalen N, Miazgowicz KL, Milne-Price S, et al. Host species restriction of Middle East  
590 respiratory syndrome coronavirus through its receptor, dipeptidyl peptidase 4. *J Virol.*  
591 2014;88(16):9220-9232.
- 592 46. Kleine-Weber H, Schroeder S, Kruger N, et al. Polymorphisms in dipeptidyl peptidase 4  
593 reduce host cell entry of Middle East respiratory syndrome coronavirus. *Emerg Microbes*  
594 *Infect.* 2020;9(1):155-168.
- 595 47. Robinson MD, McCarthy DJ, Smyth GK. edgeR: a Bioconductor package for differential  
596 expression analysis of digital gene expression data. *Bioinformatics.* 2010;26(1):139-140.
- 597 48. Zou X, Chen K, Zou J, Han P, Hao J, Han Z. Single-cell RNA-seq data analysis on the receptor  
598 ACE2 expression reveals the potential risk of different human organs vulnerable to 2019-  
599 nCoV infection. *Front Med.* 2020.
- 600 49. Uhlen M, Fagerberg L, Hallstrom BM, et al. Proteomics. Tissue-based map of the human  
601 proteome. *Science.* 2015;347(6220):1260419.
- 602 50. Lu X, Zhang L, Du H, et al. SARS-CoV-2 Infection in Children. *N Engl J Med.*  
603 2020;382(17):1663-1665.
- 604 51. Wu Z, McGoogan JM. Characteristics of and Important Lessons From the Coronavirus  
605 Disease 2019 (COVID-19) Outbreak in China: Summary of a Report of 72314 Cases From the  
606 Chinese Center for Disease Control and Prevention. *JAMA.* 2020.
- 607 52. Erkeller-Yuksel FM, Deneys V, Yuksel B, et al. Age-related changes in human blood  
608 lymphocyte subpopulations. *J Pediatr.* 1992;120(2 Pt 1):216-222.
- 609 53. Watanabe M, Risi R, Tuccinardi D, Baquero CJ, Manfrini S, Gnessi L. Obesity and SARS-CoV-2:  
610 a population to safeguard. *Diabetes Metab Res Rev.* 2020:e3325.
- 611 54. Recalcati S. Cutaneous manifestations in COVID-19: a first perspective. *J Eur Acad Dermatol*  
612 *Venereol.* 2020.
- 613 55. Kursat Azkur A, Akdis M, Azkur D, et al. Immune response to SARS-CoV-2 and mechanisms of  
614 immunopathological changes in COVID-19. *Allergy.* 2020;In Press.
- 615 56. Wang Q, Zhang Y, Wu L, et al. Structural and Functional Basis of SARS-CoV-2 Entry by Using  
616 Human ACE2. *Cell.* 2020.
- 617 57. Sungnak W, Huang N, Becavin C, et al. SARS-CoV-2 entry factors are highly expressed in  
618 nasal epithelial cells together with innate immune genes. *Nat Med.* 2020.
- 619 58. Ziegler CGK, Allon SJ, Nyquist SK, et al. SARS-CoV-2 receptor ACE2 is an interferon-  
620 stimulated gene in human airway epithelial cells and is detected in specific cell subsets  
621 across tissues. *Cell.* 2020.

- 622 59. Bröer S. The role of the neutral amino acid transporter B0AT1 (SLC6A19) in Hartnup disorder  
623 and protein nutrition. *IUBMB life*. 2009;61(6):591-599.
- 624 60. Leung JM, Yang CX, Tam A, et al. ACE-2 Expression in the Small Airway Epithelia of Smokers  
625 and COPD Patients: Implications for COVID-19. *European Respiratory Journal*.  
626 2020:2000688.
- 627 61. Leung JM, Yang CX, Tam A, et al. ACE-2 Expression in the Small Airway Epithelia of Smokers  
628 and COPD Patients: Implications for COVID-19. *Eur Respir J*. 2020.
- 629 62. Imai Y, Kuba K, Rao S, et al. Angiotensin-converting enzyme 2 protects from severe acute  
630 lung failure. *Nature*. 2005;436(7047):112-116.
- 631 63. Goyal P, Choi JJ, Pinheiro LC, et al. Clinical Characteristics of Covid-19 in New York City. *New  
632 England Journal of Medicine*. 2020.
- 633 64. Jackson DJ, Busse WW, Bacharier LB, et al. Association of Respiratory Allergy, Asthma and  
634 Expression of the SARS-CoV-2 Receptor, ACE2. *J Allergy Clin Immunol*. 2020.
- 635 65. Peng L, Liu J, Xu W, et al. SARS-CoV-2 can be detected in urine, blood, anal swabs and  
636 oropharyngeal swabs specimens. *J Med Virol*. 2020.
- 637 66. Bao W, Min D, Twigg SM, et al. Monocyte CD147 is induced by advanced glycation end  
638 products and high glucose concentration: possible role in diabetic complications. *Am J  
639 Physiol Cell Physiol*. 2010;299(5):C1212-1219.
- 640 67. Zhang H, Fan Q, Xie H, et al. Elevated Serum Cyclophilin B Levels Are Associated with the  
641 Prevalence and Severity of Metabolic Syndrome. *Frontiers in Endocrinology*. 2017;8(360).
- 642 68. Hahn JN, Kaushik DK, Yong VW. The role of EMMPRIN in T cell biology and immunological  
643 diseases. *J Leukoc Biol*. 2015;98(1):33-48.
- 644 69. Halestrap AP. The monocarboxylate transporter family--Structure and functional  
645 characterization. *IUBMB Life*. 2012;64(1):1-9.
- 646 70. Darmoul D, Voisin T, Couvineau A, et al. Regional expression of epithelial dipeptidyl  
647 peptidase IV in the human intestines. *Biochem Biophys Res Commun*. 1994;203(2):1224-  
648 1229.
- 649 71. Li Y, Jiang D, Liang J, et al. Severe lung fibrosis requires an invasive fibroblast phenotype  
650 regulated by hyaluronan and CD44. *J Exp Med*. 2011;208(7):1459-1471.
- 651 72. Pure E, Cuff CA. A crucial role for CD44 in inflammation. *Trends Mol Med*. 2001;7(5):213-  
652 221.
- 653 73. Chen H, Hou J, Jiang X, et al. Response of memory CD8+ T cells to severe acute respiratory  
654 syndrome (SARS) coronavirus in recovered SARS patients and healthy individuals. *Journal of  
655 immunology (Baltimore, Md : 1950)*. 2005;175(1):591-598.
- 656 74. Bouaziz JD, Duong T, Jachiet M, et al. Vascular skin symptoms in COVID-19: a french  
657 observational study. *J Eur Acad Dermatol Venereol*. 2020.
- 658 75. Wollenberg A, Flohr C, Simon D, et al. European Task Force on Atopic Dermatitis (ETFAD)  
659 statement on severe acute respiratory syndrome coronavirus 2 (SARS-Cov-2)-infection and  
660 atopic dermatitis. *J Eur Acad Dermatol Venereol*. 2020.
- 661 76. Seegraber M, Worm M, Werfel T, et al. Recurrent eczema herpeticum - a retrospective  
662 European multicenter study evaluating the clinical characteristics of eczema herpeticum  
663 cases in atopic dermatitis patients. *J Eur Acad Dermatol Venereol*. 2019.
- 664 77. Vankadari N, Wilce JA. Emerging COVID-19 coronavirus: glycan shield and structure  
665 prediction of spike glycoprotein and its interaction with human CD26. *Emerging Microbes &  
666 Infections*. 2020;9(1):601-604.

- 667 78. Allan DSJ, Cerdeira AS, Ranjan A, et al. Transcriptome analysis reveals similarities between  
668 human blood CD3(-) CD56(bright) cells and mouse CD127(+) innate lymphoid cells. *Sci Rep.*  
669 2017;7(1):3501.
- 670 79. Peters MJ, Joehanes R, Pilling LC, et al. The transcriptional landscape of age in human  
671 peripheral blood. *Nat Commun.* 2015;6:8570.
- 672 80. Team CC-R. Coronavirus Disease 2019 in Children - United States, February 12-April 2, 2020.  
673 *MMWR Morb Mortal Wkly Rep.* 2020;69(14):422-426.  
674  
675

676 **Figure legend**

677

678 **Figure 1**

679 **ACE2 and TMPRSS2 are expressed at the barrier sites, whereas CD147, cyclophilins, CD26 and their**  
680 **interaction partners are present in immune cells and in epithelium.** Expression of **A) ACE2, B)**  
681 **TMPRSS2, C) BSG, D) PPIA, E) PPIB, F) S100A9, G) SLC16A7, H) SLC2A1, I) CD44, J) ITGB1, K) NFATC3,**  
682 **L) DPP4** genes in *in vitro* Air Liquid Interface (ALI) – differentiated human primary bronchial epithelial  
683 cells (n=10) and in *ex vivo* human primary bronchial biopsies (n=5), bronchoalveolar fluid cells (n=5),  
684 whole blood (n=5), neutrophils (n=4), classical monocytes (n=4), plasmocytoid dendritic cells (n=4),  
685 group 1, 2 and 3 innate lymphoid cells (n=6 per group), natural-killer cells (n=4), naïve CD4<sup>+</sup> T cells  
686 (n=4), terminal effector CD4<sup>+</sup> T cells (n=2), naïve CD8<sup>+</sup> T cells (n=4), effector memory CD8<sup>+</sup> T cells  
687 (n=4), naïve B cells (n=4), plasmablasts (n=4) and skin biopsies (n=6) from healthy adults. Data  
688 obtained from *in vitro* approaches are highlighted in red. Names of the proteins encoded by analysed  
689 genes are stated in the brackets. HBECs, human bronchial epithelial cells; Bronch. biop., bronchial  
690 biopsy; BAL, bronchoalveolar fluid cells; Class. monocytes, classical monocytes; pDCs, plasmocytoid  
691 dendritic cells; ILC1, group 1 innate lymphoid cells; ILC2, group 2 innate lymphoid cells, ILC3, group 3  
692 innate lymphoid cells; NK, natural killer cells; naïve CD4<sup>+</sup>, naïve CD4<sup>+</sup> T cells; term. Eff. CD4<sup>+</sup>, terminal  
693 effector CD4<sup>+</sup> T cells; naïve CD8<sup>+</sup>, naïve CD8<sup>+</sup> T cells, eff. mem. CD8<sup>+</sup>, effector memory CD8<sup>+</sup> T cells.

694

695 **Figure 2**

696 **Distinct expression profile of ACE2-, CD147-, and CD26-related genes in PBMCs and T cells of**  
697 **children and adults. A)** Expression of ACE2-, CD147-, NFAT- and CD-26-related genes in the primary  
698 human PBMCs in healthy children aged 5-17 months (n=21), 12-36 month (n=14), 4-16 years (n=16)  
699 and healthy adults aged 16-67 years (n=19). **B)** Expression of ACE2-, CD147-, NFAT- and CD-26-related  
700 genes in the primary human naïve CD4<sup>+</sup> T cells from 12 months old healthy children (n=18) and 20-  
701 35 years old healthy adults (n=4). All heatmaps display normalized gene expression across the groups  
702 (rows normalization). Color-coding represents gene families related with ACE2 (orange), CD147  
703 (green), NF-ATs (purple) and CD26 (yellow). MO, months old, YO, years old, PBMCs, peripheral blood  
704 mononuclear cells.

705

706 **Figure 3**

707 **Asthma, COPD, hypertension, smoking, obesity and gender is associated with differential**  
708 **expression of ACE2-, CD147-, and CD26-related genes in immune cells and tissues. A)** Differential  
709 expression of *ACE2*, *TMPRSS2*, *BSG*, *SLC2A1*, *CD44* and *ITGA3* genes in *in vitro* Air Liquid Interface  
710 (ALI) – differentiated human primary bronchial epithelial cells from non-diseased controls (n=5),  
711 asthma (n=6) and COPD (n=5) patients. **B)** Differential expression of *ACE2*, *BSG*, *SLC7A5*, *ITGA3*, *ITGA6*  
712 genes in bronchial biopsies from non-diseased controls (n=16), patients with asthma (n=22) and  
713 COPD (n=3), or in comparison of smokers (n=21) with non-smoking individuals (n=19). **C)** Differential  
714 expression of *BSG*, *PPIA*, *S100A9*, *CD44*, *SLC16A7*, *SLC16A3*, *ITGA3*, *NFATC1*, *NFATC2* genes in the  
715 bronchoalveolar fluid (BAL) from the control individuals (n=16), patients with asthma (n=22) and  
716 COPD (n=2), or in comparison of hypertensive (n=9) with normotensive (n=31) individuals; smokers  
717 (n=20) with non-smokers (n=19); obese (n=21) with non-obese (n=19); and males (n=26) with females  
718 (n=14). **D)** Differential expression of *BSG*, *PPIA*, *S100A9*, *CD44*, *SLC16A7*, *ITGA6*, *NFATC2*, *LGALS3* and  
719 *NOD2* genes in the whole blood of non-diseased controls (n=17), patients with asthma (n=21) and  
720 COPD (n=3), or in comparison of hypertensive (n=9) with normotensive (n=32) individuals; smokers  
721 (n=21), with non-smokers (n=19); obese (n=21) with non-obese individuals (n=20); and males (n=27)  
722 with females (n=14). Names of the proteins encoded by analyzed genes are stated in the brackets.  
723 \*p < 0.05, \*\*p < 0.01, \*\*\*p < 0.001, \*\*\*\*p < 0.0001. HBECS, human bronchial epithelial cells; Bronch.  
724 biop., bronchial biopsy; BAL, bronchoalveolar fluid cells; COPD, chronic obstructive pulmonary  
725 disease.

726

#### 727 **Figure 4**

728 **Expression of certain CD147-related genes correlates with BMI and age in the BAL and blood.**  
729 Correlation of **A)** *SLC16A3* expression and BMI, **B)** *ITGA3* expression and BMI, **C)** *LGALS3* expression  
730 and BMI, and **D)** *CD44* expression and age in the bronchoalveolar fluid (BAL). Correlation of **E)** *BSG*  
731 expression and BMI, **F)** *PPIA* expression and BMI, **G)** *S100A9* expression and BMI, **H)** *CD44* expression  
732 and BMI, **I)** *LGALS3* expression and BMI, **J)** *SLC16A3* and age in the whole blood. Spearman correlation  
733 coefficient (r) was calculated, with the threshold of significance set to p = 0.05. Names of the proteins  
734 encoded by analyzed genes are stated in the brackets. BAL, bronchoalveolar fluid cells; BMI, body-  
735 mass index.

736

#### 737 **Figure 5**



738 **Unique expression profile of ACE2- and CD147-related genes in lesional skin in patients with atopic**  
739 **dermatitis. A)** Expression of *ACE2*, *TMPRSS2*, *BSG*, *PPIA*, *PPIB*, *S100A9*, *CD44*, *SLC16A1*, *SLC16A3*,  
740 *SLC7A5*, *SLC3A2*, *SLC2A1*, *ITGA3*, *ITGA6*, *NFATC3*, *JUP*, *NME1*, *NOD2*, *SDC1* and *DPP4* genes in the skin  
741 of healthy controls (n=6) and in the lesional (n=11), and non-lesional (n=11) skin of atopic dermatitis  
742 patients. Names of the proteins encoded by analyzed genes are stated in the margins. \*P < 0.05, \*\*P  
743 < 0.01, \*\*\*P < 0.001, \*\*\*\*P < 0.0001.

744

#### 745 **Figure 6**

746 Summary of the tissue and cellular expression, and models of **A)** ACE2, **B)** CD147, **C)** CD26 and their  
747 interaction partners. Please refer to the text for further details. CypA, Cyclophilin A; CypB, Cyclophilin  
748 B; HA, Hyaluronic acid; Gal-3, Galectin 3; MCTs, Monocarboxylate transporters. Figure created with  
749 BioRender.com.

750

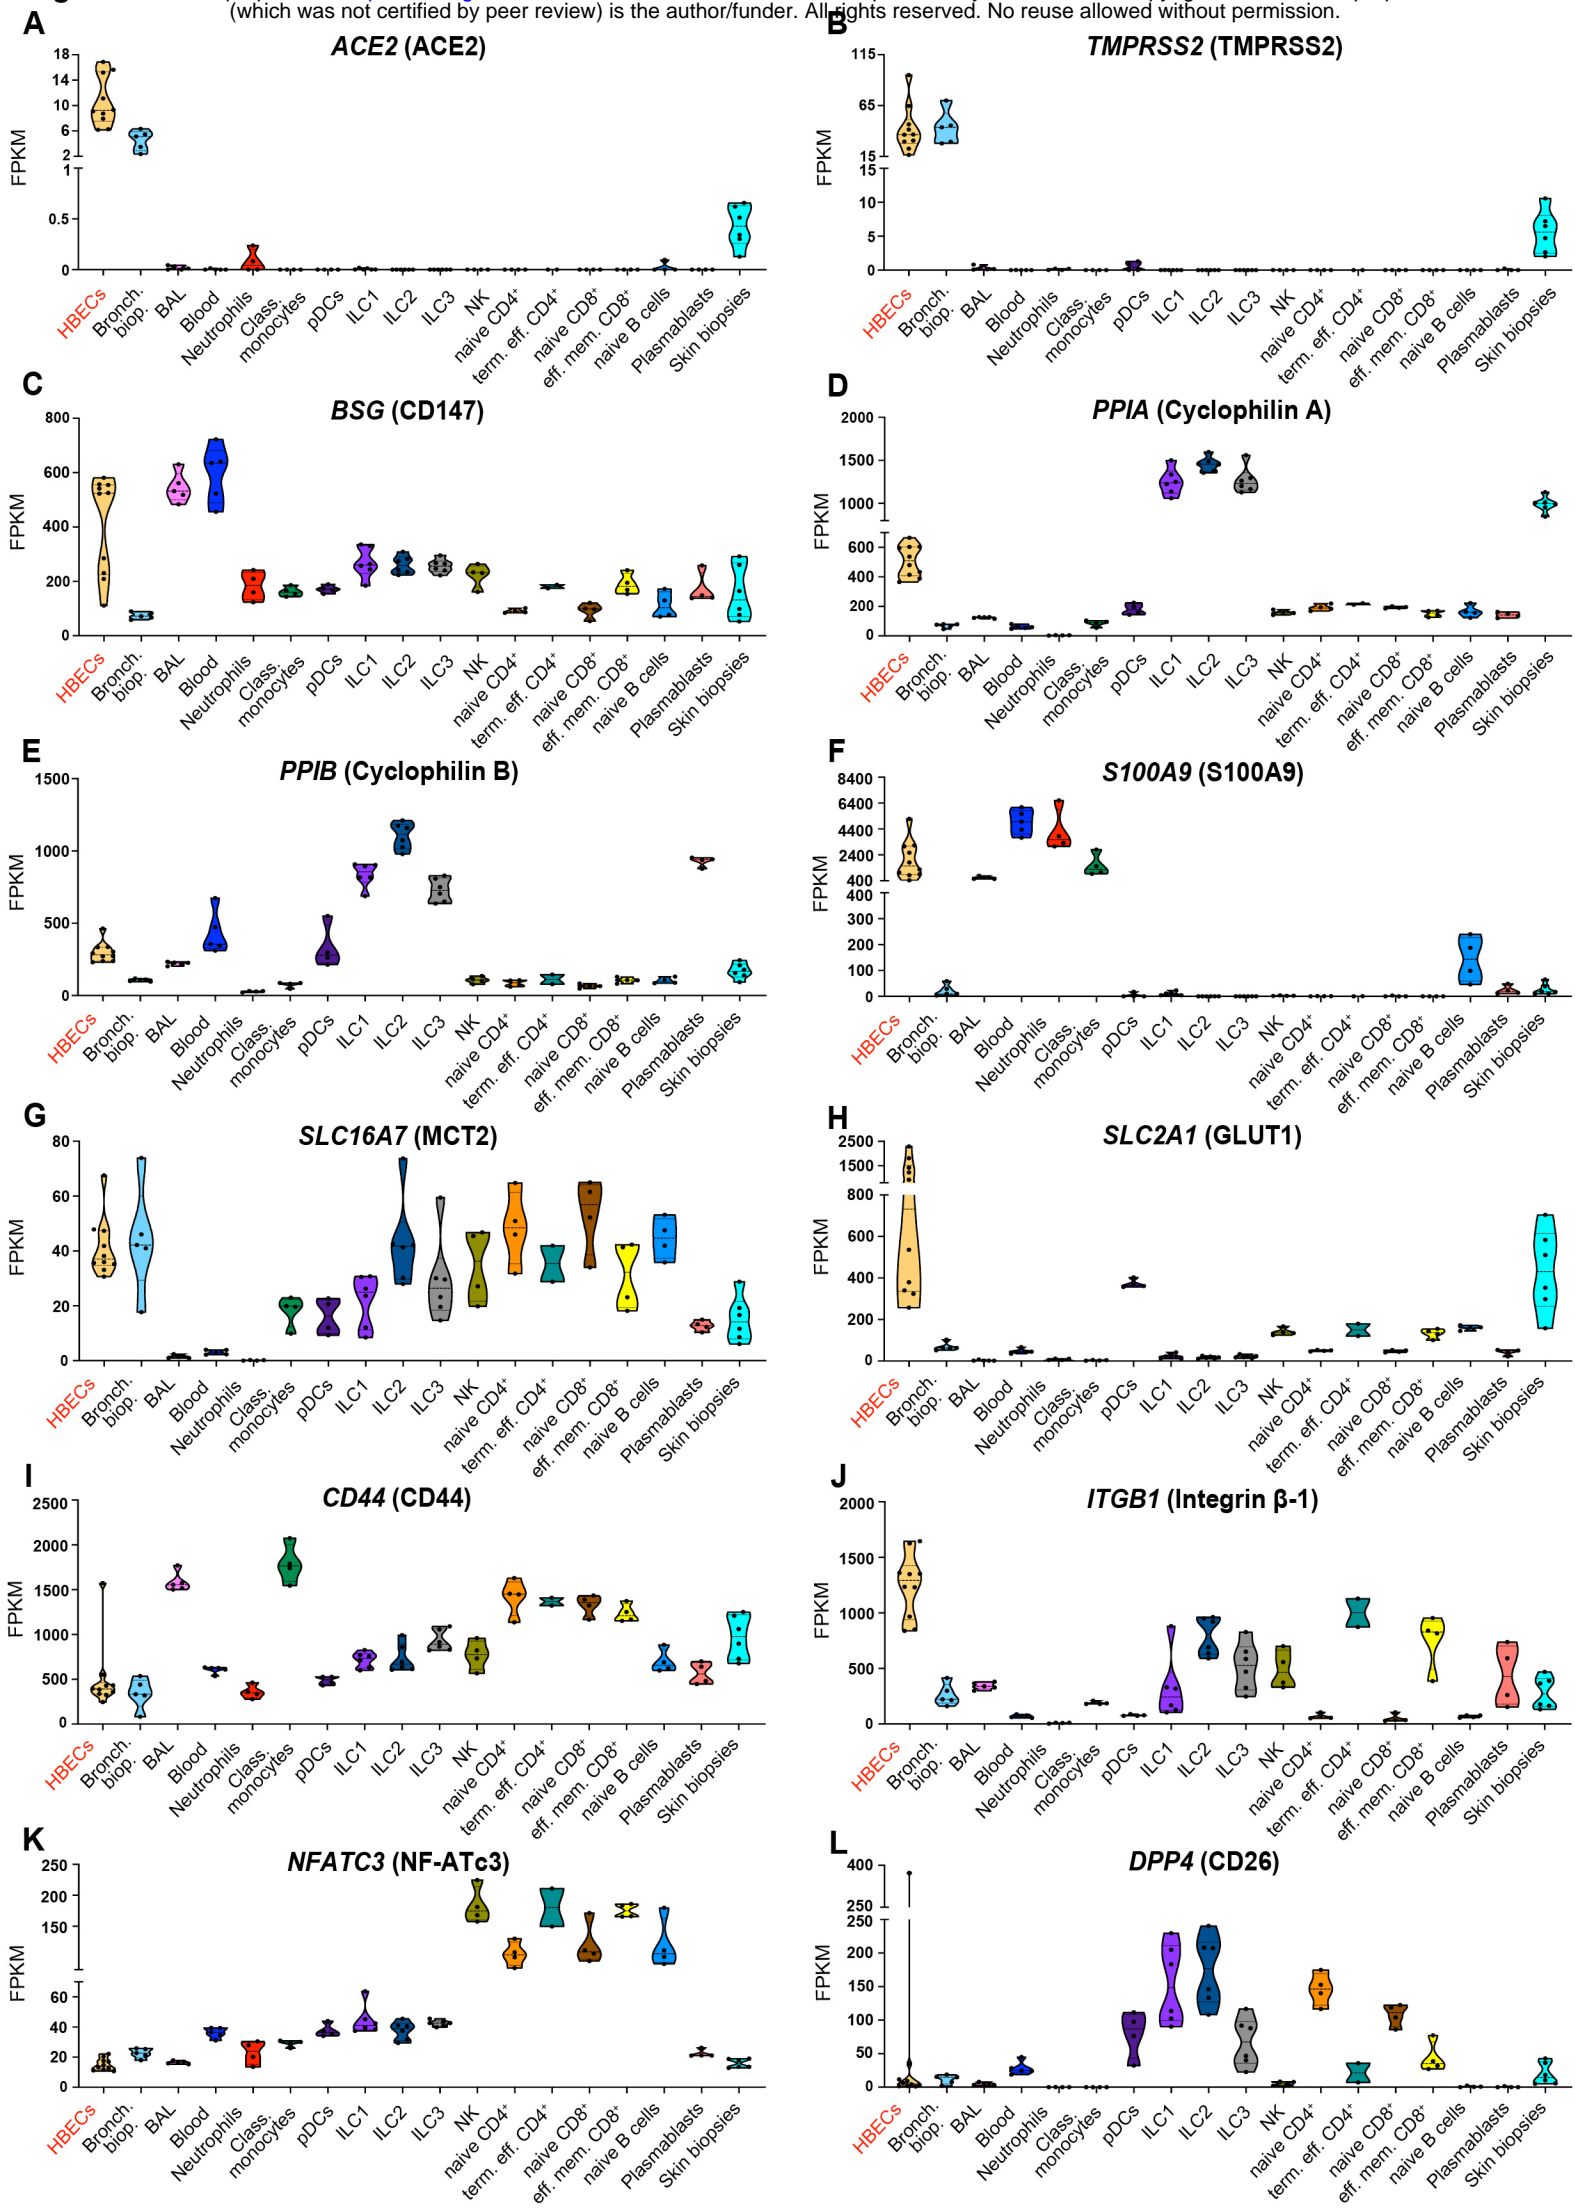

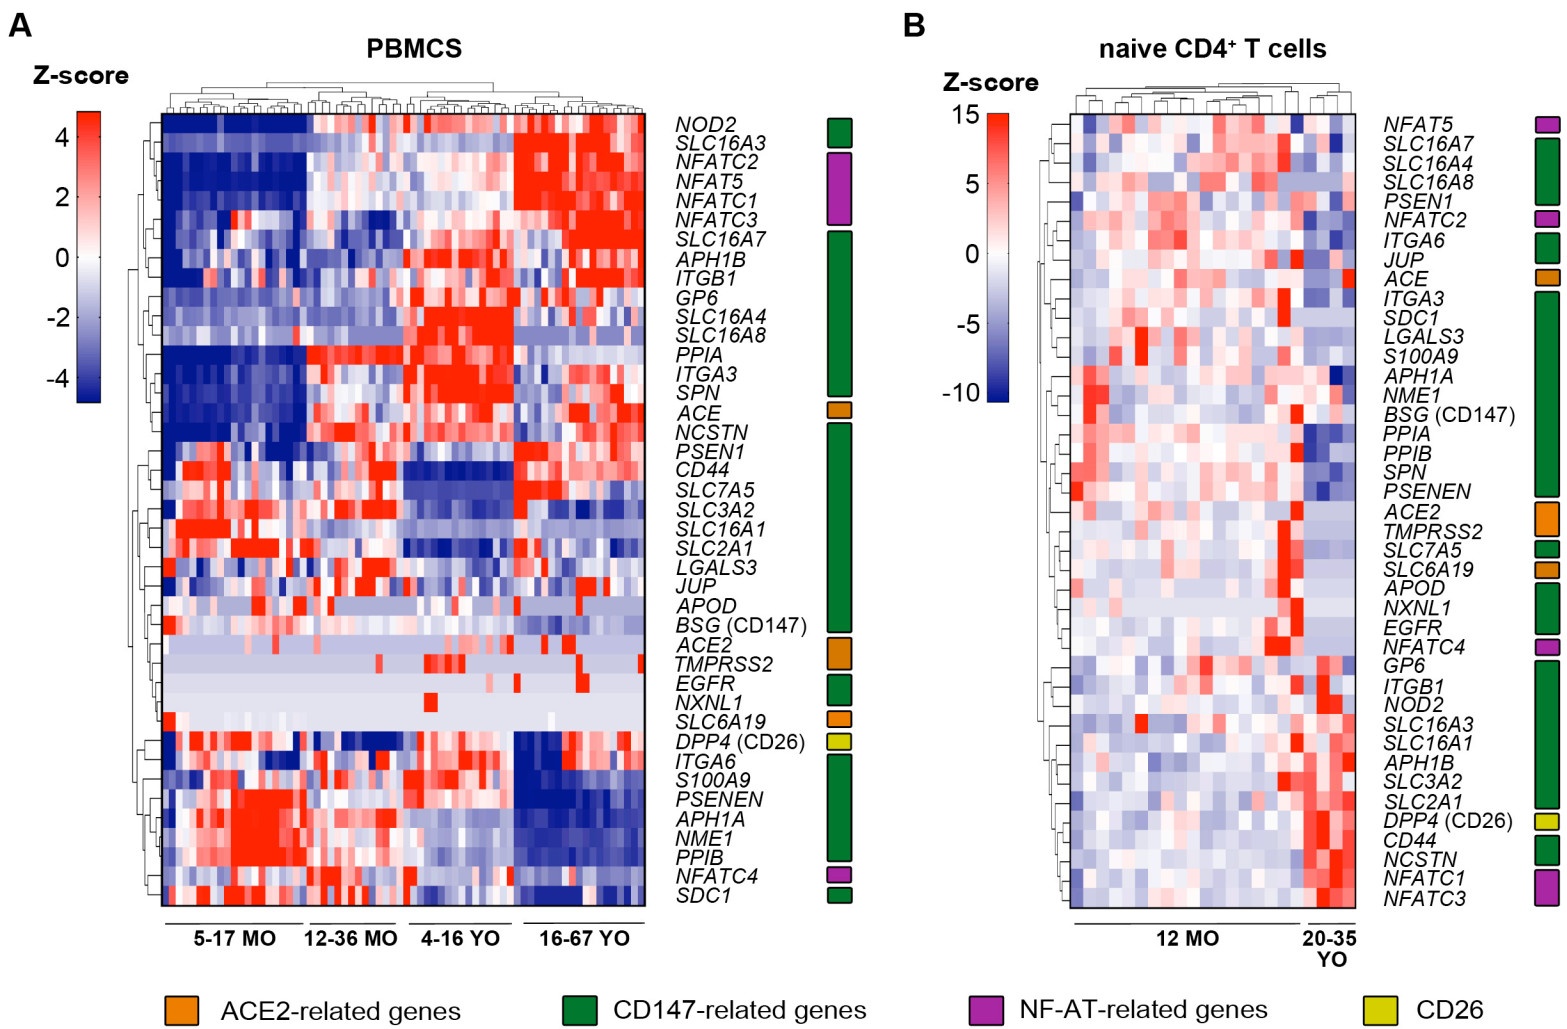

### Figure 3

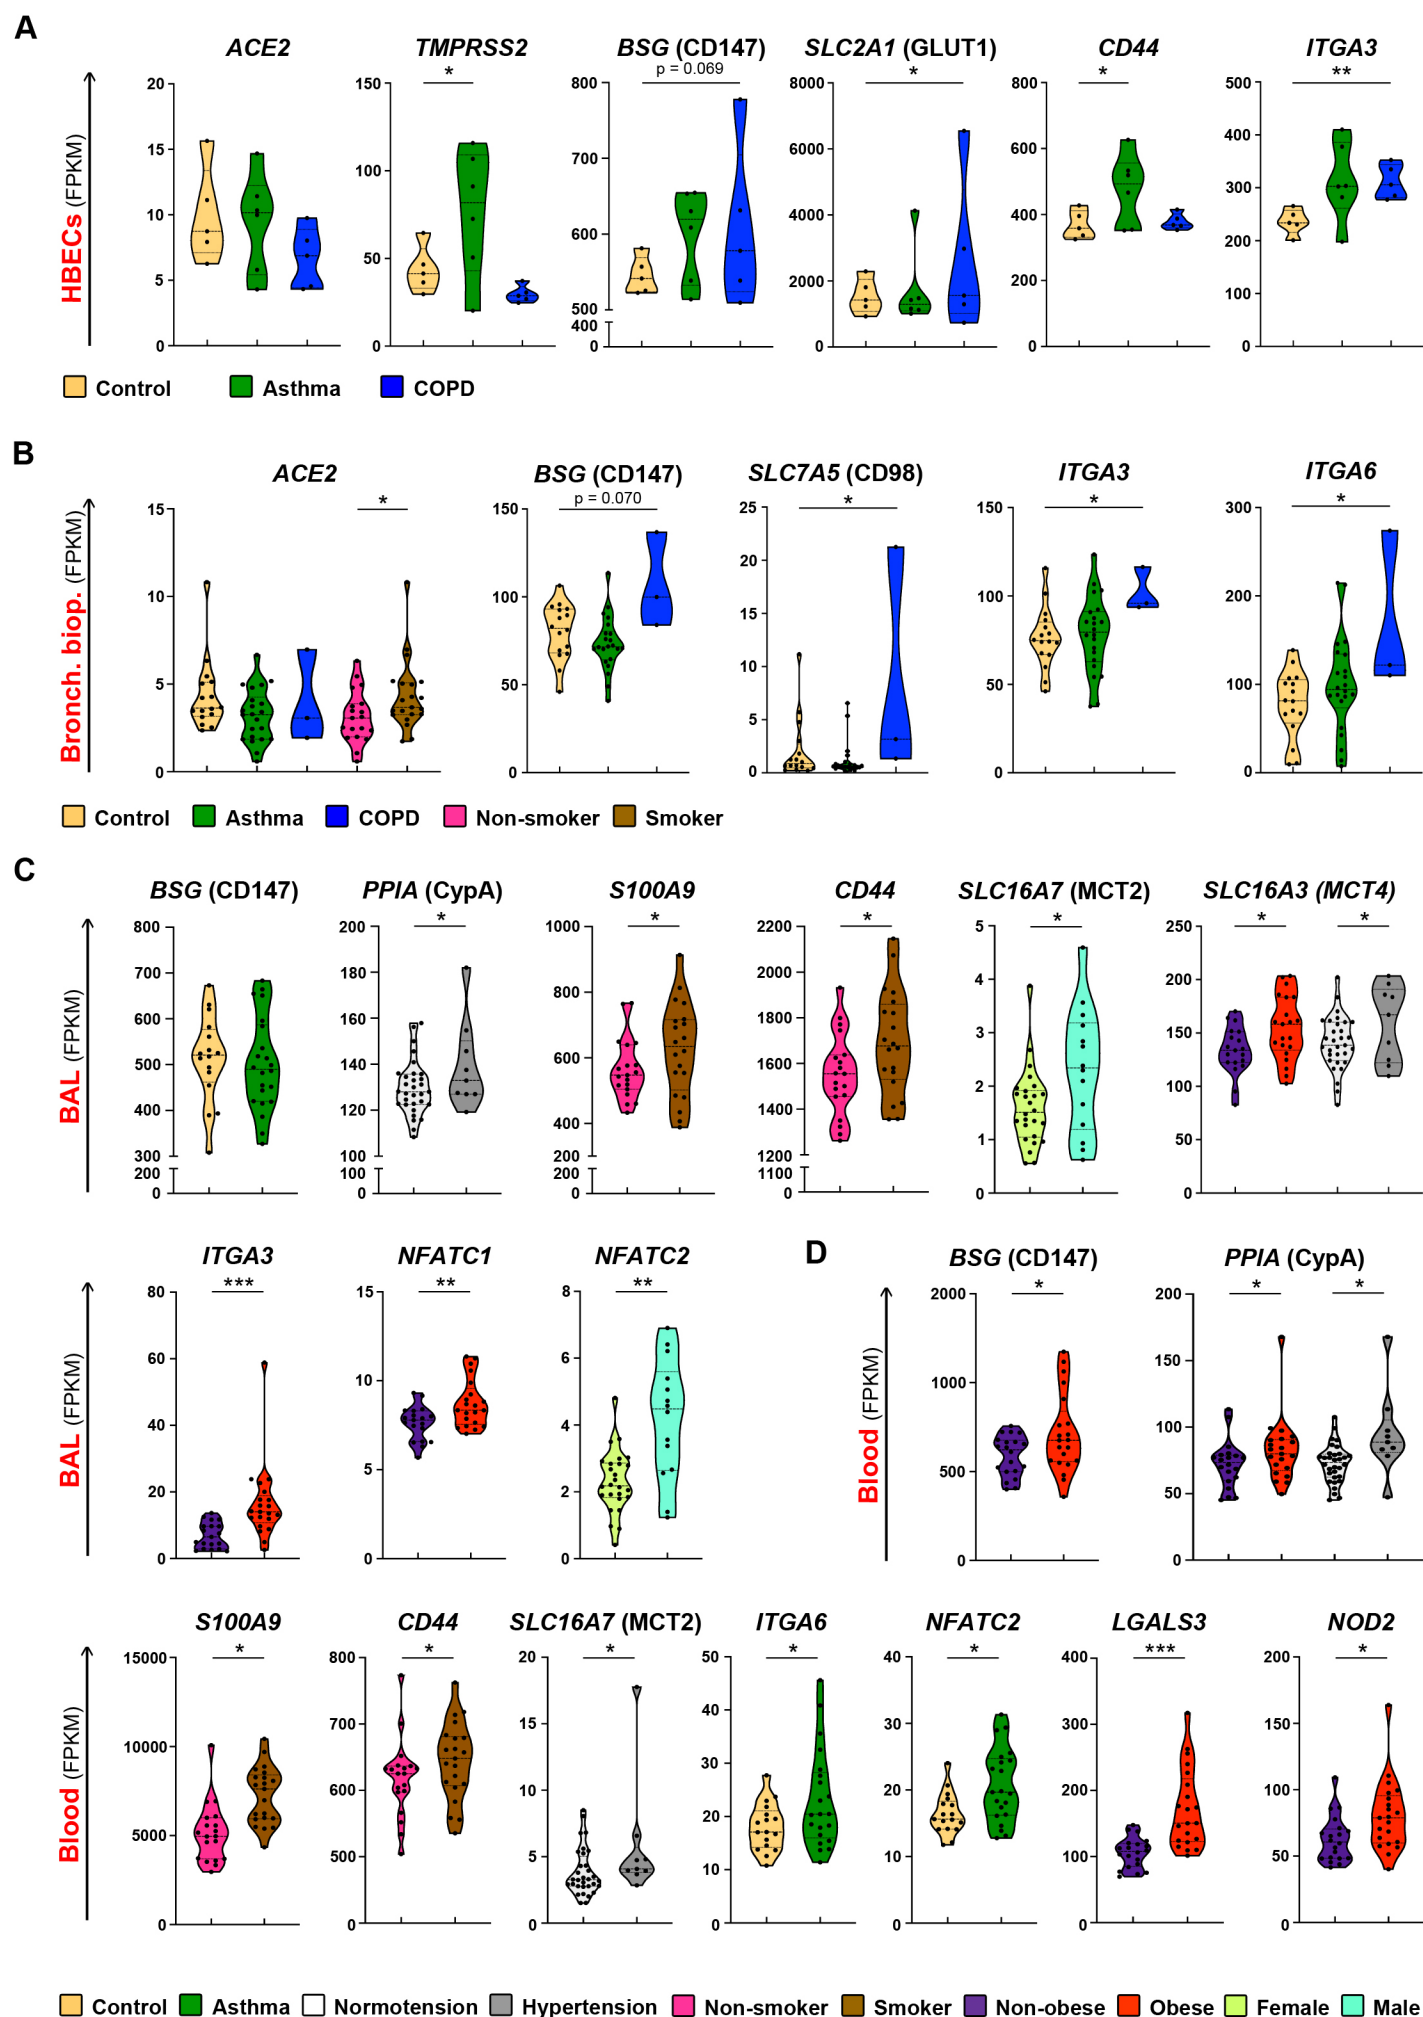

## Figure 4

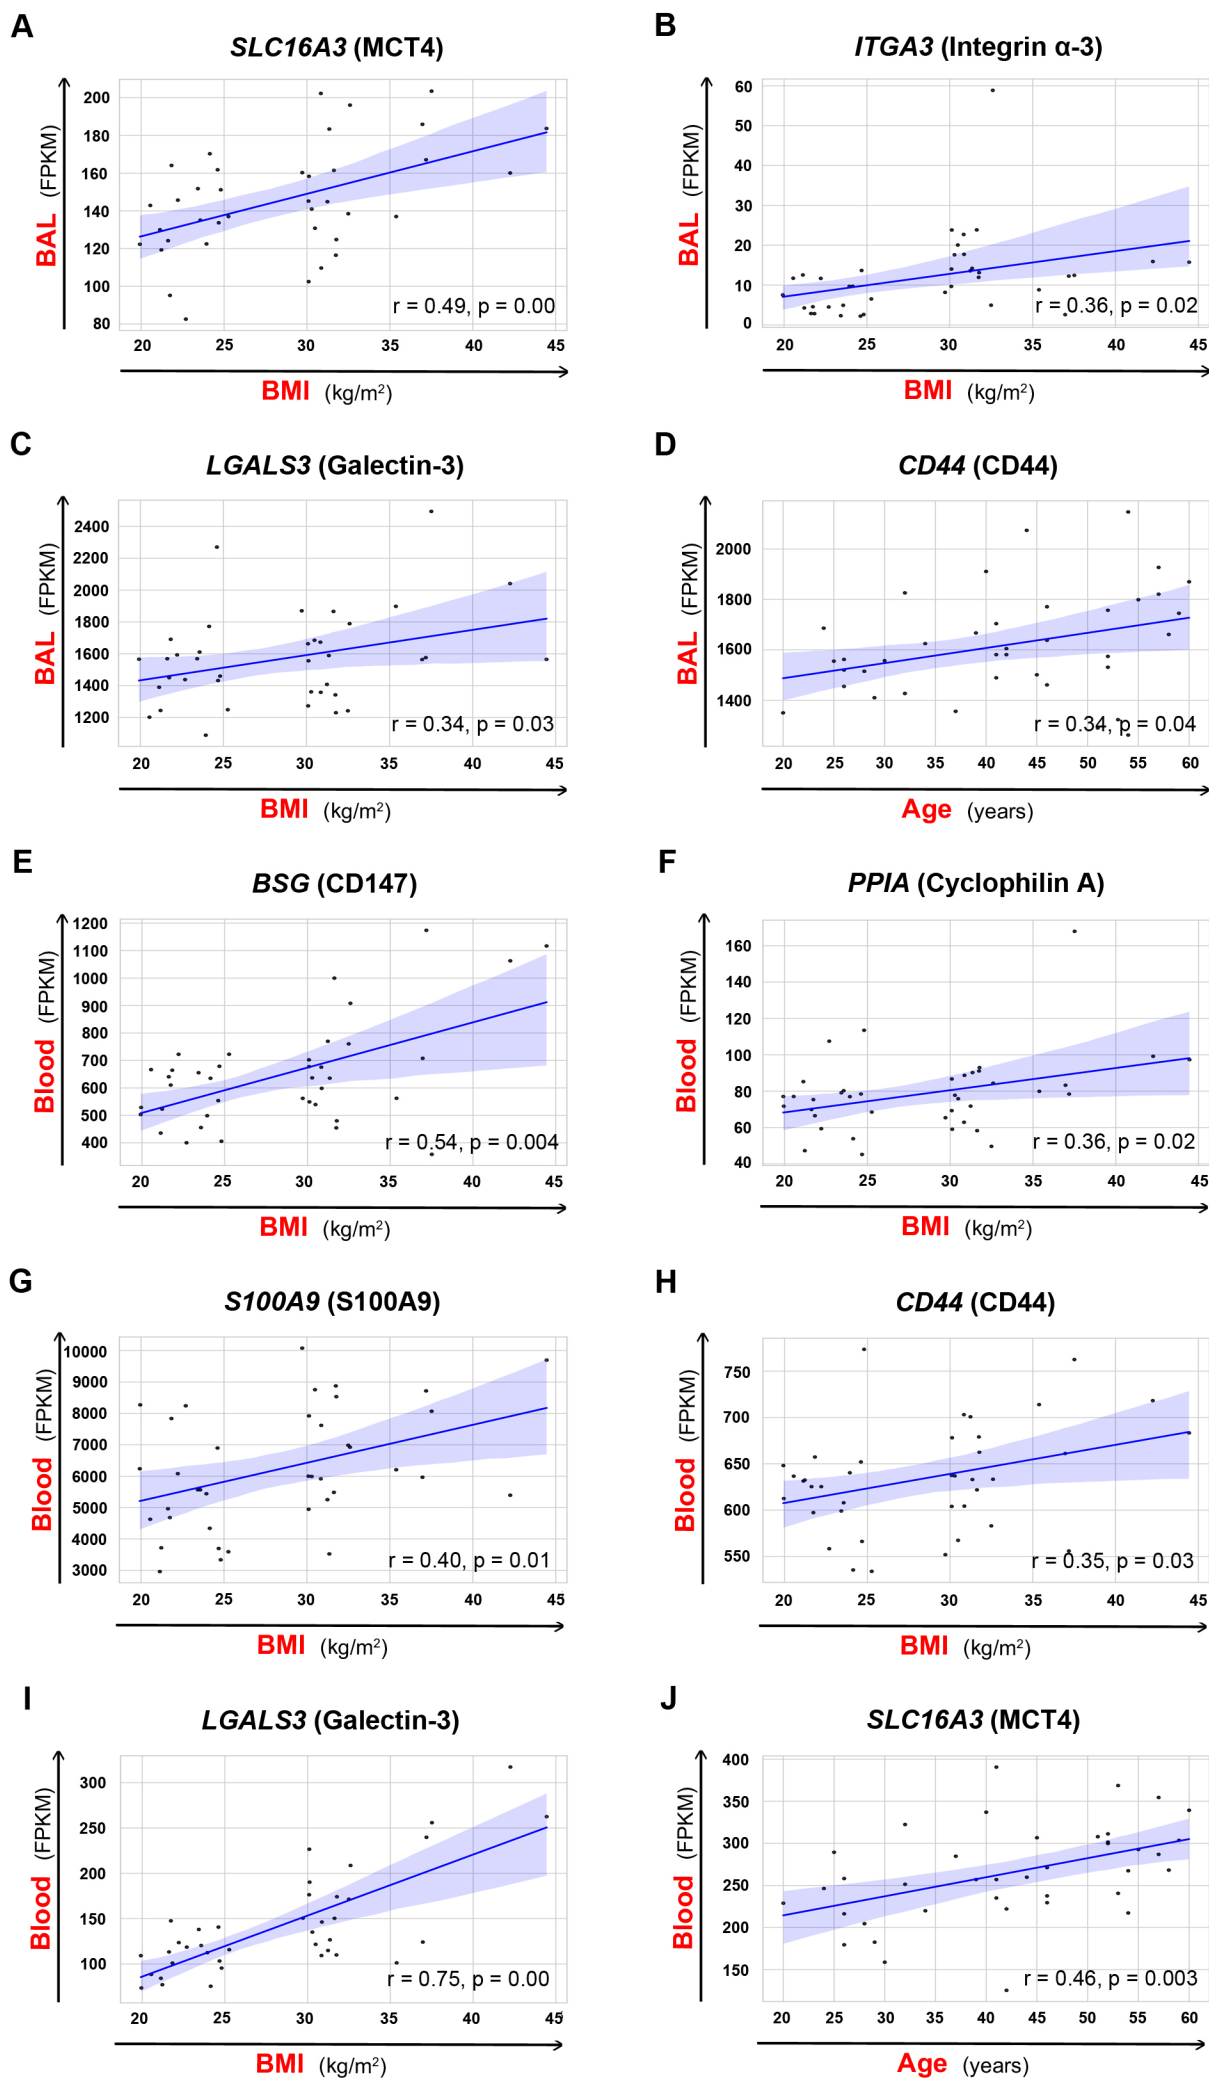

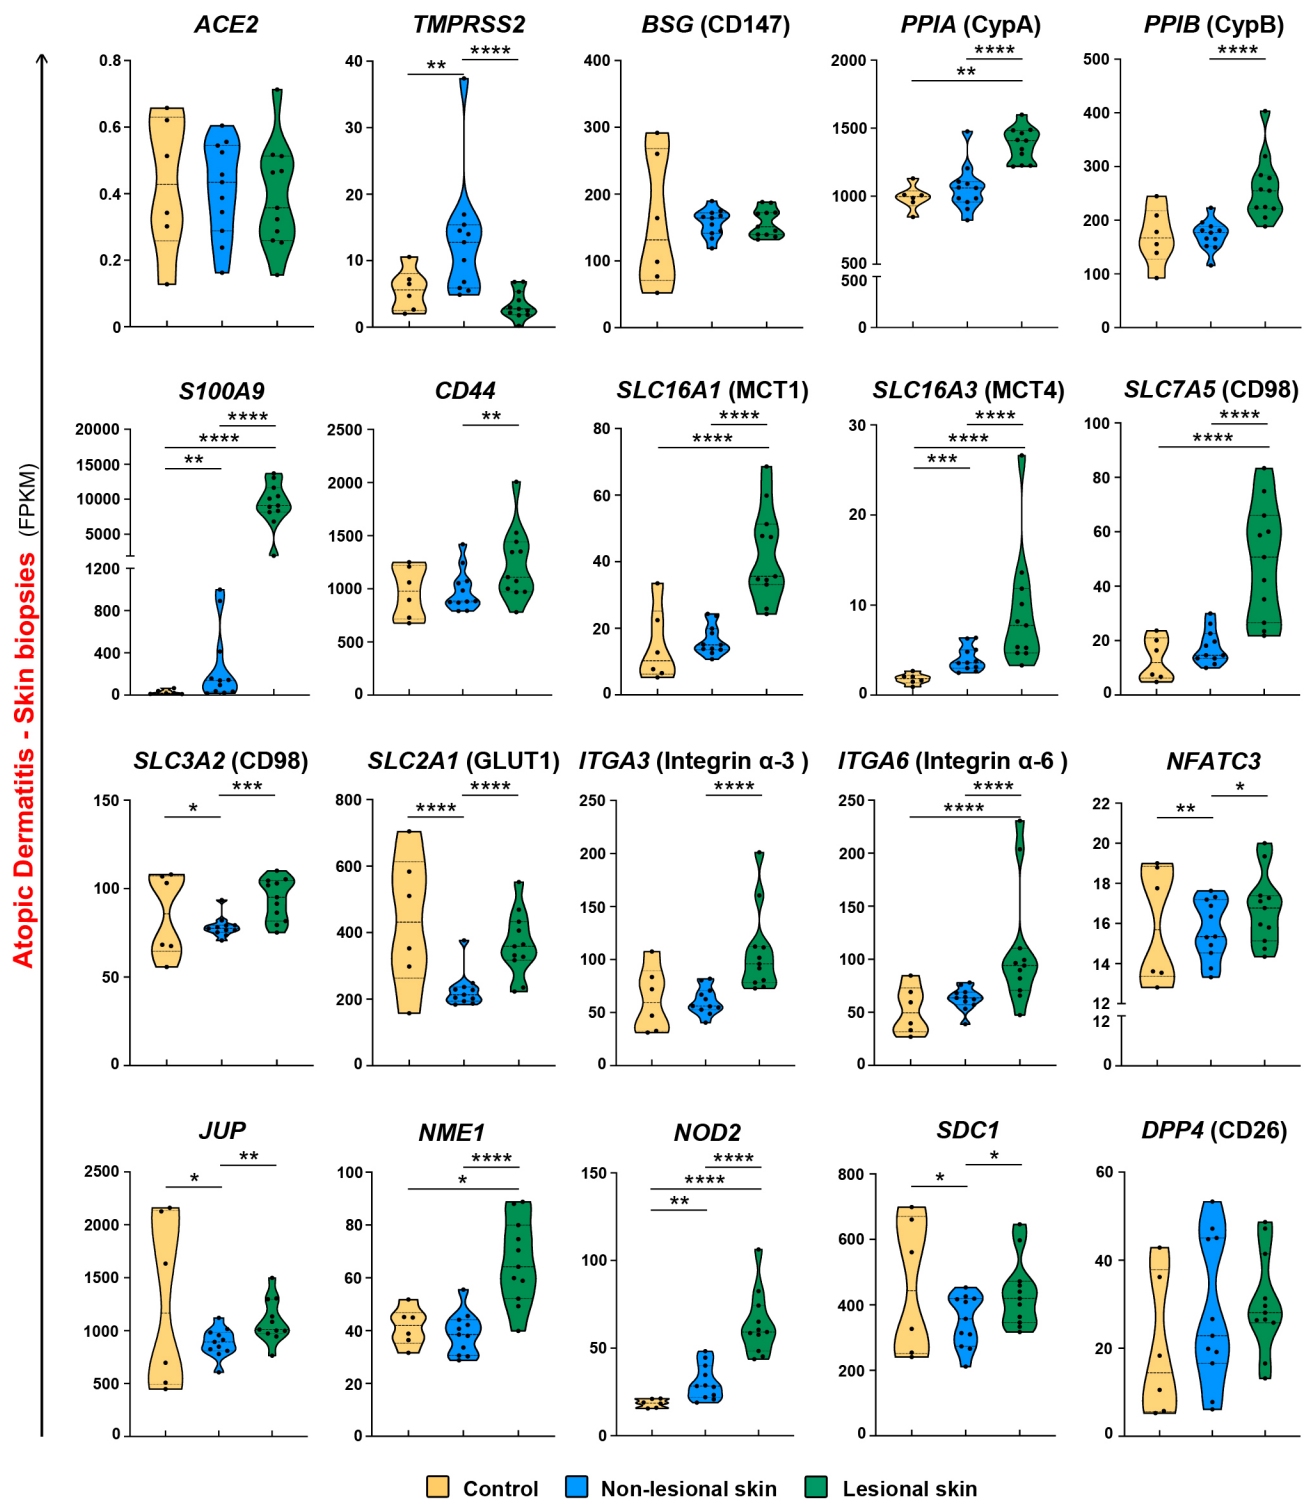

## Figure 6

A

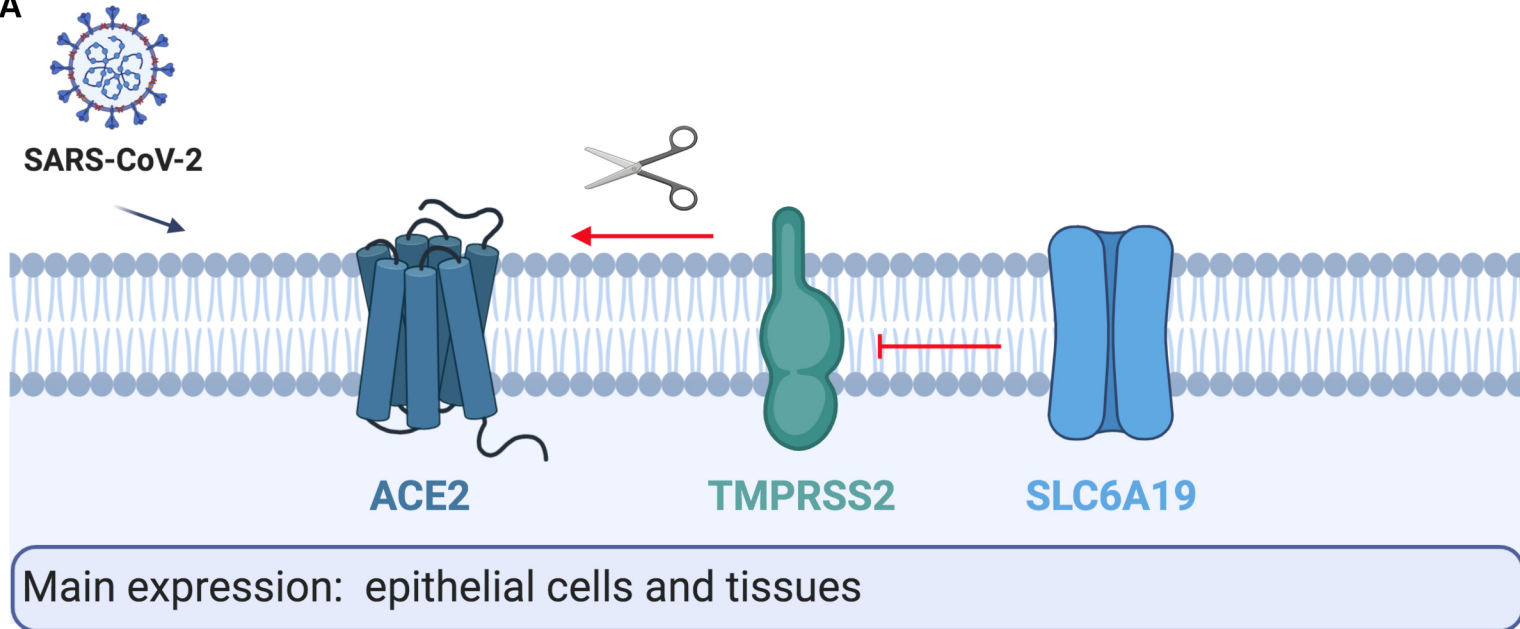

B

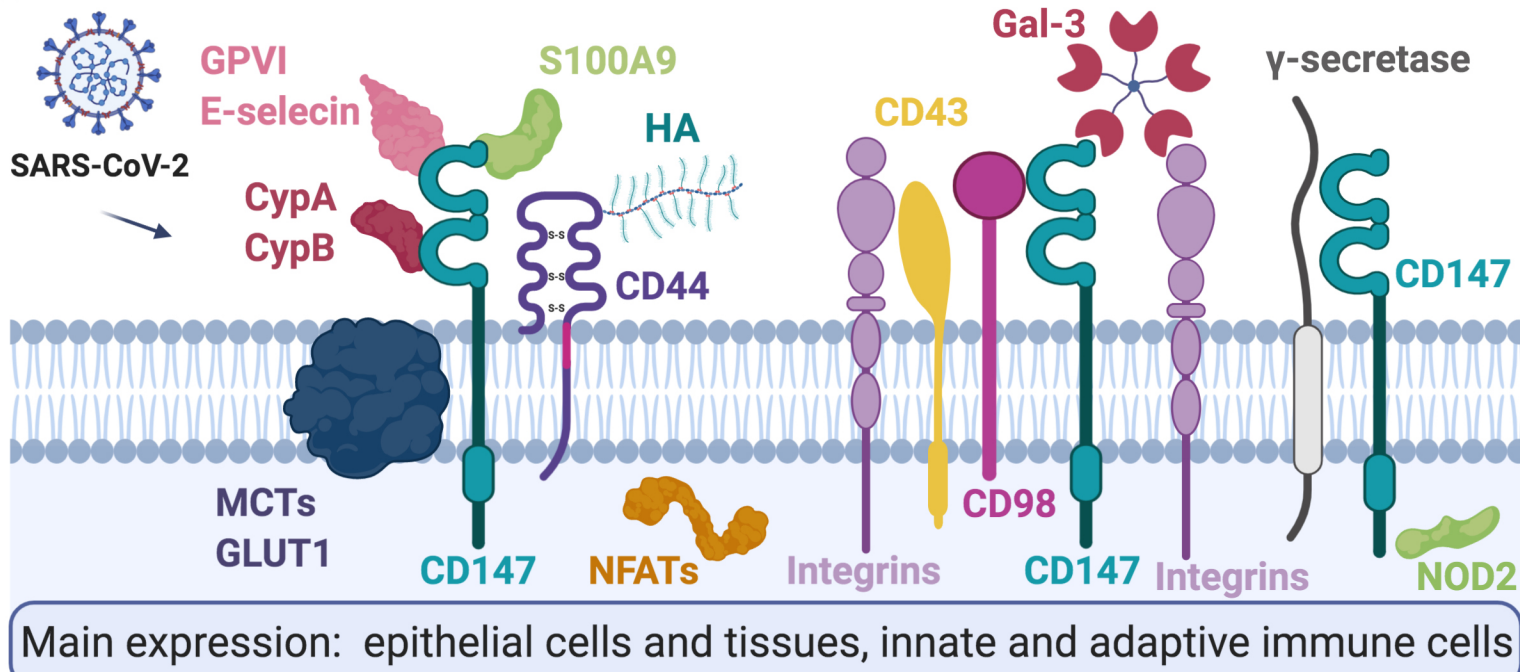

C

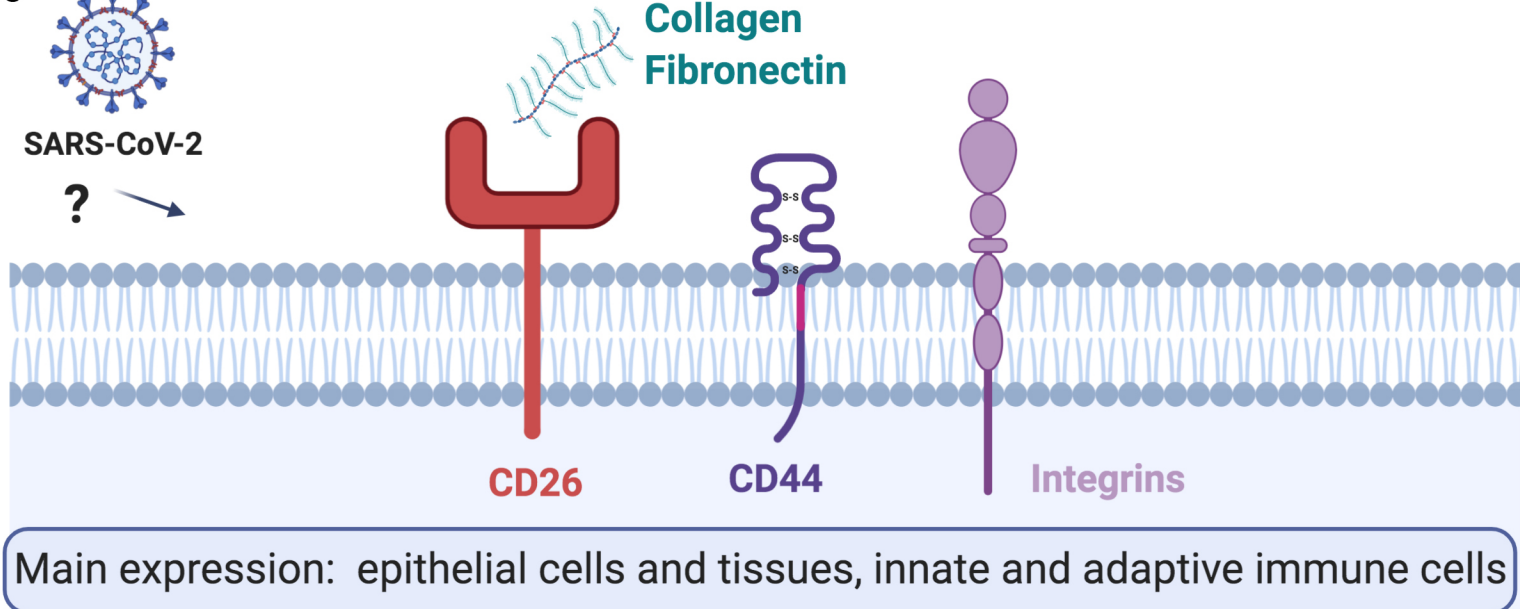

Source: https://www.biorxiv.org/content/biorxiv/early/2020/05/15/2020.05.14.090332.full.pdf
