# Supplementary material for: Distribution of ACE2, CD147, cyclophilins, CD26 and other SARS-CoV-2 associated molecules in human tissues and immune cells in health and disease
Source: bioRxiv or medRxiv preprint supplement (doi:10.1101/2020.05.14.090332), 2020-05-15

## Supplementary Figure Titles and Legends

**Figure S1. Heatmap of ACE-2-, CD147-and CD26-related gene expression in different cells and tissues**

**Figure S2. Gene Co-Expression in Bronchial Biopsy in non-diseased control**

**Figure S3. Gene Co-Expression in Blood in non-diseased control**

**Figure S4. Human Bronchial Epithelial Cells**

**A-E** Gene expression of ACE, SDC1, LGALS3, NFAT5 and NME1 in control, asthma and COPD population

**Figure S5. Bronchial Biopsy**

**A-F** Gene expression of ACE, ACE2, BSG(CD147), CD44, SLC7A5(CD98) and ITGA3 in subgroups including control, asthma, COPD, non-obese, obese, normotension, hypertension, non-smoker, smoker, female and male.

**G-H** Gene expression of ITGA6 and APOD in subgroups including control, asthma, COPD, non-obese, obese, normotension, hypertension, non-smoker, smoker, female and male.

**Figure S6. Gene Co-Expression in Bronchial Biopsy in asthma patients**

**Figure S7. Broncho-Alveolar Lavage**

**A-F** Gene expression of ACE, ACE2, BSG(CD147), PPIA, S100A9 and CD44 in subgroups including control, asthma, COPD, non-obese, obese, normotension, hypertension, non-smoker, smoker, female and male.

**G-L** Gene expression of SLC16A7(MCT2), SLC16A3(MCTs), ITGA3, NFATC1, NFATC2 and SLC7A5(CD98) in subgroups including control, asthma, COPD, non-obese, obese, normotension, hypertension, non-smoker, smoker, female and male.

**M-O** Gene expression of APH1A, PSEN1 and PSENEN in subgroups including control, asthma, COPD, non-obese, obese, normotension, hypertension, non-

smoker, smoker, female and male.

### **Figure S8. Blood**

**A-F** Gene expression of ACE, ACE2, BSG(CD147), PPIA, S100A9 and CD44 in subgroups including control, asthma, COPD, non-obese, obese, normotension, hypertension, non-smoker, smoker, female and male.

**G-L** Gene expression of SLC16A7(MCT2), ITGA6, NFATC2, LGALS3, NOD2 and NME1 in subgroups including control, asthma, COPD, non-obese, obese, normotension, hypertension, non-smoker, smoker, female and male.

**M** Gene expression of DPP4 in subgroups including control, asthma, COPD, non-obese, obese, normotension, hypertension, non-smoker, smoker, female and male.

### **Figure S9. Gene Co-Expression in Broncho-Alveolar Lavage in asthma patients**

### **Figure S10. Gene Co-Expression in Blood in asthma patients**

### **Figure S11. Correlation Analysis**

**A** Correlation analysis between SDC1 and age in broncho-alveolar lavage

**B** Correlation analysis between SLC16A1 and age in blood

**C** Correlation analysis between NME1 and BMI in blood

**D** Correlation analysis between NCSTN and BMI in blood





# Figure S2

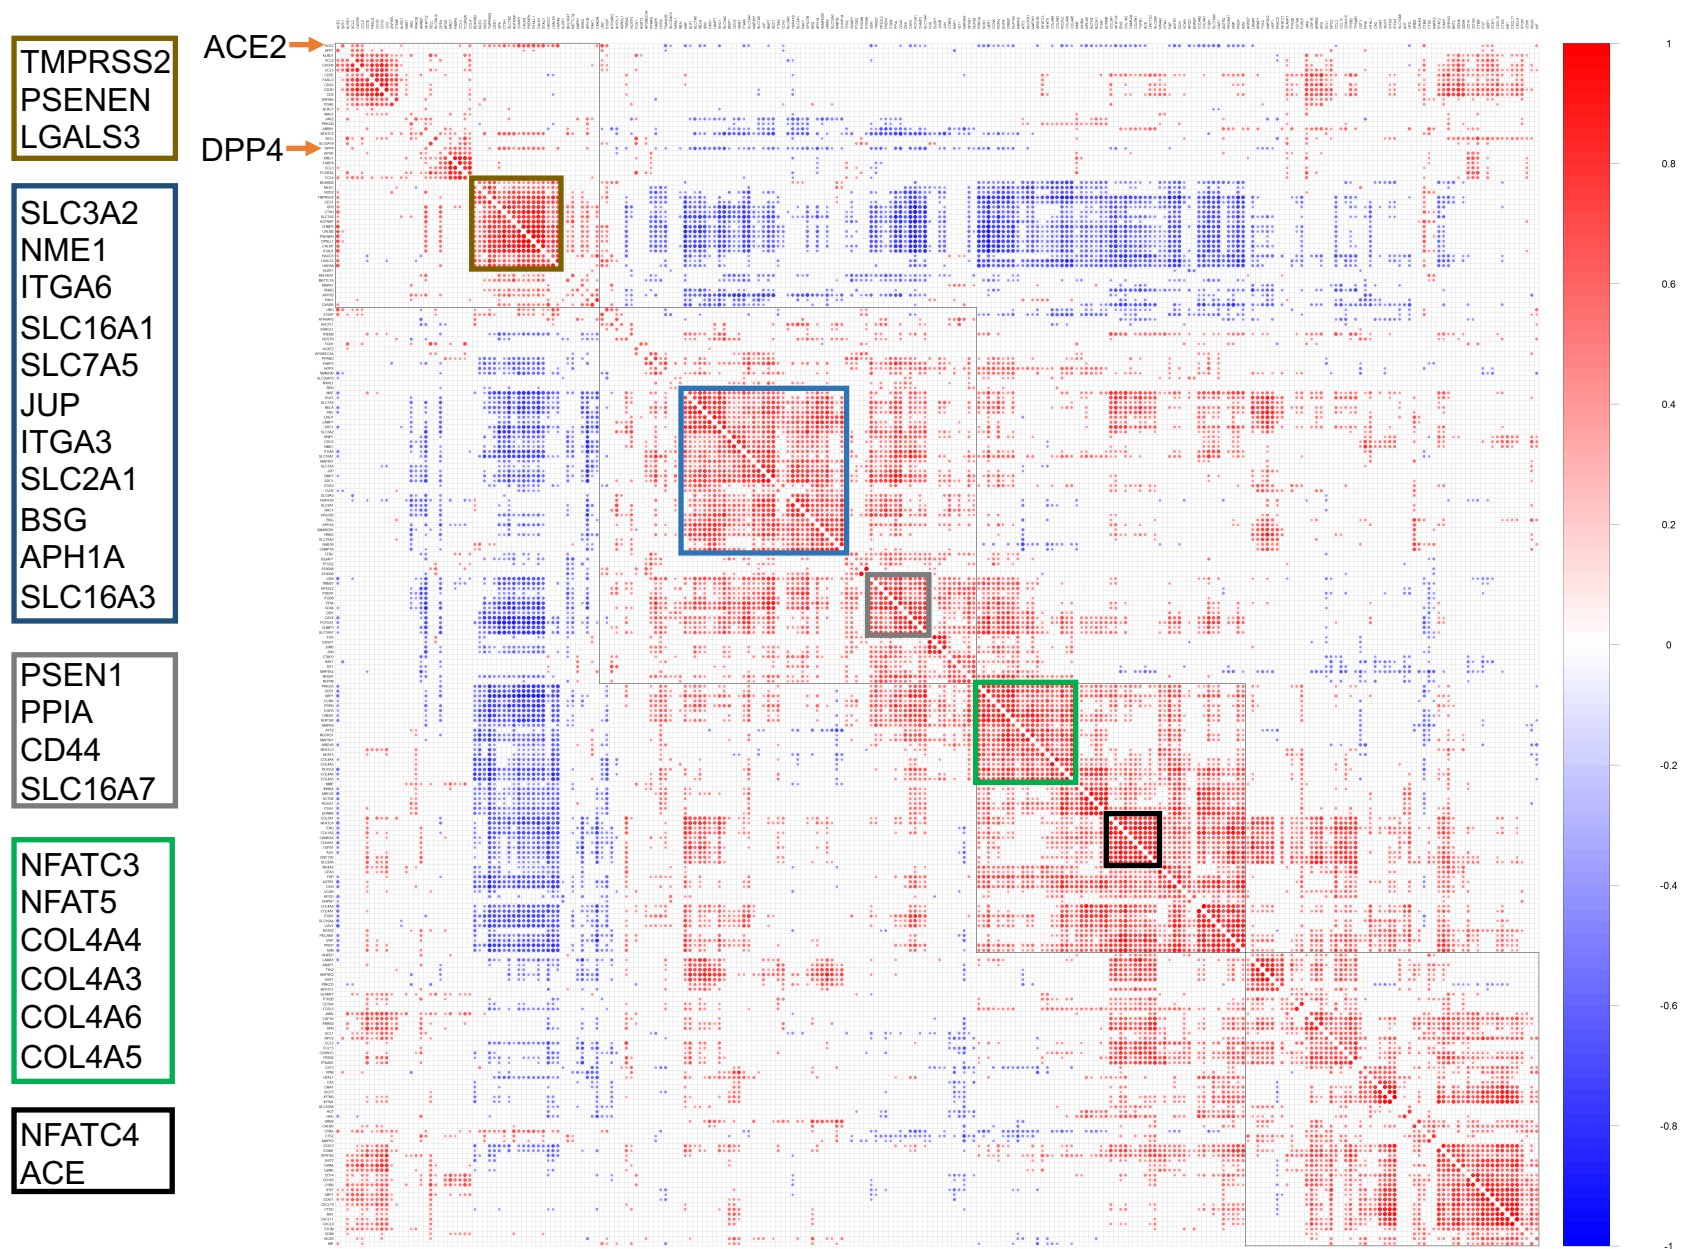

Figure S3

NME1  
PPIA

NFAT5  
SLC16A7  
CD44  
APH1B

DPP4 →

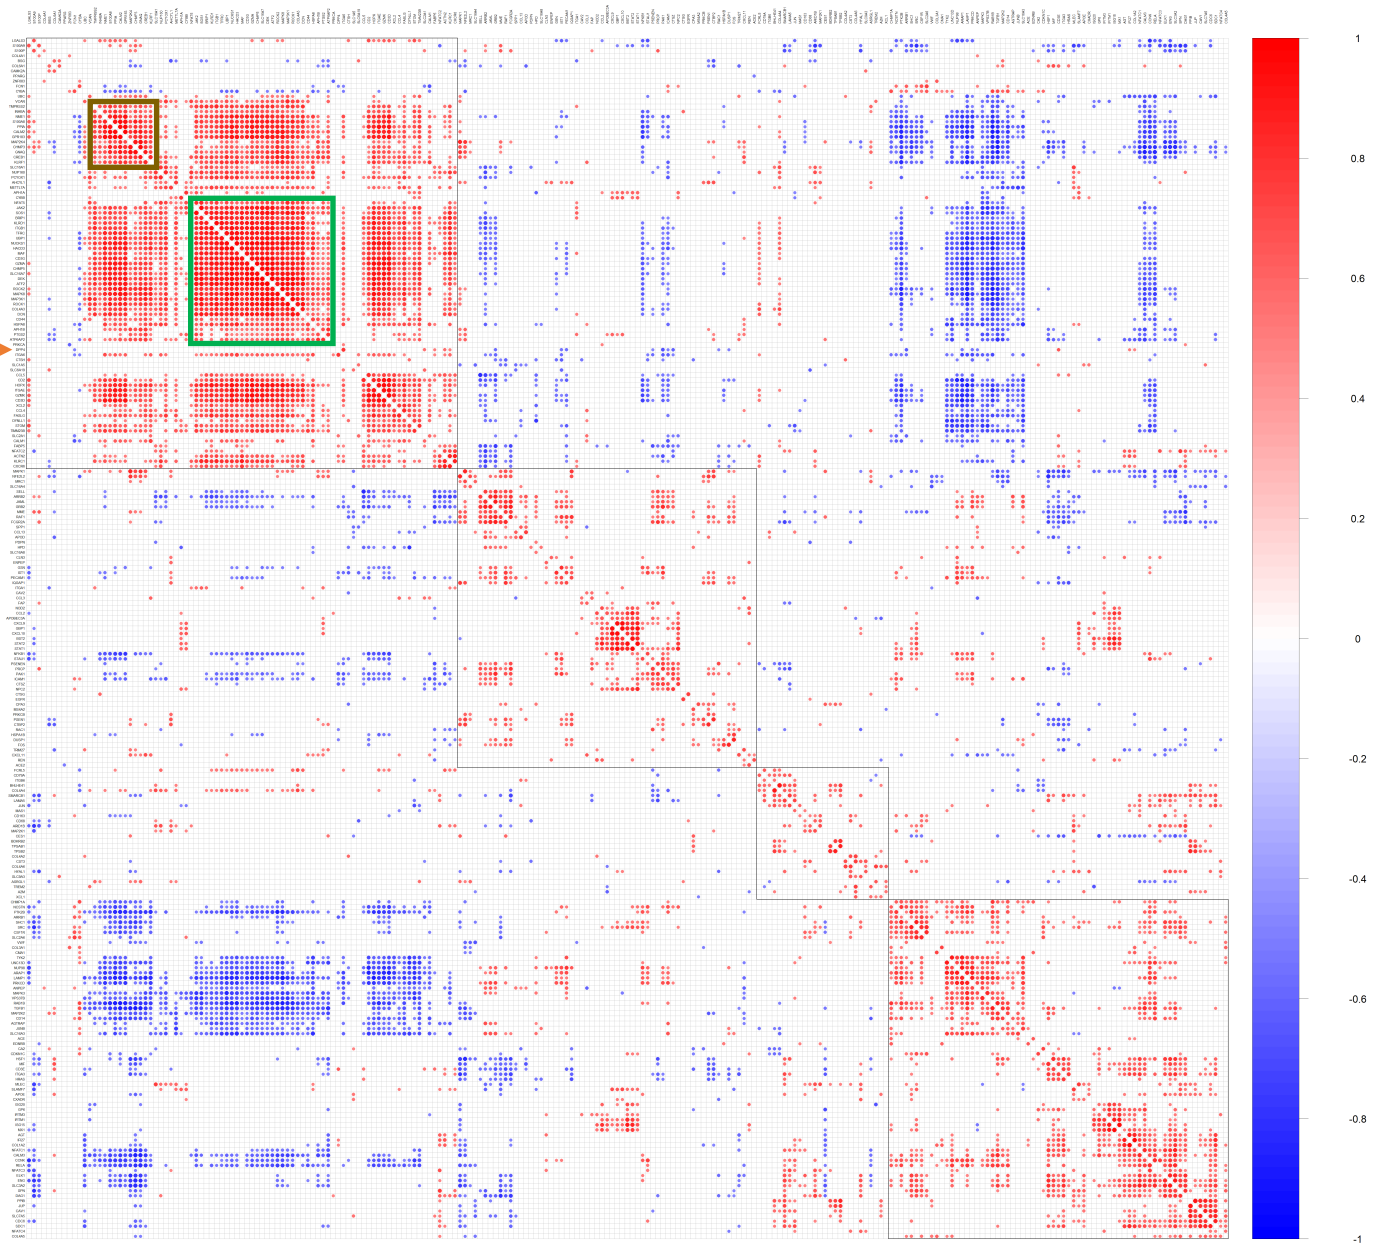

**Figure S4**

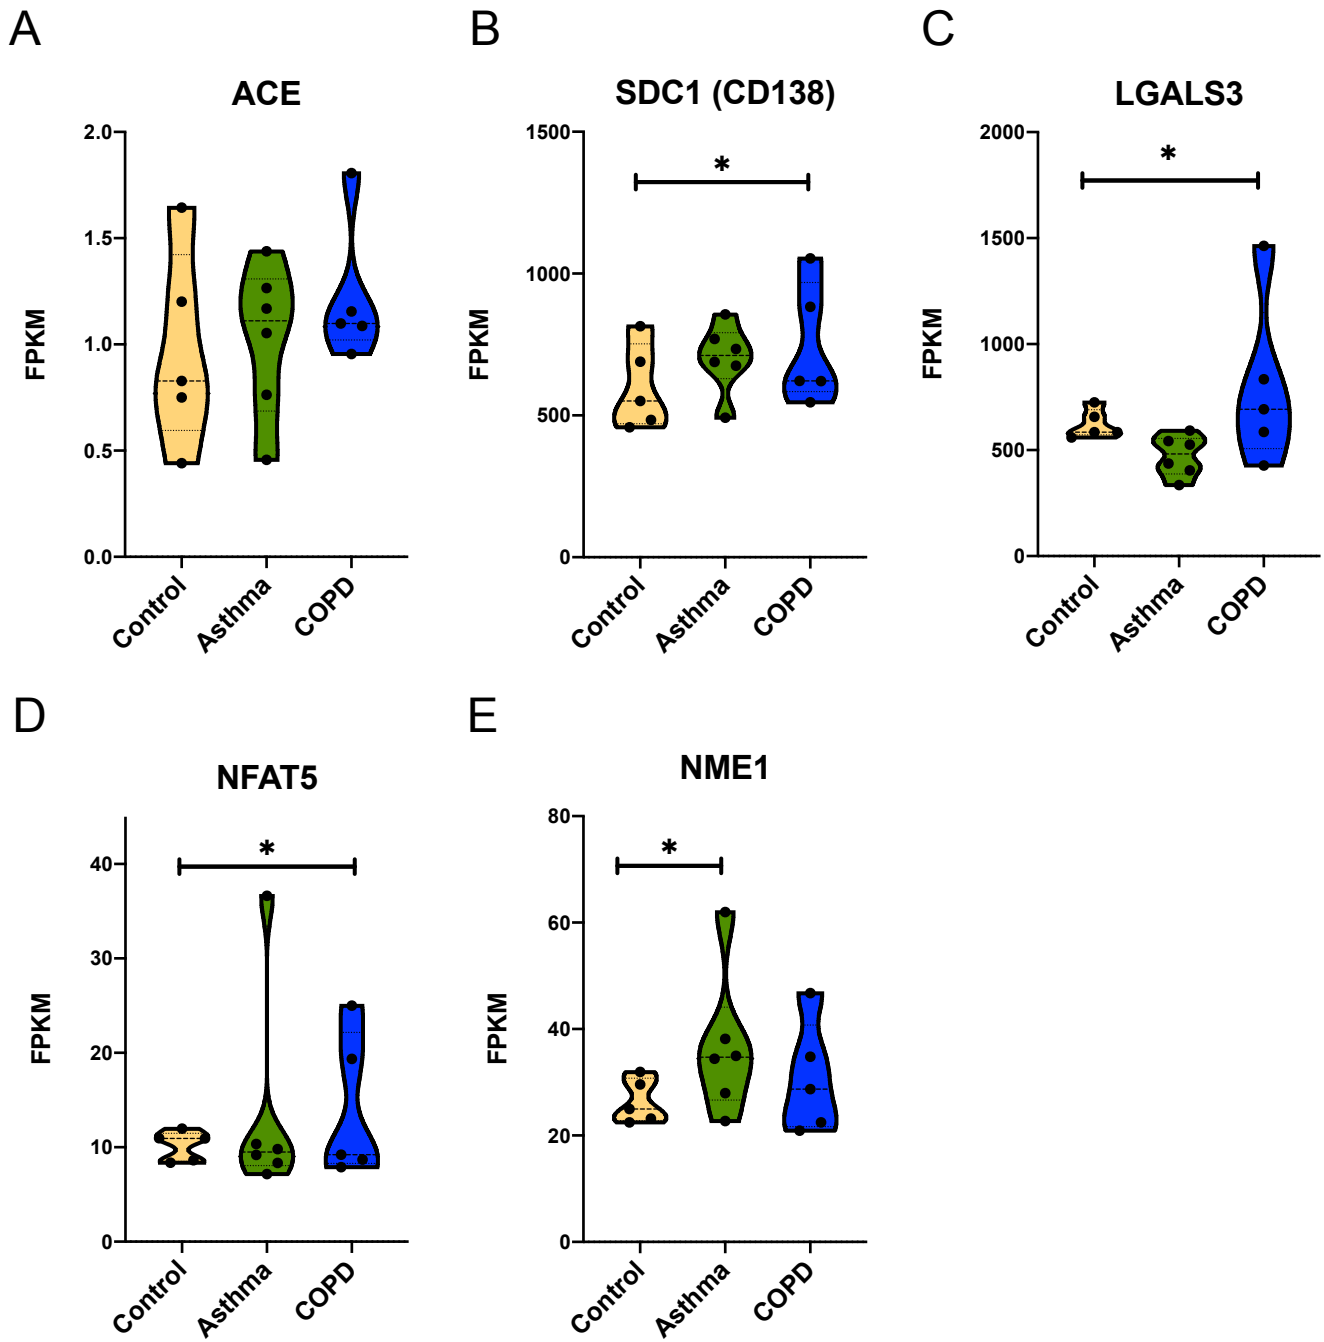



Figure S5

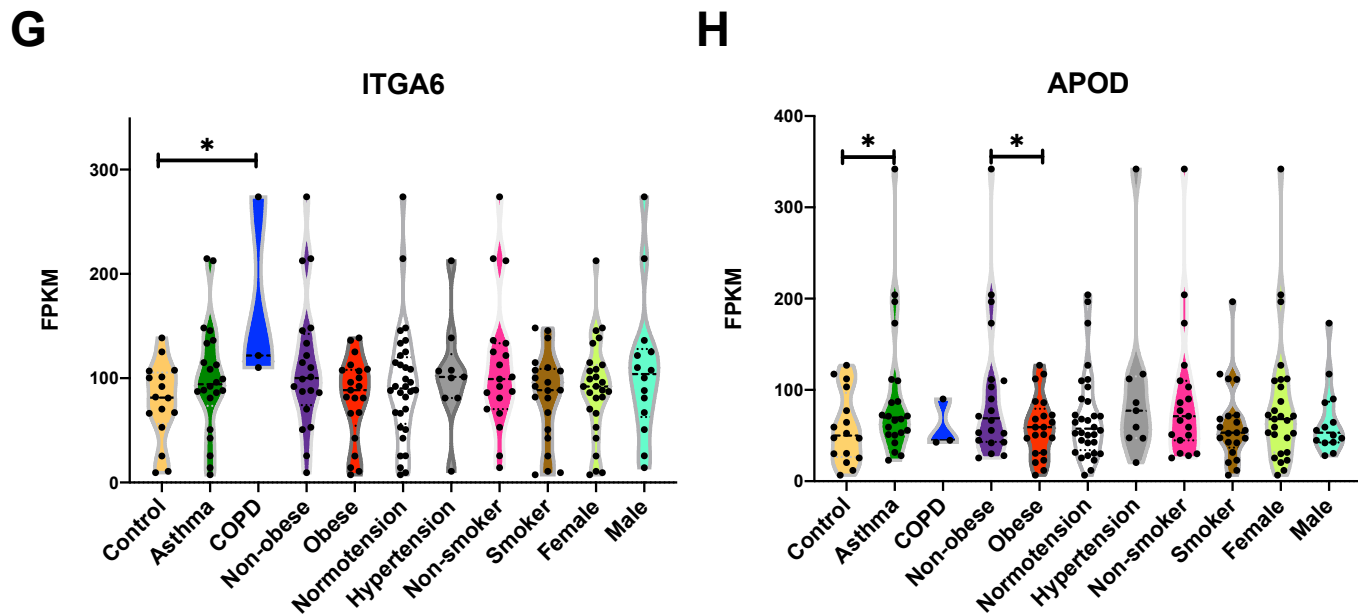



Figure S6

LGALS3  
PSENNEN  
TMPRSS2

NFATC1  
NFATC4

NCSTN  
SLC16A3

SLC16A1  
CD44

SLC3A2  
PPIA

SDC1  
APH1A

ITGA3  
JUP

NFAT5  
EGFR

NME1  
PPIB  
ACE2

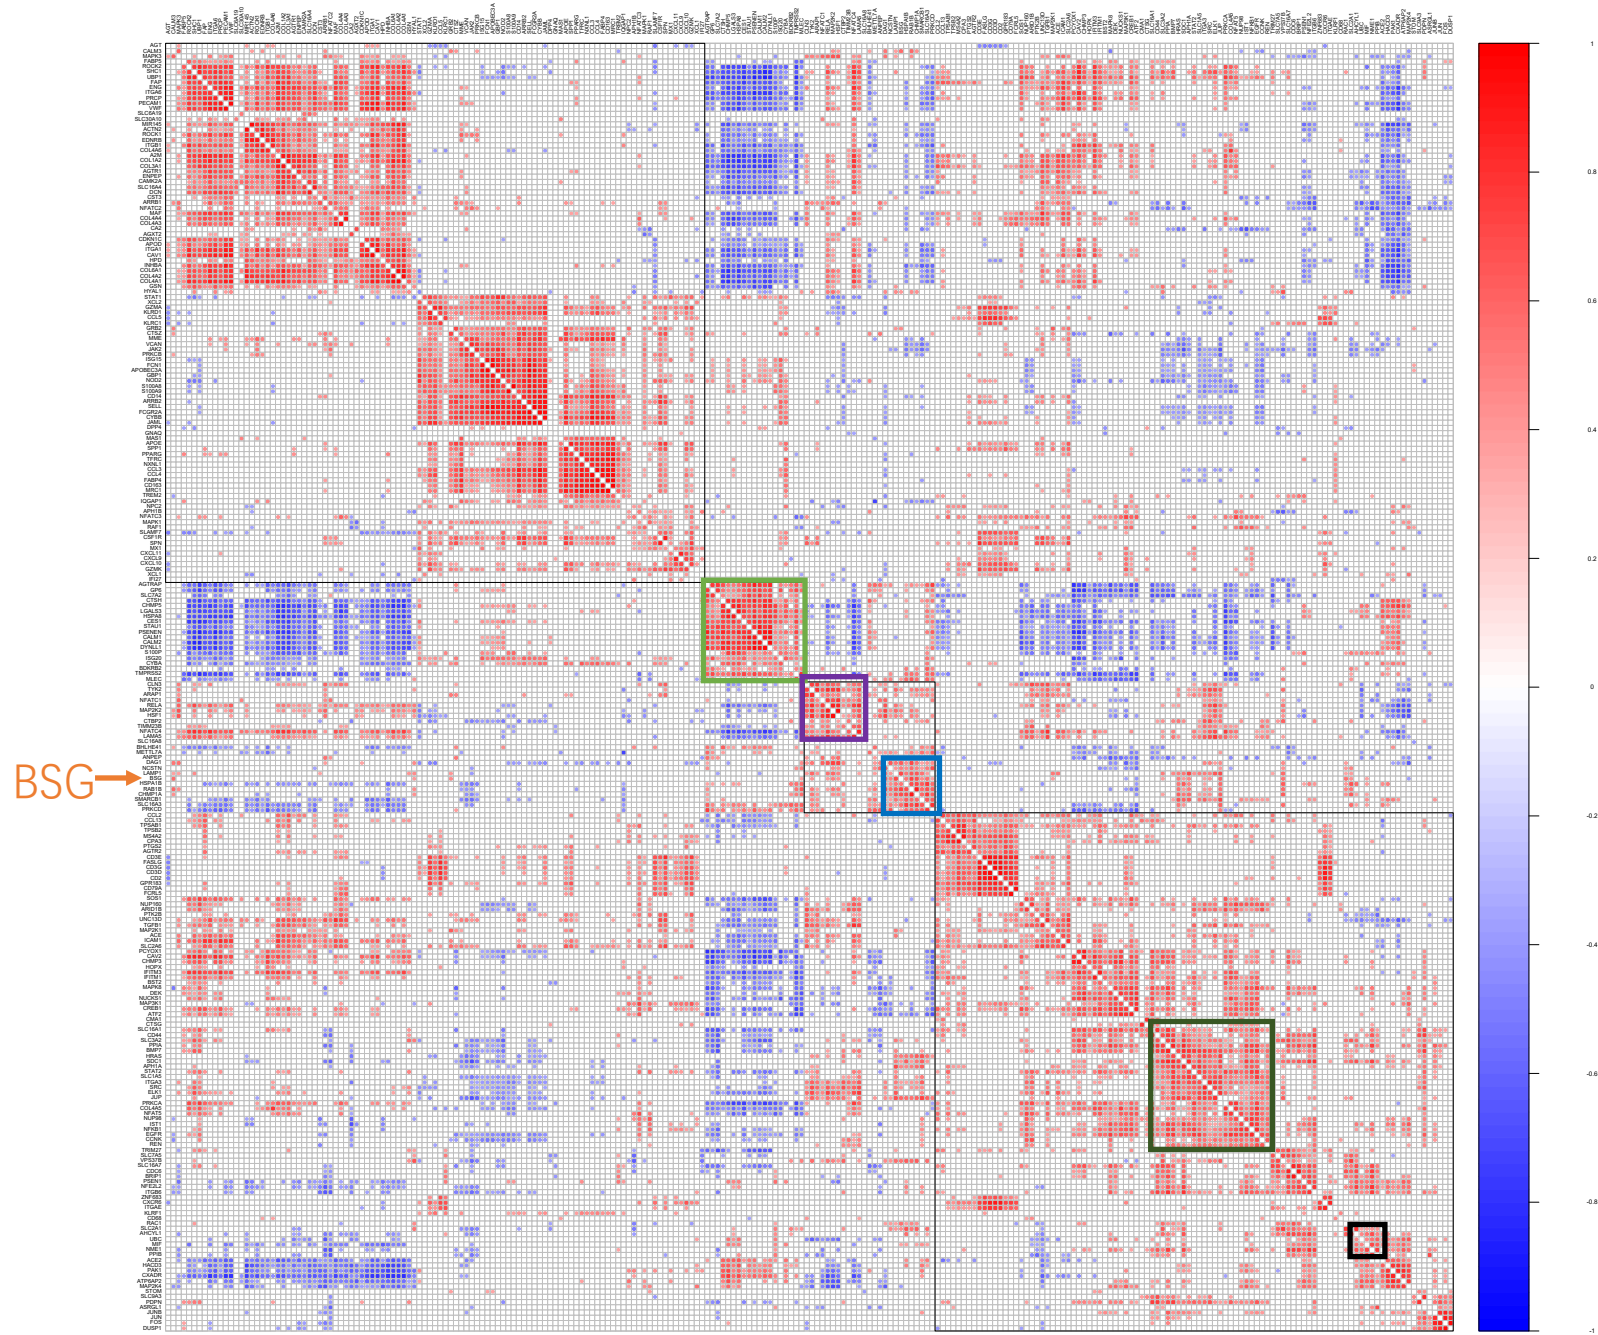





Figure S7

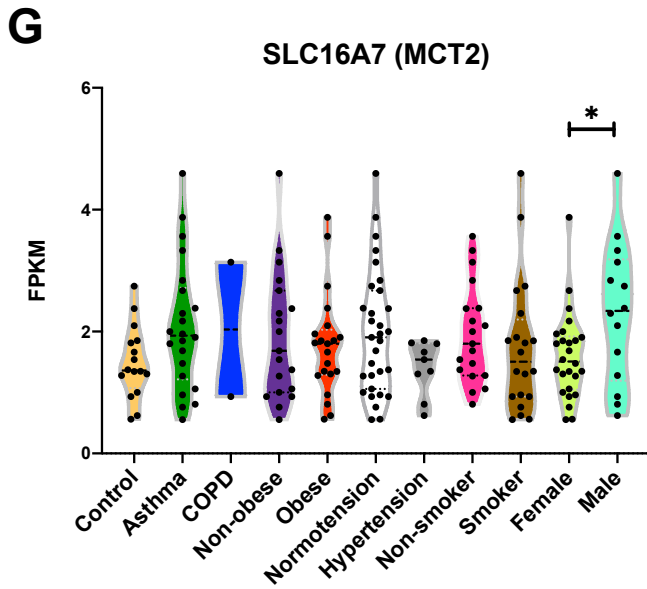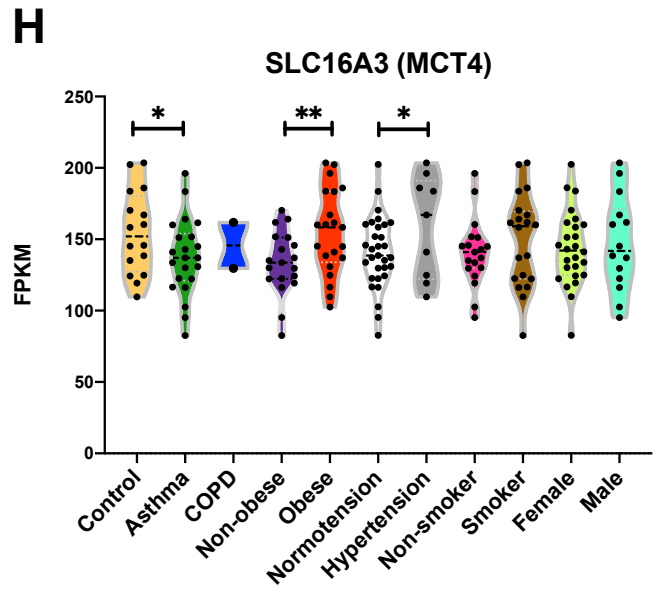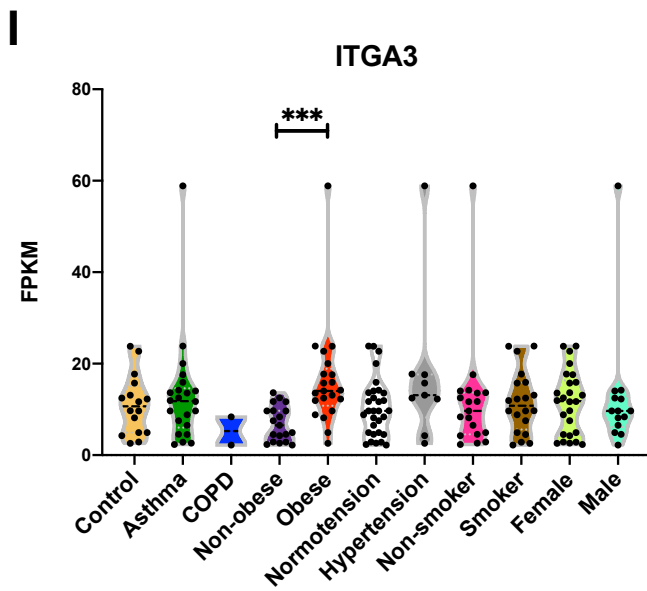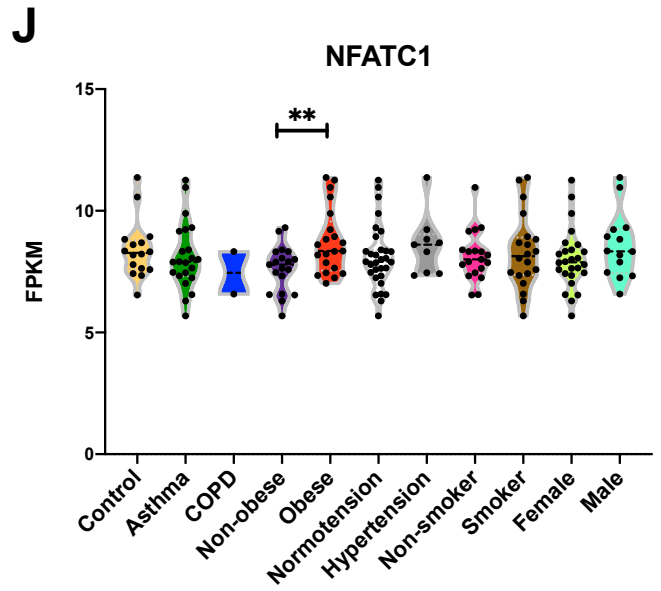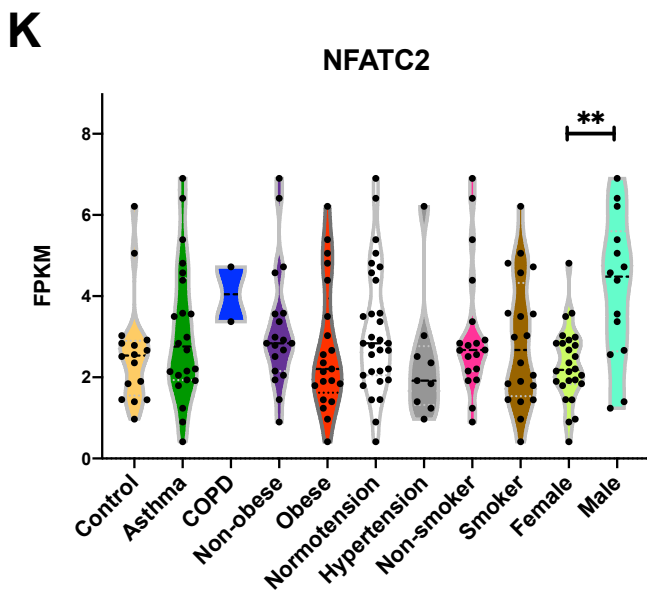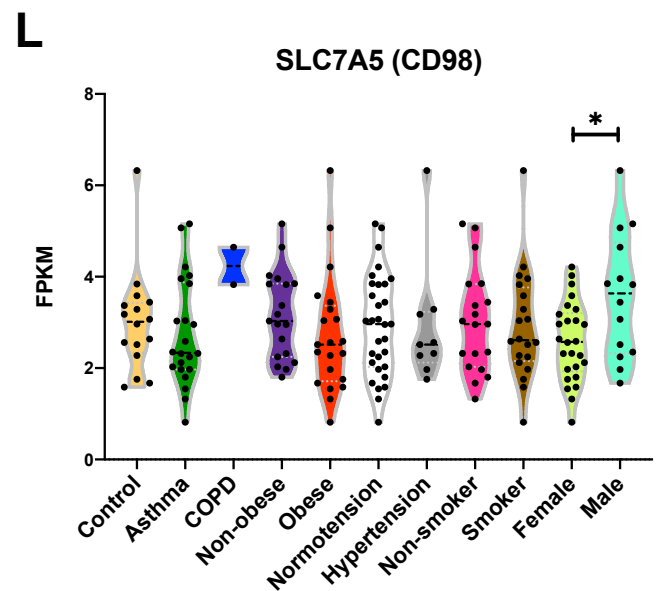

Figure S7

M

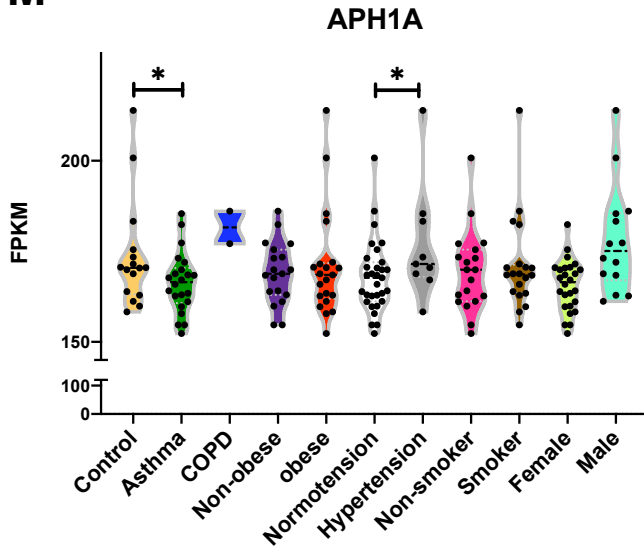

N

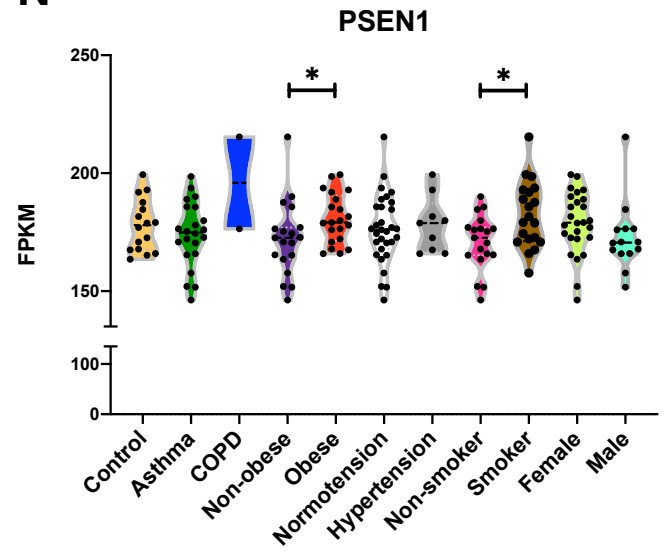

O

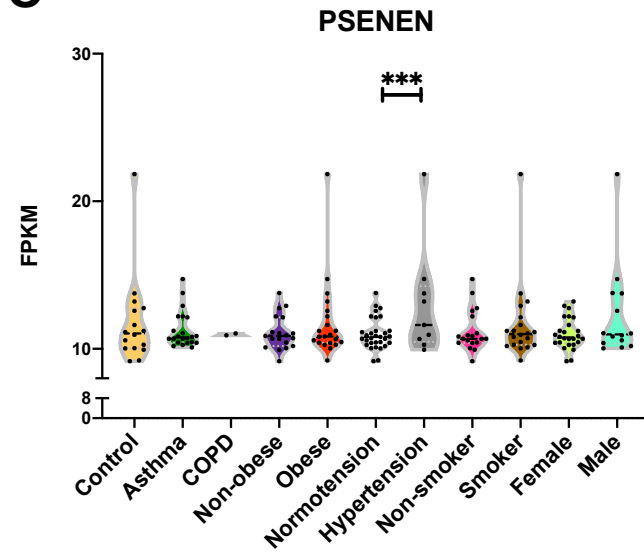

Figure S8

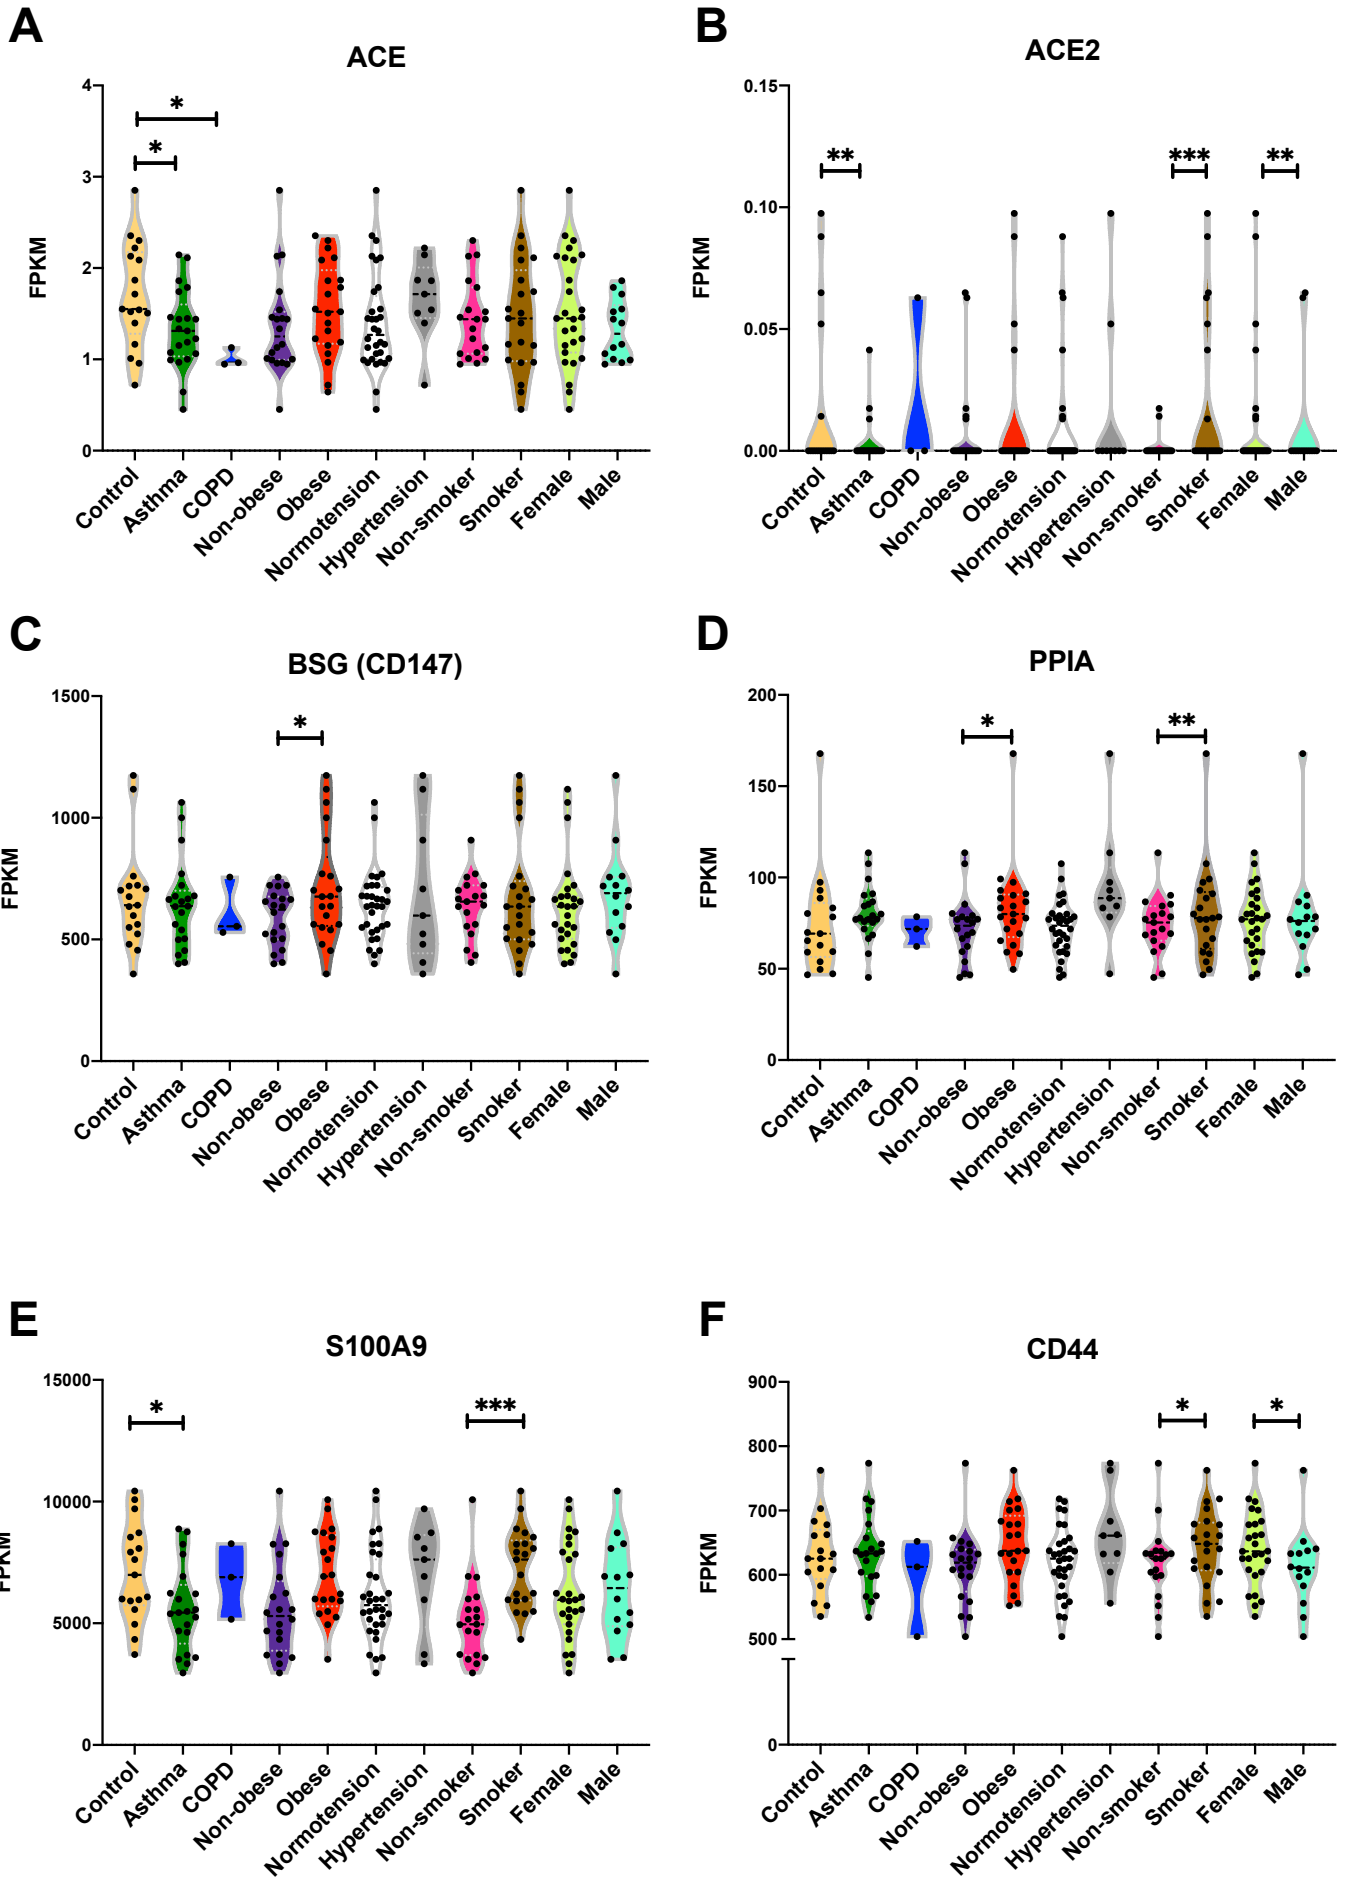

Figure S8

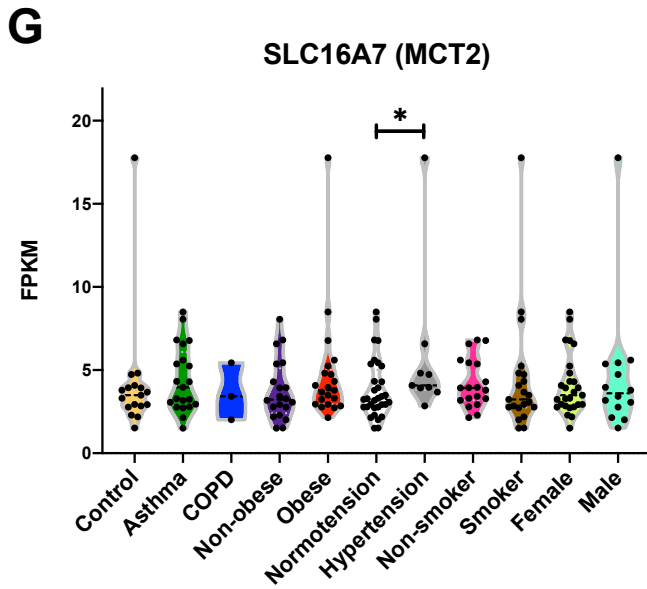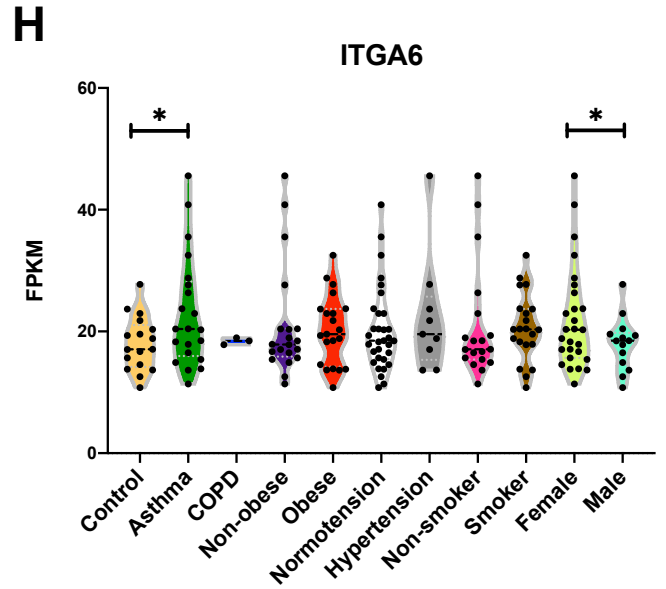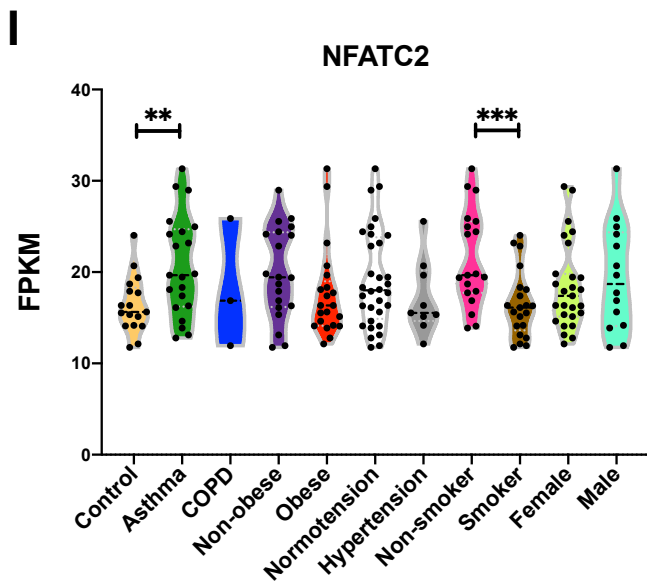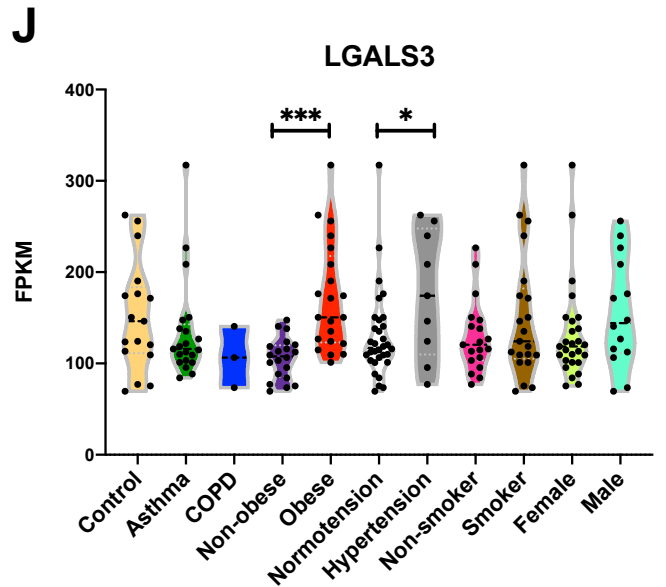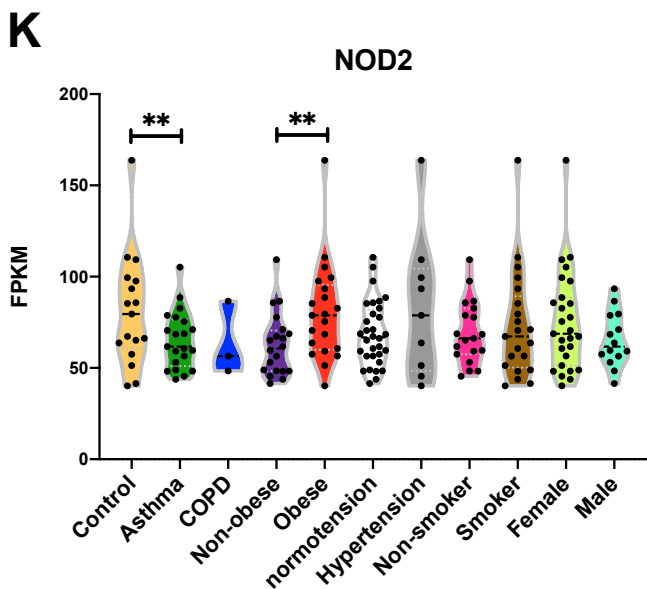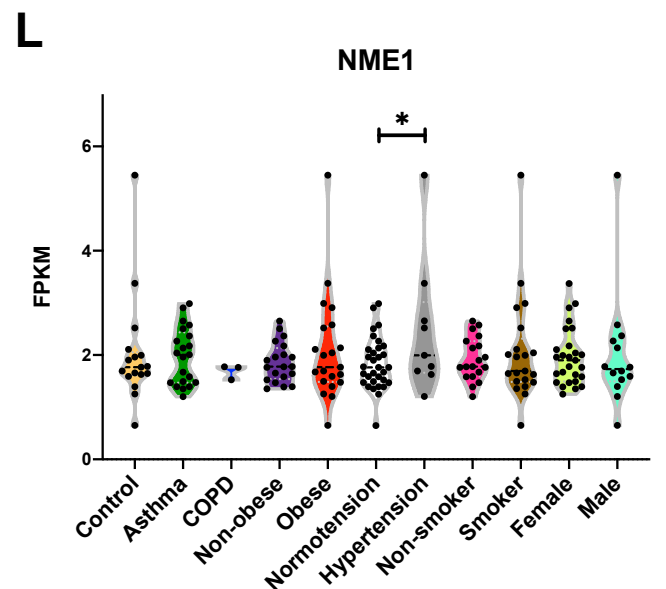

Figure S8

M

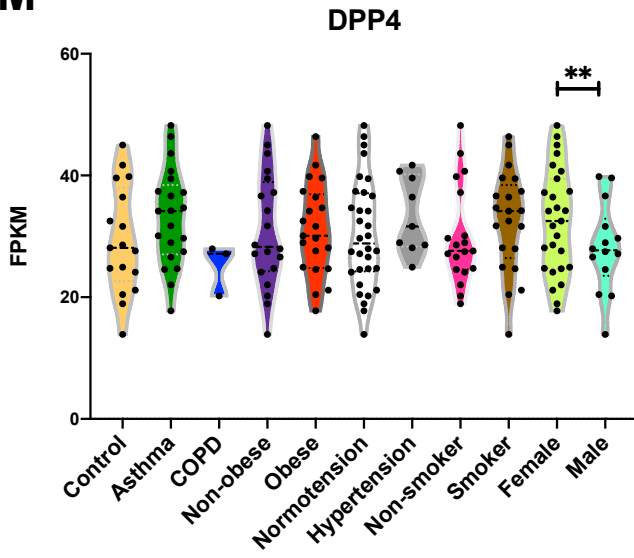

Figure S9

SLC7A5  
NFATC2

PPIB  
SLC2A1  
APH1A

S100A9  
CD44

APOD  
TMPRSS2  
ITGB6  
NFATC4

ITGB1  
SPN

SLC16A7  
DPP4

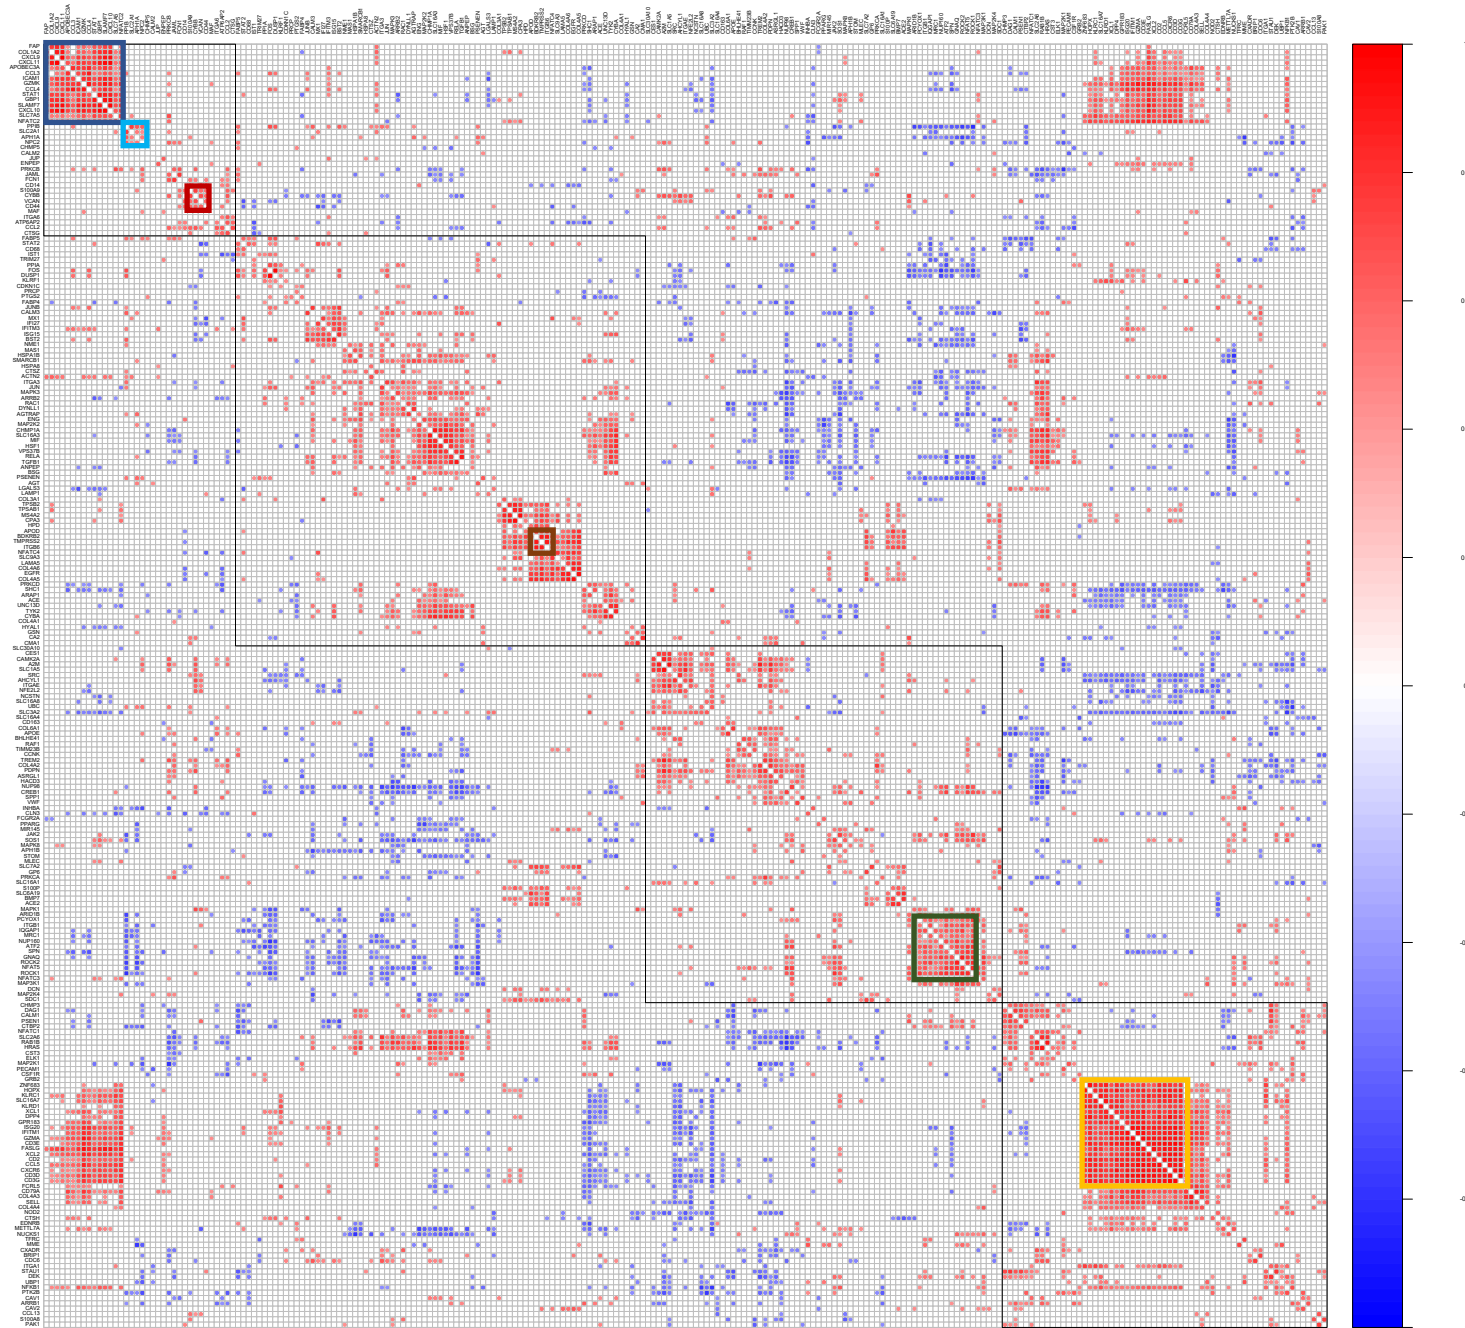



Figure S10

SLC2A1  
SPN  
ITGA3  
NFATC1  
SLC3A2

PPIA  
NME1

NFATC3  
NFATC2

BSG  
SLC7A5

ITGA1  
APH1A

S100A9  
PSEN1  
APH1B

TMPRSS2  
SLC16A7  
NFAT5

CD44  
DPP4  
ITGA6

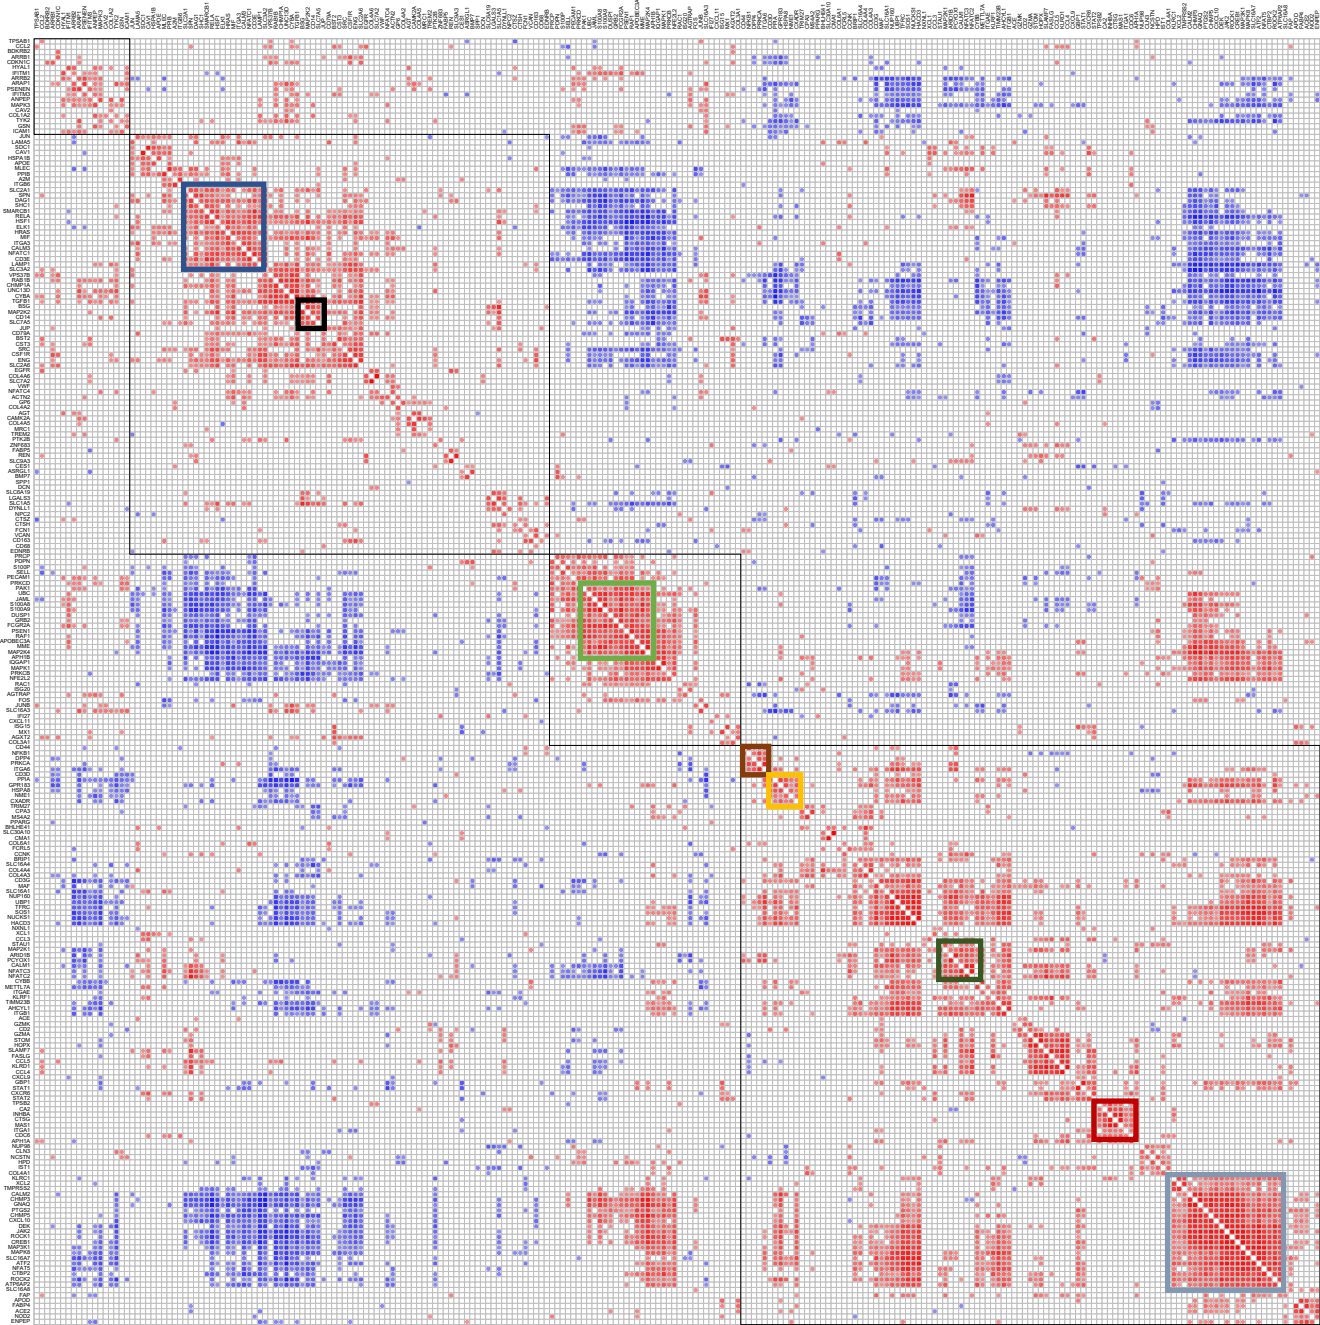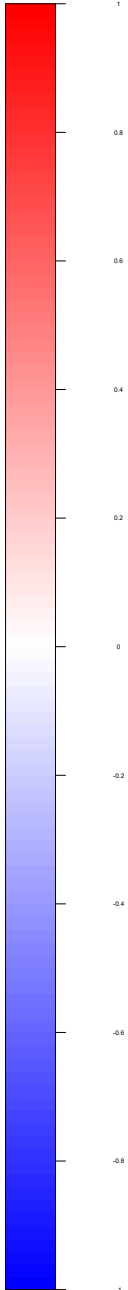

**Figure S11**

**A**

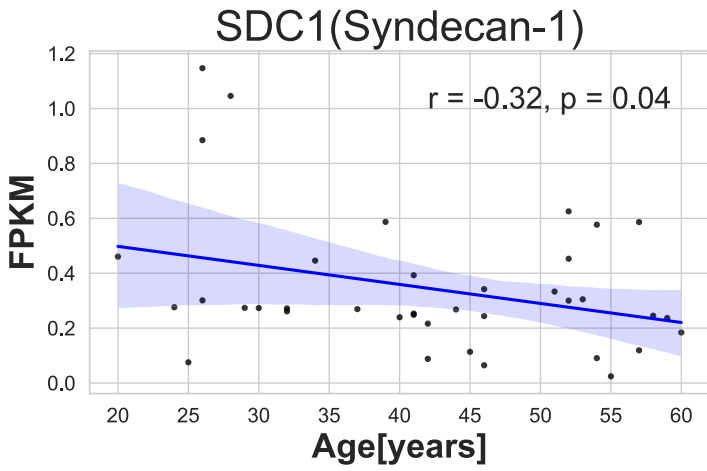

**B**

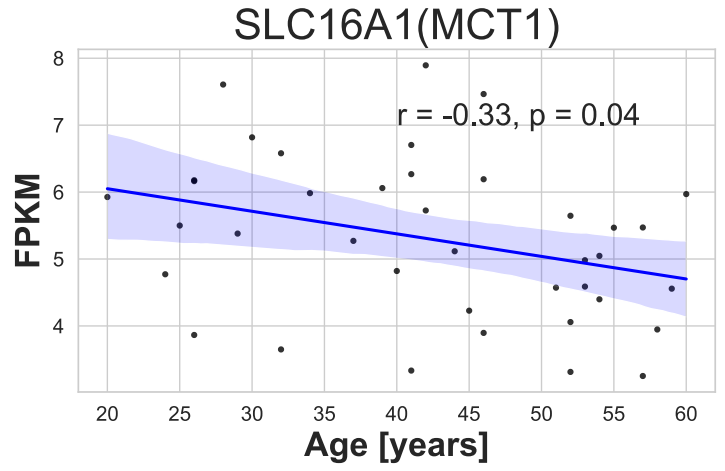

**C**

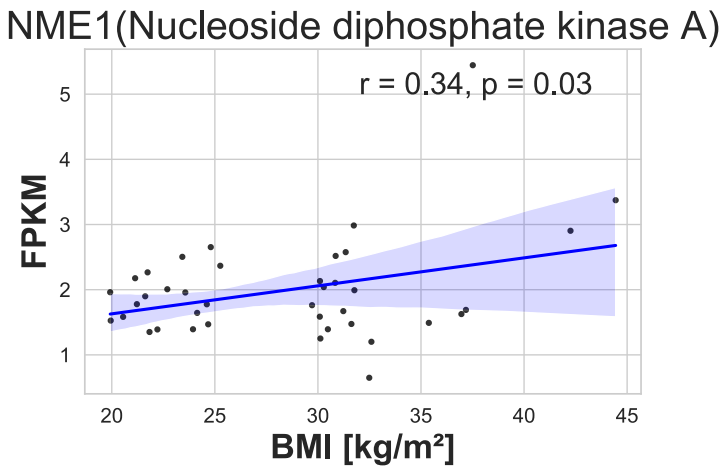

**D**

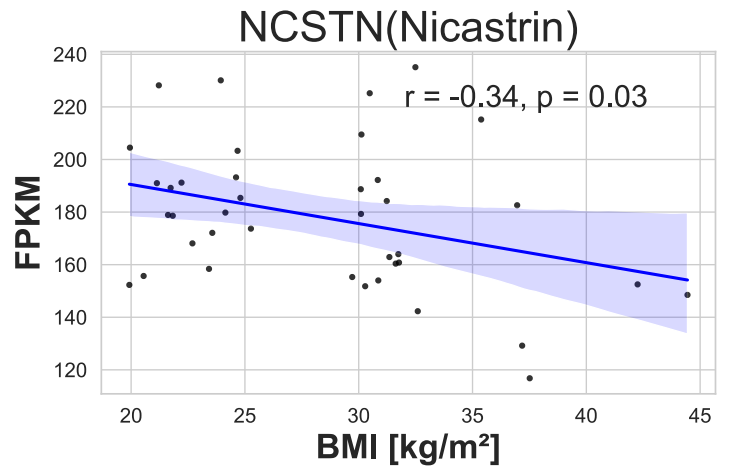

Supplement: Supplementary file [file media-1.pdf]
