# Supplementary material for: Distribution of ACE2, CD147, cyclophilins, CD26 and other SARS-CoV-2 associated molecules in human tissues and immune cells in health and disease
Source: bioRxiv or medRxiv preprint supplement (doi:10.1101/2020.05.14.090332), 2020-05-15
Supplement: Supplementary file [file media-2.pdf]

1 **Distribution of ACE2, CD147, cyclophilins, CD26 and other SARS-CoV-2 associated molecules in**  
2 **human tissues and immune cells in health and disease**

3 **Short title:** SARS-CoV-2 associated molecules in health and disease

4 Radzikowska U.<sup>1,2,3\*</sup>, Ding M.<sup>1,2,4\*</sup>, Tan G.<sup>1,5</sup>, Zhakparov D.<sup>1</sup>, Peng Y.<sup>1,2,6</sup>, Wawrzyniak P.<sup>1,2,7</sup>, Wang  
5 M.<sup>1,2,8</sup>, Li S.<sup>1,9</sup>, Morita H.<sup>1,10</sup>, Altunbulakli C.<sup>1,2</sup>, Reiger M.<sup>11</sup>, Neumann AU.<sup>11,12,13</sup>, Lunjani N.<sup>1,2</sup>, Traidl-  
6 Hoffmann C.<sup>2,11</sup>, Nadeau K.<sup>14</sup>, O'Mahony L.<sup>1,15</sup>, Akdis CA.<sup>1,2</sup>, Sokolowska M.<sup>1,2#</sup>

7  
8 **\*equal contribution**

9 **Affiliations**

10 <sup>1</sup> Swiss Institute of Allergy and Asthma Research (SIAF), University of Zurich, Davos, Switzerland

11 <sup>2</sup> Christine Kühne – Center for Research and Education (CK-CARE), Davos, Switzerland

12 <sup>3</sup> Department of Regenerative Medicine and Immune Regulation, Medical University of Bialystok,  
13 Bialystok, Poland

14 <sup>4</sup> Department of Allergology, Zhongnan Hospital of Wuhan University, Wuhan, China

15 <sup>5</sup> Functional Genomic Centre Zurich, ETH Zurich/University of Zurich, Zurich, Switzerland

16 <sup>6</sup> Otorhinolaryngology Hospital, The First Affiliated Hospital, Sun Yat-sen University, Guangzhou,  
17 China

18 <sup>7</sup> Division of Clinical Chemistry and Biochemistry, University Children`s Hospital Zurich, Zurich,  
19 Switzerland; Children`s Research Center, University Children`s Hospital Zurich, Zurich, Switzerland

20 <sup>8</sup> Department of Otolaryngology, Head and Neck Surgery, Beijing TongRen Hospital, Capital Medical  
21 University and the Beijing Key Laboratory of Nasal Diseases, Beijing Institute of Otolaryngology,  
22 Beijing, China

23 <sup>9</sup> Department of Cancer Immunology, Institute for Cancer Research, Oslo University Hospital, Oslo,  
24 Norway

25 <sup>10</sup> Department of Allergy and Clinical Immunology, National Research Institute for Child Health and  
26 Development, Tokyo, Japan

27 <sup>11</sup> Chair and Institute of Environmental Medicine, UNIKA-T, Technical University of Munich and  
28 Helmholtz Zentrum Munchen, Augsburg, Germany

29 <sup>12</sup> Institute of Computational Biology (ICB), Helmholtz Zentrum Munchen, Munich, Germany  
30 <sup>13</sup> Institute of Experimental Medicine (IEM), Czech Academy of Sciences, Prague, Czech Republic  
31 <sup>14</sup> Sean N Parker Centre for Allergy and Asthma Research at Stanford University, Department of  
32 Medicine, Stanford University School of Medicine, Stanford, USA  
33 <sup>15</sup> Department of Medicine and School of Microbiology, APC Microbiome Ireland, National University  
34 of Ireland, Cork, Ireland

35 **# corresponding author:**

36  
37 Milena Sokolowska MD, PhD  
38 Head Immune Metabolism  
39 Swiss Institute of Allergy and Asthma Research (SIAF)  
40 University of Zurich  
41 Herman-Burchard-Strasse 9  
42 CH-7265 Davos-Wolfgang  
43 Tel: +41 (0) 81 410 08 44  
44 Email: [milena.sokolowska@siaf.uzh.ch](mailto:milena.sokolowska@siaf.uzh.ch)  
45 [https://www.siaf.uzh.ch/immune\\_metabolism.html](https://www.siaf.uzh.ch/immune_metabolism.html)

46

47

48 **Online Supplementary**

49

50 **Material and Methods**

51

52 We analyzed gene expression of SARS-CoV-2 receptors and related molecules' (Table S1) in a broad  
53 range of tissues and immune cells from the human RNA-seq databases generated by our *ex vivo* and  
54 *in vitro* approaches in the Swiss Institute of Asthma and Allergy Research (SIAF), by our collaborators  
55 or from the Gene Expression Omnibus (<http://www.ncbi.nlm.nih.gov/>). Detailed description of  
56 projects is presented below:

57

58 **SIAF Study 1**

59 Differentiated primary human bronchial epithelial cells (HBEc) from controls, asthmatics, and COPD  
60 patients were processed as described in the original paper [1]. Briefly, total RNA was extracted and  
61 purified. Sequencing was done on the Illumina HiSeq 4000.

62

63 **SIAF Study 2**

64 Total RNA from differentiated human bronchial epithelial cells (HBECs) from controls was extracted  
65 and purified with a RNeasy Plus Micro Kit (Qiagen, Hilden, Germany). Samples with an RNA integrity  
66 number of greater than 9.0 were chosen for sequencing. Library preparation for RNA-seq was  
67 performed with the TruSeq Stranded mRNA Sample Prep Kit (Illumina, San Diego, Calif). Sequencing  
68 was performed on the Illumina HiSeq 4000.

69  
70 **SIAF Study 3 (GSE112591)**

71 ILC1, ILC2 and ILC3 cell subpopulations from control individuals were obtained through a “2-round  
72 sorting” procedure, and processed as described in the original paper [2]. Briefly, 18 samples were  
73 analyzed using RNA sequencing on Illumina HiSeq 2500 platform.

74  
75 **SIAF Study 4**

76 Skin tissue biopsies were collected from control individuals and atopic dermatitis patients (lesional  
77 and non-lesional sites in the upper arm/lower back area) as described in the original paper [3]. Briefly,  
78 RNA from obtained samples was extracted and purified and then sequenced (RNA-seq) on Illumina  
79 HiSeq 2500.

80  
81 **SIAF Study 5 (GSE110551)**

82 Whole blood samples collected from healthy controls, asthma and COPD patients were stored at -  
83 80°C. BAL and bronchial biopsy samples from the same set of participants were harvested and frozen  
84 in RNALater solution. Next, samples were processed as described in the original paper [4]. Briefly,  
85 RNeasy Mini Kit was used to extract total RNA. Illumina HiSeq 2000 platform was used for sequencing  
86 of barcoded libraries with 51 bp paired-end reads for coverage of 50 million paired reads per sample.

87  
88 **SIAF Study 6**

89 PBMCs were isolated from healthy infants (12-36 months of age) recruited from the AmaXhosa  
90 population in South Africa. RNA was isolated using RNeasy Plus Mini kit (Qiagen). Library was  
91 prepared with Illumina's TruSeq RNA stranded kit with polyA enrichment. RNA-Seq analysis was  
92 performed using HiSeq 4000.

93  
94 **Study 7 (GSE107011)**

95 Immune cells were sorted and processed as described in the original paper [5]. Briefly, RNA aliquots  
96 were isolated. The cDNA libraries were prepared using modified SMARTSeq v2 protocol with the  
97 Illumina Nextera XT kit. The length distribution of the cDNA libraries was monitored using DNA High  
98 Sensitivity Reagent Kit (Perkin Elmer). RNA-Seq analysis was performed using Illumina HiSeq 2000.

99  
100 **Study 8 (GSE134985)**

101 PBMCs from Tanzanian children were isolated and processed as described in the original paper [6].  
102 RNA was isolated using RNeasy Plus Mini kit (Qiagen). Libraries were generated from samples with  
103 high RNA quality using TruSeq Stranded mRNA Library prep (Illumina) by Eurofins. Libraries were  
104 sequenced to an average depth of 24 million 1 × 50– base pair single-end reads per sample on HiSeq  
105 2500 (Illumina, v4 chemistry).

106  
107 **Study 9 (GSE79970)**

108 PBMCs from healthy adolescent were isolated and processed as described in the original paper [7].  
109 Briefly, total RNA was extracted and purified. cDNA preparation was followed by RNAseq on Illumina  
110 HiSeq 2500.

111

#### 112 **Study 10 (Stanford University)**

113 PBMCs from healthy adults were isolated. RNA was extracted, the libraries were sequenced on  
114 Illumina NextSeq500 instrument using 2x100bp paired-end reads, following the manufacturer's  
115 protocols.

116

#### 117 **Study 11 (GSE114065)**

118 Children's naïve CD4<sup>+</sup> T cells were purified and processed as described in the original paper [8].  
119 Briefly, total RNA was isolated from the purified cells. Library preparation was performed using the  
120 Illumina TruSeq Stranded mRNA Kit and libraries were sequenced on the Illumina HiSeq 4000  
121 instrument.

122

123

#### 124 **Data processing**

125 All RNA-seq data were processed with the same inhouse workflow available at  
126 <https://github.com/uzh/ezRun>. Significance threshold for differentially expressed genes was set to p  
127 < 0.05 and was calculated for the entire gene lists in each project. All calculations between different  
128 conditions were done using the edgeR R package. Spearman correlation coefficient was calculated  
129 using Hmisc R package, with the threshold for significance set to  $\alpha = 0.05$ . Correlation plots were  
130 done using Python's Seaborn library. Coexpression heatmaps as well as correlation heatmaps were  
131 done using the corrplot R package.

132

133

**Table S1. Summary of the ACE-2-, CD147- and CD26- related genes analyzed in the study**

| Pathway        | Gene name      | Protein symbol                | Protein name                                            |
|----------------|----------------|-------------------------------|---------------------------------------------------------|
| ACE2           | <i>ACE2</i>    | ACE2                          | Angiotensin-converting enzyme 2                         |
|                | <i>ACE</i>     | ACE                           | Angiotensin-converting enzyme                           |
|                | <i>TMPRSS2</i> | TMPRSS2                       | Transmembrane protease serine 2                         |
|                | <i>SLC6A19</i> | S6A19, B(0)AT1                | Sodium-dependent neutral amino acid transporter B(0)AT1 |
| CD147          | <i>APH1A</i>   | APH1A                         | Gamma-secretase subunit APH-1A                          |
|                | <i>APH1B</i>   | APH1B                         | Gamma-secretase subunit APH-1B                          |
|                | <i>APOD</i>    | APOD                          | Apolipoprotein D                                        |
|                | <i>BSG</i>     | CD147, EMMPRIN                | Basigin                                                 |
|                | <i>CD44</i>    | CD44                          | CD44                                                    |
|                | <i>EGFR</i>    | EGFR                          | Epidermal growth factor receptor                        |
|                | <i>GP6</i>     | GPVI                          | Platelet glycoprotein VI                                |
|                | <i>ITGA3</i>   | ITGA3                         | Integrin alpha-3                                        |
|                | <i>ITGA6</i>   | ITGA6                         | Integrin alpha-6                                        |
|                | <i>ITGB1</i>   | ITGB1, CD29                   | Integrin beta-1                                         |
|                | <i>JUP</i>     | Plak                          | Junction plakoglobin                                    |
|                | <i>LGALS3</i>  | Gal-3                         | Galectin-3                                              |
|                | <i>NCSTN</i>   | Nicastrin                     | Nicastrin                                               |
|                | <i>NME1</i>    | NDK A                         | Nucleoside diphosphate kinase A                         |
|                | <i>NOD2</i>    | NOD2                          | Nucleotide-binding oligomerization domain-containing-2  |
|                | <i>NXNL1</i>   | NXNL1                         | Nucleoredoxin-like protein 1                            |
|                | <i>PPIA</i>    | CypA                          | Cyclophilin A                                           |
|                | <i>PPIB</i>    | CypB                          | CYPB, Cyclophilin B                                     |
|                | <i>PSEN1</i>   | PS-1                          | Presenilin 1                                            |
|                | <i>PSENEN</i>  | PEN-2                         | Gamma-secretase subunit PEN-2                           |
|                | <i>S100A9</i>  | S100A9                        | Protein S100A9                                          |
|                | <i>SDC1</i>    | SYND1                         | Syndecan-1                                              |
| <i>SLC16A1</i> | MCT1           | Monocarboxylate transporter 1 |                                                         |

|       |                |                  |                                                                   |
|-------|----------------|------------------|-------------------------------------------------------------------|
| CD147 | <i>SLC16A3</i> | MCT4             | Monocarboxylate transporter 4                                     |
|       | <i>SLC16A4</i> | MCT5             | Monocarboxylate transporter 5                                     |
|       | <i>SLC16A7</i> | MCT2             | Monocarboxylate transporter 2                                     |
|       | <i>SLC16A8</i> | MCT3             | Monocarboxylate transporter 3                                     |
|       | <i>SLC2A1</i>  | GLUT1            | Solute carrier family 2, Facilitated glucose transporter member 1 |
|       | <i>SLC3A2</i>  | CD98             | 4F2 cell-surface antigen heavy chain                              |
|       | <i>SLC7A5</i>  | CD98 light chain | Large neutral amino acids transporter small subunit 1             |
|       | <i>SPN</i>     | CD43, GALGP      | Leukosialin                                                       |
| NFATs | <i>NFAT5</i>   | NF-AT5           | Nuclear factor of activated T-cells 5                             |
|       | <i>NFATC1</i>  | NF-ATc1          | Nuclear factor of activated T-cells, cytoplasmic 1                |
|       | <i>NFATC2</i>  | NF-ATc2          | Nuclear factor of activated T-cells, cytoplasmic 2                |
|       | <i>NFATC3</i>  | NF-ATc3          | Nuclear factor of activated T-cells, cytoplasmic 3                |
|       | <i>NFATC4</i>  | NF-ATc4          | Nuclear factor of activated T-cells, cytoplasmic 4                |
| CD26  | <i>DPP4</i>    | CD26             | Dipeptyl peptidase 4                                              |

135  
136

137 **Table S2. Summary of purity, markers and methods of purification in immune cell analysis**

| Cell type                                  | Purity  | Markers                                           | Methods of purification                                                                                                                                                                                                                                                                                                                                                                 | Reference |
|--------------------------------------------|---------|---------------------------------------------------|-----------------------------------------------------------------------------------------------------------------------------------------------------------------------------------------------------------------------------------------------------------------------------------------------------------------------------------------------------------------------------------------|-----------|
| Neutrophils                                | >98%    | CD3-CD19-CD45+SCC-A+(high) CD16+                  | PBMCs were firstly separated into CD3+ and CD3- populations using magnetic beads. The CD3+ fraction was then split for different T cell staining while the CD3- fraction was split for B cell and progenitor-cell staining, or for monocyte, DCs, NK cells and LD granulocyte staining. After staining, the immune cells were sorted using a BD Influx, a FACS Aria 5 or a FACS Aria 4. | [5]       |
| Classical monocytes                        |         | CD3-CD19-CD45+CD11c+CD14+CD16-                    |                                                                                                                                                                                                                                                                                                                                                                                         |           |
| Plasmacytoid dendrite cells                |         | CD3-CD19-CD45+HLA-DR+CD123+                       |                                                                                                                                                                                                                                                                                                                                                                                         |           |
| Natural killer cells                       |         | CD3-CD19-CD45+CD16+CD56+                          |                                                                                                                                                                                                                                                                                                                                                                                         |           |
| Naïve CD4 <sup>+</sup> T cells             |         | CD3+CD4+CCR7+CD45RA+                              |                                                                                                                                                                                                                                                                                                                                                                                         |           |
| Terminal effector CD4 <sup>+</sup> T cells |         | CD3+CD4+CCR7+CD45RA-                              |                                                                                                                                                                                                                                                                                                                                                                                         |           |
| Naïve CD8 <sup>+</sup> T cells             |         | CD3+CD8+CCR7+CD45RA+                              |                                                                                                                                                                                                                                                                                                                                                                                         |           |
| Effector memory CD8 <sup>+</sup> T cells   |         | CD3+CD8+CCR7-CD45RA-                              |                                                                                                                                                                                                                                                                                                                                                                                         |           |
| Naïve B cells                              |         | CD3-CD56-CD16-CD14-CD45+CD19+CD27-IgD+            |                                                                                                                                                                                                                                                                                                                                                                                         |           |
| Plasmablasts                               |         | CD3-CD56-CD16-CD14-CD45+CD19+CD27+IgD-CD38+(high) |                                                                                                                                                                                                                                                                                                                                                                                         |           |
| ILC1                                       | 86%-96% | CD45+Lin-CD127+CD161+CRTH2-c-Kit-                 | Robust “2-round sorting” procedure by using flow cytometry with modified Mjösberg protocol                                                                                                                                                                                                                                                                                              | [2]       |
| ILC2                                       |         | CD45+Lin-CD127+CD161+CRTH2+c-Kit-                 |                                                                                                                                                                                                                                                                                                                                                                                         |           |
| ILC3                                       |         | CD45+Lin-CD127+CD161+CRTH2-c-Kit+                 |                                                                                                                                                                                                                                                                                                                                                                                         |           |

138

139 **Table S3. Summary of projects and databases analyzed in the manuscript**

| Database | Cell Type                                                                                                                                                                                           | Condition         | GEO       | Number of subjects                                                                                                                                                                                                                                                               |                                                                                                     | Age          | Reference |
|----------|-----------------------------------------------------------------------------------------------------------------------------------------------------------------------------------------------------|-------------------|-----------|----------------------------------------------------------------------------------------------------------------------------------------------------------------------------------------------------------------------------------------------------------------------------------|-----------------------------------------------------------------------------------------------------|--------------|-----------|
| SIAF 1   | HBECs                                                                                                                                                                                               | <i>(in vitro)</i> | n/a       | Control = 5<br>Asthma = 6<br>COPD = 5                                                                                                                                                                                                                                            |                                                                                                     | adults       | [1]       |
| SIAF 2   | HBECs                                                                                                                                                                                               | <i>(in vitro)</i> | n/a       | Control = 5                                                                                                                                                                                                                                                                      |                                                                                                     | adults       | n/a       |
| SIAF 3   | ILC1, ILC2,<br>ILC3                                                                                                                                                                                 | <i>(ex vivo)</i>  | GSE112591 | ILC1 = 6<br>ILC2 = 6<br>ILC3 = 6                                                                                                                                                                                                                                                 |                                                                                                     | adults       | [2]       |
| SIAF 4   | Skin biopsy                                                                                                                                                                                         | <i>(ex vivo)</i>  | n/a       | Control = 6<br>Atopic dermatitis (non lesional) = 11<br>Atopic dermatitis (lesional) = 11                                                                                                                                                                                        |                                                                                                     | adults       | [3]       |
| SIAF 5   | Bronchial biopsy                                                                                                                                                                                    | <i>(ex vivo)</i>  | GSE110551 | Control = 16<br>Asthma = 22<br>COPD = 3<br>Non-obese = 20<br>Obese = 21                                                                                                                                                                                                          | Normotension = 32<br>Hypertension = 9<br>Non-smoker = 19<br>Smoker = 21<br>Female = 14<br>Male = 27 | 20-60 years  | [4]       |
|          | BAL                                                                                                                                                                                                 |                   |           | Control = 16<br>Asthma = 22<br>COPD = 2<br>Non-obese = 19<br>Obese = 21                                                                                                                                                                                                          | Normotension = 31<br>Hypertension = 9<br>Non-smoker = 19<br>Smoker = 20<br>Female = 14<br>Male = 26 |              |           |
|          | Blood                                                                                                                                                                                               |                   |           | Control = 17<br>Asthma = 21<br>COPD = 3<br>Non-obese = 20<br>Obese = 21                                                                                                                                                                                                          | Normotension = 32<br>Hypertension = 9<br>Non-smoker = 19<br>Smoker = 21<br>Female = 14<br>Male = 27 |              |           |
| SIAF 6   | Children PBMCs                                                                                                                                                                                      | <i>(ex vivo)</i>  | n/a       | Control children = 14                                                                                                                                                                                                                                                            |                                                                                                     | 12-36 months | n/a       |
| Study 7  | neutrophils,<br>classical monocytes,<br>plasmacytoid dendrite cells,<br>natural killer cells, naïve CD4+ T cells, terminal effector CD4+ T cells, naïve CD8+ T cells, effector memory CD8+ T cells, | <i>(ex vivo)</i>  | GSE107011 | Neutrophils = 4<br>Classical monocytes = 4<br>Plasmacytoid dendrite cells = 4<br>Natural killer cells = 4<br>Naïve CD4+ T cells = 4<br>Terminal effector CD4+ T cells = 2<br>Naïve CD8+ T cells = 4<br>Effector memory CD8+ T cells = 4<br>Naïve B cells = 4<br>Plasmablasts = 4 |                                                                                                     | 20-35 years  | [5]       |



|          |                                   |                  |           |                         |             |     |
|----------|-----------------------------------|------------------|-----------|-------------------------|-------------|-----|
|          | naïve B cells,<br>plasmablasts    |                  |           |                         |             |     |
| Study 8  | Children<br>PBMCs                 | <i>(ex vivo)</i> | GSE134985 | Control children = 21   | 5-17 months | [6] |
| Study 9  | Adolescent<br>PBMCs               | <i>(ex vivo)</i> | GSE79970  | Control adolescent = 16 | 4-16 years  | [7] |
| Study 10 | Adults<br>PBMCs                   | <i>(ex vivo)</i> | n/a       | Control adult = 19      | 16-67 years | n/a |
| Study 11 | Children<br>naïve CD4+ T<br>cells | <i>(ex vivo)</i> | GSE114065 | Control children = 18   | 12 months   | [8] |

141 **Online References**

142

- 143 1. Wang, M.; Tan, G.; Eljaszewicz, A.; Meng, Y.; Wawrzyniak, P.; Acharya, S.; Altunbulakli, C.;  
144 Westermann, P.; Dreher, A.; Yan, L., et al. Laundry detergents and detergent residue after  
145 rinsing directly disrupt tight junction barrier integrity in human bronchial epithelial cells. *J*  
146 *Allergy Clin Immunol* **2019**, *143*, 1892-1903, doi:10.1016/j.jaci.2018.11.016.
- 147 2. Li, S.; Morita, H.; Sokolowska, M.; Tan, G.; Boonpiyathad, T.; Opitz, L.; Orimo, K.; Archer, S.K.;  
148 Jansen, K.; Tang, M.L.K., et al. Gene expression signatures of circulating human type 1, 2,  
149 and 3 innate lymphoid cells. *J Allergy Clin Immunol* **2019**, *143*, 2321-2325,  
150 doi:10.1016/j.jaci.2019.01.047.
- 151 3. Altunbulakli, C.; Reiger, M.; Neumann, A.U.; Garzorz-Stark, N.; Fleming, M.; Huelpuesch, C.;  
152 Castro-Giner, F.; Eyerich, K.; Akdis, C.A.; Traidl-Hoffmann, C. Relations between epidermal  
153 barrier dysregulation and Staphylococcus species-dominated microbiome dysbiosis in  
154 patients with atopic dermatitis. *J Allergy Clin Immunol* **2018**, *142*, 1643-1647 e1612,  
155 doi:10.1016/j.jaci.2018.07.005.
- 156 4. Michalovich, D.; Rodriguez-Perez, N.; Smolinska, S.; Pirozynski, M.; Mayhew, D.; Uddin, S.;  
157 Van Horn, S.; Sokolowska, M.; Altunbulakli, C.; Eljaszewicz, A., et al. Obesity and disease  
158 severity magnify disturbed microbiome-immune interactions in asthma patients. *Nat*  
159 *Commun* **2019**, *10*, 5711, doi:10.1038/s41467-019-13751-9.
- 160 5. Monaco, G.; Lee, B.; Xu, W.; Mustafah, S.; Hwang, Y.Y.; Carre, C.; Burdin, N.; Visan, L.;  
161 Ceccarelli, M.; Poidinger, M., et al. RNA-Seq Signatures Normalized by mRNA Abundance  
162 Allow Absolute Deconvolution of Human Immune Cell Types. *Cell Rep* **2019**, *26*, 1627-  
163 1640.e1627, doi:10.1016/j.celrep.2019.01.041.
- 164 6. Hill, D.L.; Carr, E.J.; Rutishauser, T.; Moncunill, G.; Campo, J.J.; Innocentin, S.; Mpina, M.;  
165 Nhabomba, A.; Tumbo, A.; Jairoce, C., et al. Immune system development varies according  
166 to age, location, and anemia in African children. *Sci Transl Med* **2020**, *12*,  
167 doi:10.1126/scitranslmed.aaw9522.
- 168 7. Wong, L.; Jiang, K.; Chen, Y.; Hennon, T.; Holmes, L.; Wallace, C.A.; Jarvis, J.N. Limits of  
169 Peripheral Blood Mononuclear Cells for Gene Expression-Based Biomarkers in Juvenile  
170 Idiopathic Arthritis. *Sci Rep* **2016**, *6*, 29477, doi:10.1038/srep29477.
- 171 8. Martino, D.; Neeland, M.; Dang, T.; Cobb, J.; Ellis, J.; Barnett, A.; Tang, M.; Vuillermin, P.;  
172 Allen, K.; Saffery, R. Epigenetic dysregulation of naive CD4+ T-cell activation genes in  
173 childhood food allergy. *Nat Commun* **2018**, *9*, 3308, doi:10.1038/s41467-018-05608-4.

174

175

176

177

178 **Supplementary Figure Titles and Legends**

179

180 **Figure S1. Heatmap of ACE-2-, CD147-and CD26-related gene expression in different cells and**  
181 **tissues**

182

183 **Figure S2. Gene Co-Expression in Bronchial Biopsy in non-diseased control**

184

185 **Figure S3. Gene Co-Expression in Blood in non-diseased control**

186

187 **Figure S4. Human Bronchial Epithelial Cells**

188 **A-E** Gene expression of *ACE*, *SDC1*, *LGALS3*, *NFAT5* and *NME1* in control, asthma and COPD  
189 population

190

191 **Figure S5. Bronchial Biopsy**

192 **A-F** Gene expression of *ACE*, *ACE2*, *BSG* (CD147), *CD44*, *SLC7A5* (CD98) and *ITGA3* in subgroups  
193 including control, asthma, COPD, non-obese, obese, normotension, hypertension, non-smoker,  
194 smoker, female and male.

195 **G-H** Gene expression of *ITGA6* and *APOD* in subgroups including control, asthma, COPD, non-obese,  
196 obese, normotension, hypertension, non-smoker, smoker, female and male.

197

198 **Figure S6. Gene Co-Expression in Bronchial Biopsy in asthma patients**

199

200 **Figure S7. Broncho-Alveolar Lavage**

201 **A-F** Gene expression of *ACE*, *ACE2*, *BSG* (CD147), *PPIA*, *S100A9* and *CD44* in subgroups including  
202 control, asthma, COPD, non-obese, obese, normotension, hypertension, non-smoker, smoker,  
203 female and male.

204 **G-L** Gene expression of *SLC16A7* (MCT2), *SLC16A3* (MCTs), *ITGA3*, *NFATC1*, *NFATC2* and *SLC7A5*  
205 (CD98) in subgroups including control, asthma, COPD, non-obese, obese, normotension,  
206 hypertension, non-smoker, smoker, female and male.

207 **M-O** Gene expression of *APH1A*, *PSEN1* and *PSENE1* in subgroups including control, asthma, COPD,  
208 non-obese, obese, normotension, hypertension, non-smoker, smoker, female and male.

209

210 **Figure S8. Blood**

211 **A-F** Gene expression of *ACE*, *ACE2*, *BSG* (CD147), *PPIA*, *S100A9* and *CD44* in subgroups including  
212 control, asthma, COPD, non-obese, obese, normotension, hypertension, non-smoker, smoker,  
213 female and male.

214 **G-L** Gene expression of *SLC16A7* (MCT2), *ITGA6*, *NFATC2*, *LGALS3*, *NOD2* and *NME1* in subgroups  
215 including control, asthma, COPD, non-obese, obese, normotension, hypertension, non-smoker,  
216 smoker, female and male.

217 **M** Gene expression of *DPP4* in subgroups including control, asthma, COPD, non-obese, obese,  
218 normotension, hypertension, non-smoker, smoker, female and male.

219

220 **Figure S9. Gene Co-Expression in Broncho-Alveolar Lavage in asthma patients**

221

222 **Figure S10. Gene Co-Expression in Blood in asthma patients**

223

224 **Figure S11. Correlation Analysis**

- 225 **A** Correlation analysis between *SDC1* and age in broncho-alveolar lavage  
226 **B** Correlation analysis between *SLC16A1* and age in blood  
227 **C** Correlation analysis between *NME1* and BMI in blood  
228 **D** Correlation analysis between *NCSTN* and BMI in blood  
229  
230
